# Supplementary material for: Systematic radical species control by electron push–pull substitution in the perylene-based D–π–A compounds
Source: Royal Society of Chemistry journal article supplement (doi:10.1039/d2ra06460j), 2023-01-01
Supplement: d2ra06460j2.pdf [file d2ra06460j2.pdf]

*Electronic Supplementary Information*

**Systematic Radical Species Control by Electron Push–Pull Substitution in  
the Perylene-based D– $\pi$ –A Compounds**

Mina Ahn,<sup>‡</sup> Soyeon Lee,<sup>‡</sup> Min-Ji Kim, Minjung Chae and Kyung-Ryang Wee\*

<sup>‡</sup>Department of Chemistry and Institute of Natural Science, Daegu University, Gyeongsan  
38453, Republic of Korea.

| Contents                                                                                            | Page    |
|-----------------------------------------------------------------------------------------------------|---------|
| Figure S1-S8. $^1\text{H}$ -NMR and $^{13}\text{C}\{^1\text{H}\}$ -NMR spectra of <b>3a-3d</b>      | S4-S7   |
| Figure S9. GC-MS data                                                                               | S8-S9   |
| Figure S10(A). UV-vis absorption spectra of <b>3a-3d</b>                                            | S9      |
| Figure S10(B). Absorption spectra of DPA(R), Triazine, Perylene, and <b>3a-3d</b> in solution       | S10     |
| Figure S11. Emission spectra of <b>3a-3d</b> in film state and <i>n</i> -Hexane                     | S10     |
| Table S1. Spectroscopic parameters of <b>3a-3d</b> in various solvents                              | S11     |
| Figure S12. UV-vis absorption spectra of <b>3a-3d</b> in various solvents                           | S12     |
| Figure S13. Emission spectra of <b>3a-3d</b> in various solvents                                    | S13     |
| Table S2. Dipole moment values of <b>3a-3d</b> in the ground and excited states                     | S14     |
| Figure S14. Comparison of Lippert–Mataga plots for <b>3a-3d</b> in different solvents               | S15     |
| Figure S15. Lippert–Mataga plots for compounds <b>3a-3d</b>                                         | S15     |
| Figure S16. Fluorescence lifetimes ( $\tau_F$ ) of <b>3a-3d</b> in DCM                              | S16     |
| Figure S17. The experimental and calculated energy levels of HOMO–LUMO for <b>3a-3d</b>             | S17     |
| Figure S18. UV-vis absorption spectral change of <b>3a<sup>-</sup>-3d<sup>-</sup></b>               | S17     |
| Figure S19. UV-vis absorption spectra of <b>3a<sup>+</sup>-3d<sup>+</sup></b>                       | S18     |
| Figure S20. Schematic diagram of radical cation species                                             | S18     |
| Table S3. DFT calculation: Summary of energies for <b>3a-3d</b>                                     | S19     |
| Figure S21. DFT calculation: Frontier orbital distributions of <b>3a-3d</b>                         | S20     |
| Table S4. DFT calculation: Cartesian coordinates for optimized structure for <b>3a</b>              | S21     |
| Figure S22-S25. DFT & TD-DFT calculation of <b>3a-3d</b>                                            | S22-S33 |
| Table S5. TD-DFT calculation: Transition assignment of <b>3a</b>                                    | S23     |
| Table S6. DFT calculation: Cartesian coordinates for optimized structure for <b>3b</b>              | S24     |
| Table S7. TD-DFT calculation: Transition assignment of <b>3b</b>                                    | S26     |
| Table S8. DFT calculation: Cartesian coordinates for optimized structure for <b>3c</b>              | S27-S28 |
| Table S9. TD-DFT calculation: Transition assignment of <b>3c</b>                                    | S30     |
| Table S10. DFT calculation: Cartesian coordinates for optimized structure for <b>3d</b>             | S31-S32 |
| Table S11. TD-DFT calculation: Transition assignment of <b>3d</b>                                   | S34     |
| Table S12. DFT calculation: Summary of energies for <b>3a<sup>-</sup>-3d<sup>-</sup></b>            | S35     |
| Table S13. DFT calculation: Cartesian coordinates for optimized structure for <b>3a<sup>-</sup></b> | S36     |
| Figure S26-S29. DFT & TD-DFT calculation of <b>3a<sup>-</sup>-3d<sup>-</sup></b>                    | S37-S51 |
| Table S14. TD-DFT calculation: Transition assignment of <b>3a<sup>-</sup></b>                       | S38-S39 |
| Table S15. DFT calculation: Cartesian coordinates for optimized structure for <b>3b<sup>-</sup></b> | S40     |
| Table S16. TD-DFT calculation: Transition assignment of <b>3b<sup>-</sup></b>                       | S42-S43 |
| Table S17. DFT calculation: Cartesian coordinates for optimized structure for <b>3c<sup>-</sup></b> | S44-S45 |

|                                                                                         |         |
|-----------------------------------------------------------------------------------------|---------|
| Table S18. TD-DFT calculation: Transition assignment of $3c^{+-}$                       | S47-S48 |
| Table S19. DFT calculation: Cartesian coordinates for optimized structure for $3d^{+-}$ | S49-S50 |
| Table S20. TD-DFT calculation: Transition assignment of $3d^{+-}$                       | S52-S53 |
| Table S21. DFT calculation: Summary of energies for $3a^{++}-3d^{++}$                   | S54     |
| Table S22. DFT calculation: Cartesian coordinates for optimized structure for $3a^{++}$ | S55     |
| Figure S30-S33. DFT & TD-DFT calculation of $3a^{++}-3d^{++}$                           | S56-S73 |
| Table S23. TD-DFT calculation: Transition assignment of $3a^{++}$                       | S57-S59 |
| Table S24. DFT calculation: Cartesian coordinates for optimized structure for $3b^{++}$ | S60     |
| Table S25. TD-DFT calculation: Transition assignment of $3b^{++}$                       | S62-S64 |
| Table S26. DFT calculation: Cartesian coordinates for optimized structure for $3c^{++}$ | S65-S66 |
| Table S27. TD-DFT calculation: Transition assignment of $3c^{++}$                       | S68-S70 |
| Table S28. DFT calculation: Cartesian coordinates for optimized structure for $3d^{++}$ | S71-S72 |
| Table S29. TD-DFT calculation: Transition assignment of $3d^{++}$                       | S74-S76 |
| Figure S34. Frontier orbital distributions (SOMO(A), LUMO(A)) of $3a^{++}-3d^{++}$      | S77     |
| Figure S35. Frontier orbital distributions (HOMO(B), LUMO+1(B)) of $3a^{+-}-3d^{+-}$    | S77     |
| Figure S36. spin density distribution plots of $3a^{++}-3d^{++}$ and $3a^{+-}-3d^{+-}$  | S78     |
| Table S30. IP and EA at the $\omega$ B97XD/6-31+G(d) level                              | S78     |
| Reference                                                                               | S79     |

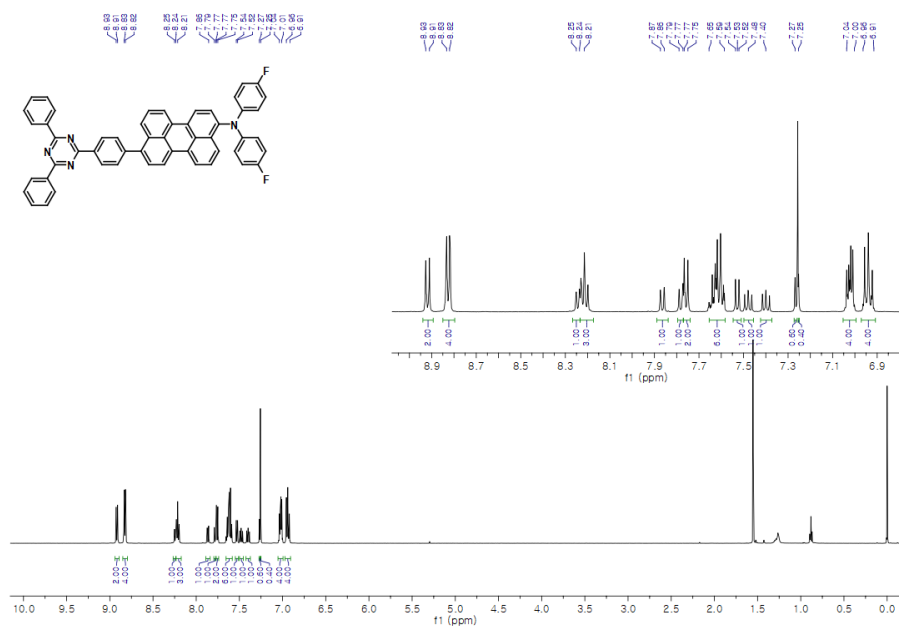

Figure S1.  $^1\text{H}$ -NMR spectrum of **3a** in  $\text{CDCl}_3$  (500MHz, 293K)

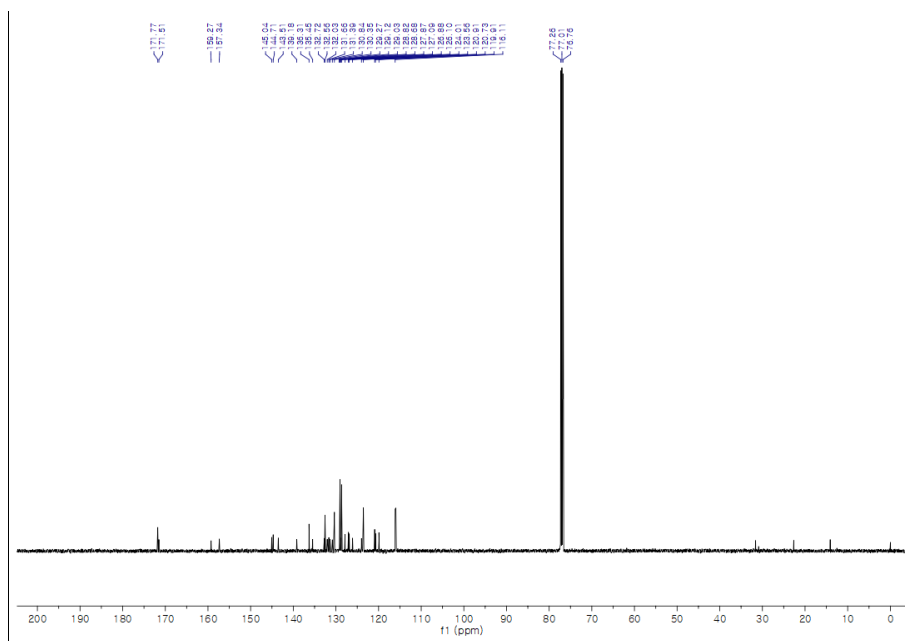

Figure S2.  $^{13}\text{C}\{^1\text{H}\}$ -NMR spectrum of **3a** in  $\text{CDCl}_3$  (125MHz, 293K)

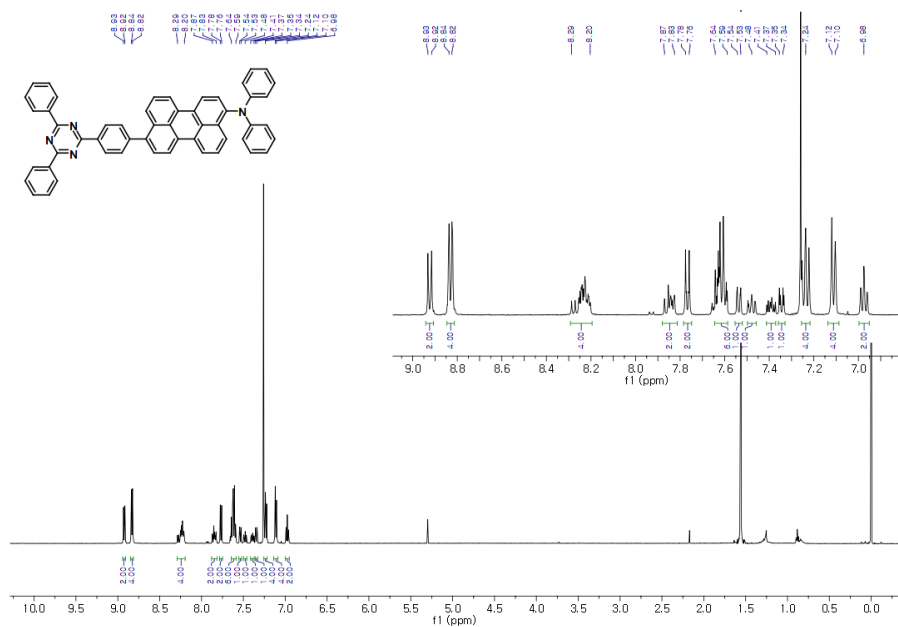

Figure S3. <sup>1</sup>H-NMR spectrum of **3b** in CDCl<sub>3</sub> (500MHz, 293K)

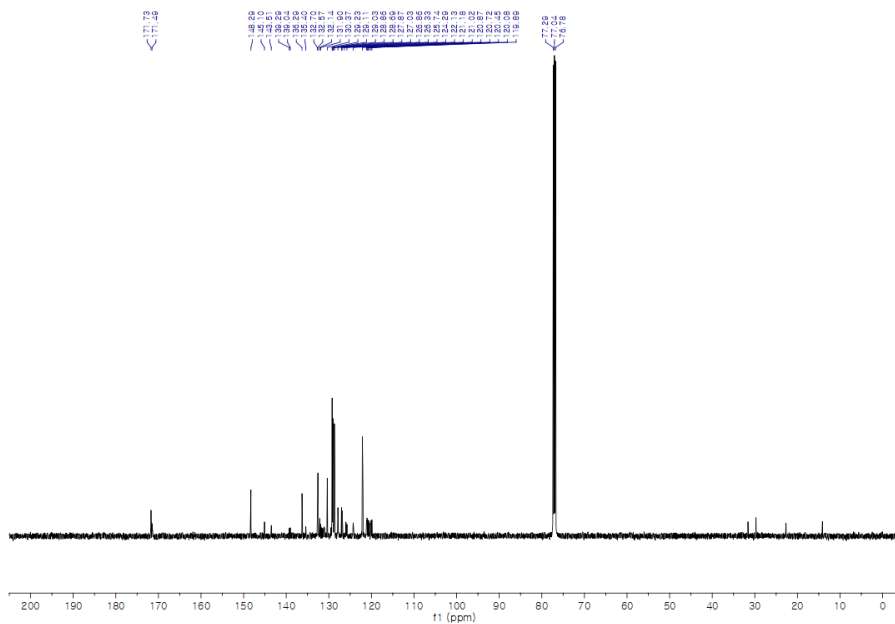

Figure S4. <sup>13</sup>C{<sup>1</sup>H}-NMR spectrum of **3b** in CDCl<sub>3</sub> (125MHz, 293K)

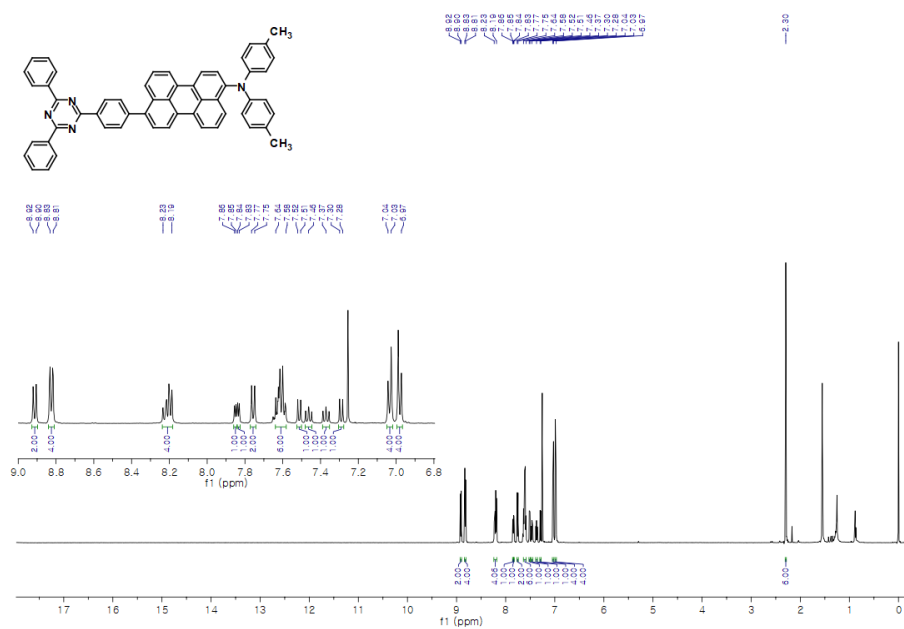

Figure S5.  $^1\text{H-NMR}$  spectrum of **3c** in  $\text{CDCl}_3$  (500MHz, 293K)

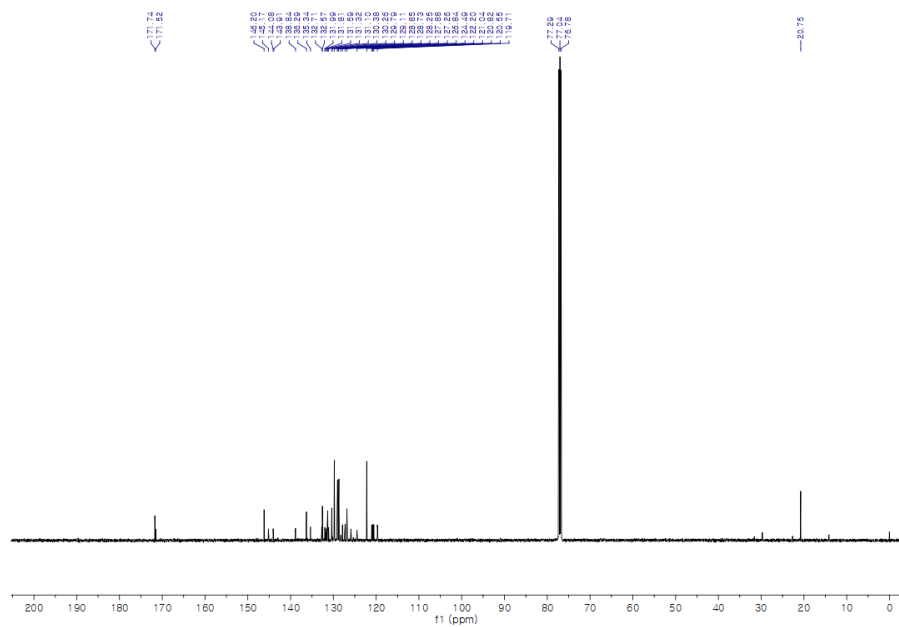

Figure S6.  $^{13}\text{C}\{^1\text{H}\}$ -NMR spectrum of **3c** in  $\text{CDCl}_3$  (125MHz, 293K)

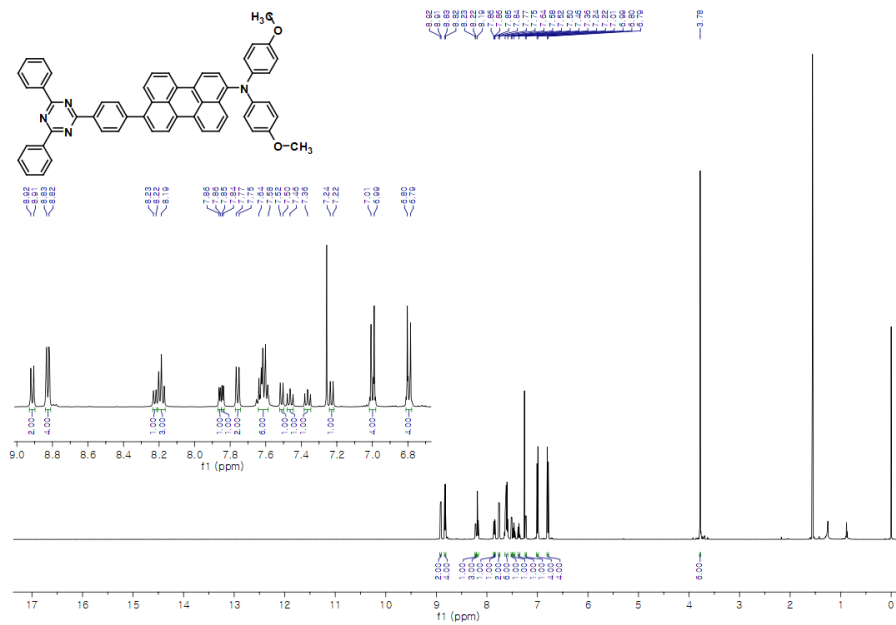

Figure S7.  $^1\text{H-NMR}$  spectrum of **3d** in  $\text{CDCl}_3$  (500MHz, 293K)

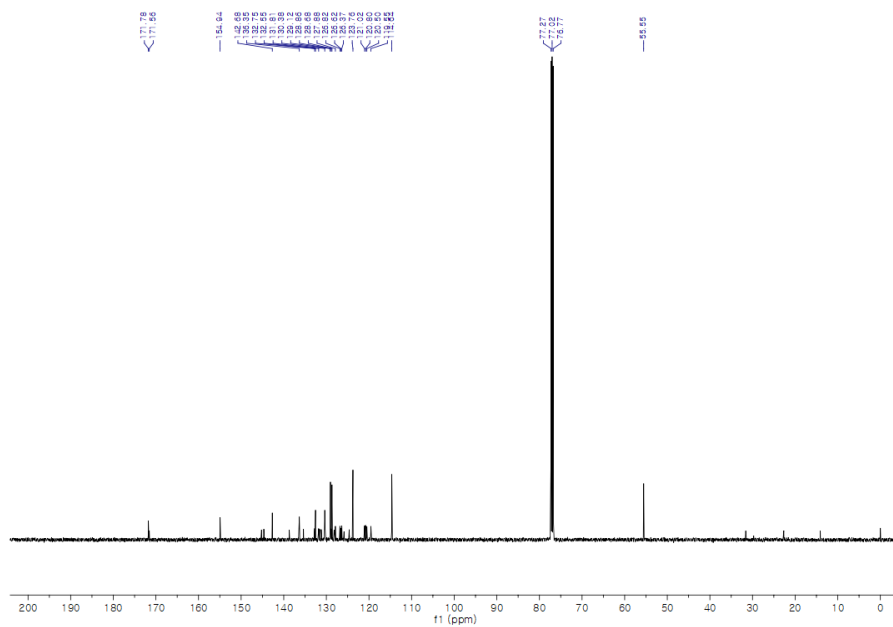

Figure S8.  $^{13}\text{C}\{^1\text{H}\}$ -NMR spectrum of **3d** in  $\text{CDCl}_3$  (125MHz, 293K)

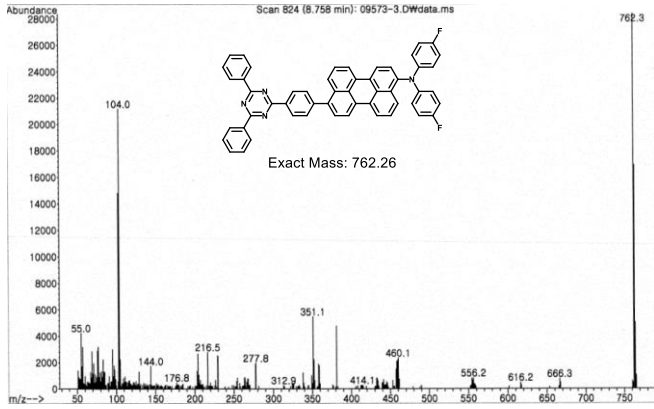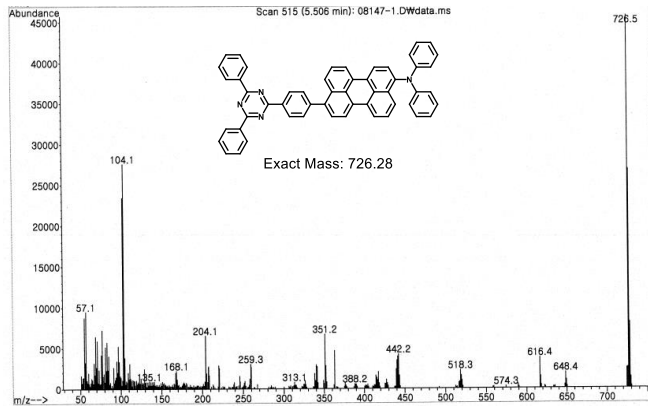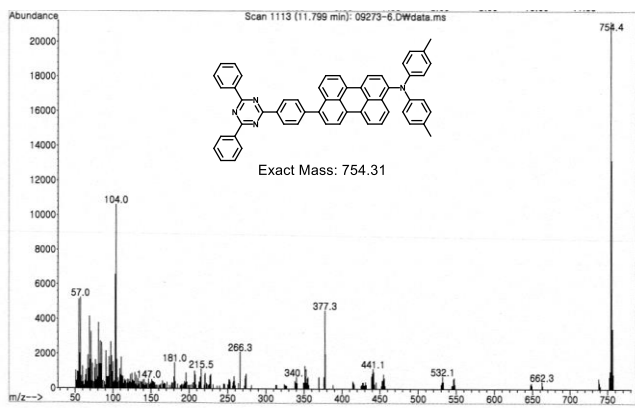



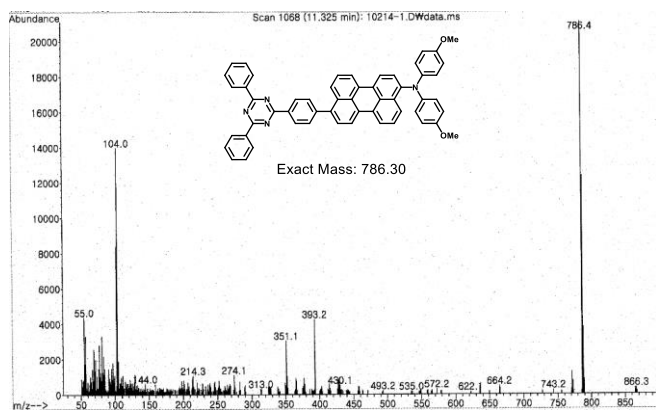

Figure S9. GC-MS data of **3a–3d**

(A)

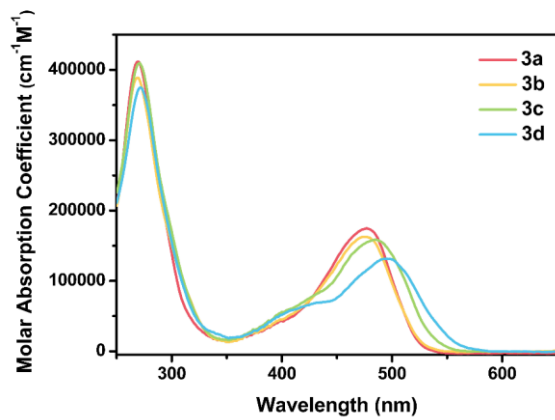

Figure S10(A). UV-vis absorption spectra of **3a–3d** in DCM solution at  $1 \mu\text{M}$ .

(B)

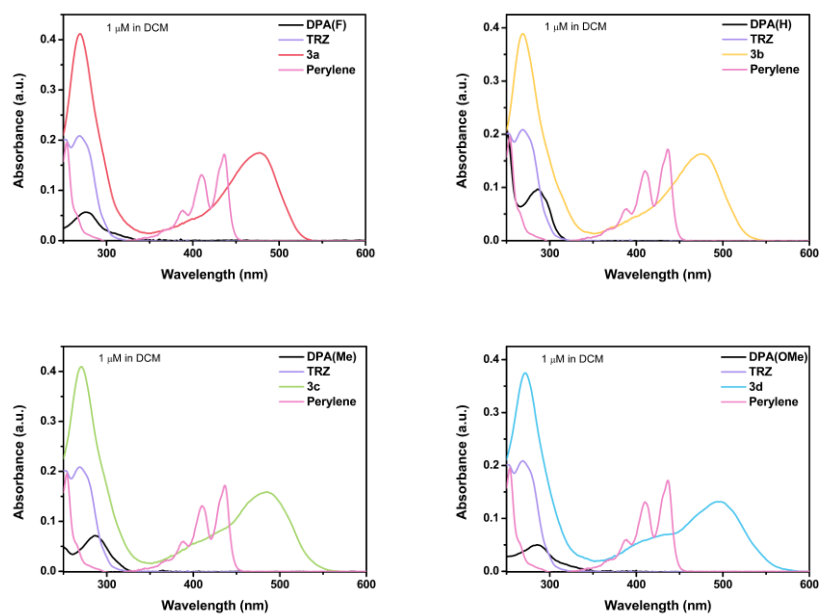

Figure S10(B). UV-vis absorption spectra in DCM solution of *N,N*-bis(4'-(*R*)-phenyl)amino (R: F, H, Me, OMe) (DPA(R)), Triazine (TRZ), **3a–3d**, and Perylene.

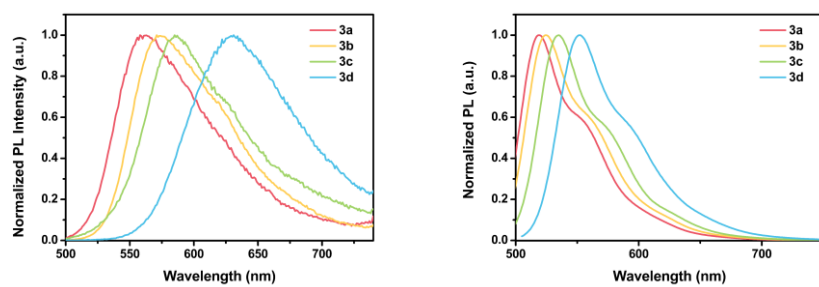

Figure S11. (Left): Emission spectra of **3a–3d** in film state. (Right): Emission spectra of **3a–3d** in *n*-Hexane solution.

Table S1. Spectroscopic parameters of **3a–3d** in various solvents

| compounds | Solvents         | $\lambda_{\text{max}}$ abs (nm) | $\lambda_{\text{max}}$ em (nm) | Stokes shift ( $\text{cm}^{-1}$ ) |
|-----------|------------------|---------------------------------|--------------------------------|-----------------------------------|
| <b>3a</b> | <i>n</i> -Hexane | 477                             | 519                            | 1696                              |
|           | Cyclohexane      | 478                             | 521                            | 1727                              |
|           | Toluene          | 481                             | 536                            | 2133                              |
|           | THF              | 478                             | 556                            | 2935                              |
|           | DCM              | 477                             | 559                            | 3075                              |
|           | ACN              | 472                             | 581                            | 3975                              |
| <b>3b</b> | <i>n</i> -Hexane | 477                             | 524                            | 1880                              |
|           | Cyclohexane      | 477                             | 527                            | 1989                              |
|           | Toluene          | 481                             | 542                            | 2340                              |
|           | THF              | 475                             | 564                            | 3322                              |
|           | DCM              | 474                             | 570                            | 3553                              |
|           | ACN              | 470                             | 588                            | 4270                              |
| <b>3c</b> | <i>n</i> -Hexane | 487                             | 535                            | 1842                              |
|           | Cyclohexane      | 490                             | 538                            | 1821                              |
|           | Toluene          | 490                             | 554                            | 2358                              |
|           | THF              | 486                             | 579                            | 3305                              |
|           | DCM              | 485                             | 590                            | 3669                              |
|           | ACN              | 475                             | 622                            | 4975                              |
| <b>3d</b> | <i>n</i> -Hexane | 496                             | 552                            | 2045                              |
|           | Cyclohexane      | 496                             | 555                            | 2143                              |
|           | Toluene          | 499                             | 585                            | 2946                              |
|           | THF              | 495                             | 628                            | 4278                              |
|           | DCM              | 494                             | 632                            | 4420                              |
|           | ACN              | 489                             | 675                            | 5635                              |

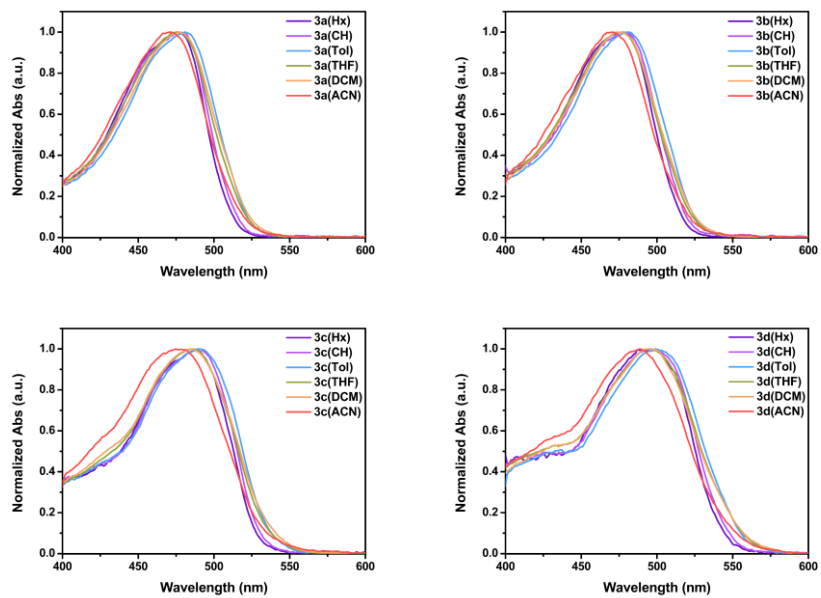

Figure S12. UV-vis absorption spectra of **3a–3d** in *n*-Hexane, Cyclohexane, Toluene, THF, DCM, and ACN at room temperature

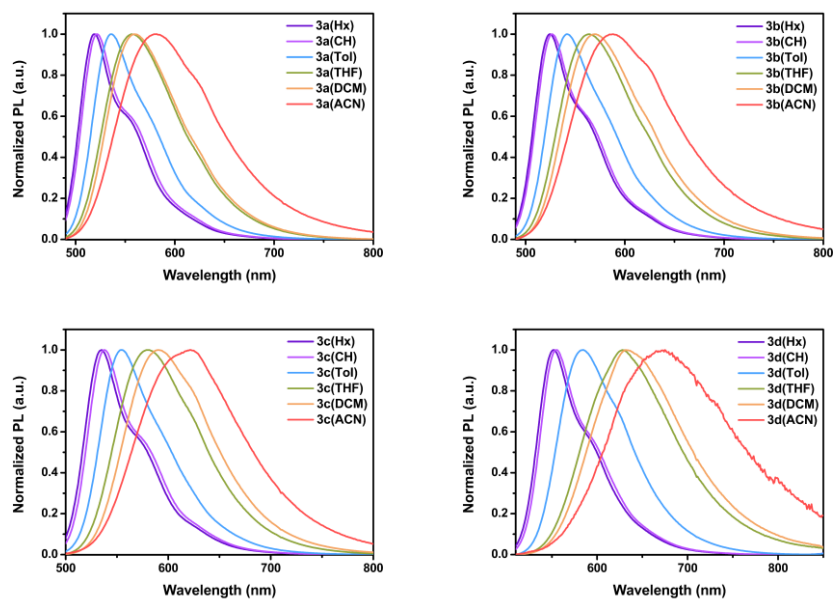

Figure S13. Emission spectra of **3a–3d** in *n*-Hexane, Cyclohexane, Toluene, THF, DCM, and ACN at room temperature

Stokes shifts ( $\Delta\nu$ ) of compounds **3a–3d** were plotted as a function of solvent polarity parameters ( $\Delta f$ ), according to the Lippert–Mataga method using Eq. (1):

$$\begin{aligned}\Delta\nu = \bar{\nu}_a - \bar{\nu}_f &= \frac{2}{hca_0^3} \left( \frac{\varepsilon - 1}{2\varepsilon + 1} + \frac{n^2 - 1}{2n^2 + 1} \right) \times (\mu_e - \mu_g)^2 + \text{constant} \\ &= 2\Delta f \times \frac{\Delta\mu^2}{hca_0^3} + \text{constant} \quad (1)\end{aligned}$$

where,  $\mu_e - \mu_g$  ( $\Delta\mu$ ) is the difference between the dipole moments in the excited and ground states,  $c$  is the speed of light,  $h$  is Planck’s constant, and  $a_0$  is the radius of the Onsager cavity around the fluorophore. The dielectric constants ( $\varepsilon$ ) (1.9 *n*-Hexane, 2.02 Cyclohexane, 2.38 Toluene, 7.6 THF, 9.1 DCM, and 37.5 ACN) and the refractive indices ( $n$ ) of solvents are included in the term  $\Delta f$ , which is known as orientation polarizability. The Onsager radius was determined by DFT calculations (B3LYP method, 6-31G(d, p) basis) and was considered to be half of the average size of 24.5, 24.5, 25.3, and 25.4 Å for **3a–3d**, respectively. The ground-state dipole moment values ( $\mu_g$ ) for energy minimized structures obtained by the DFT method are above zero due to the asymmetry of these compounds. Using the values of the ground state dipole moment ( $\mu_g$ ) and dipole moment change ( $\Delta\mu$ ), the excited state dipole moments ( $\mu_e$ ) are calculated to be 36.7, 36.8, 44.0, and 47.1 D for **3a–3d**. These values confirm that the excited state of **3a–3d** has a relatively larger dipole moment than the ground state, consistent with the observed solvatochromic behavior.

Table S2. Dipole moment values of **3a–3d** in the ground and excited states

| Compounds | $\Delta\mu$ | $\mu_g$  | $\mu_e$ |
|-----------|-------------|----------|---------|
| <b>3a</b> | 35.1 D      | 1.5682 D | 36.7 D  |
| <b>3b</b> | 36.6 D      | 0.1689 D | 36.8 D  |
| <b>3c</b> | 43.1 D      | 0.8943 D | 44.0 D  |
| <b>3d</b> | 46.8 D      | 0.3368 D | 47.1 D  |

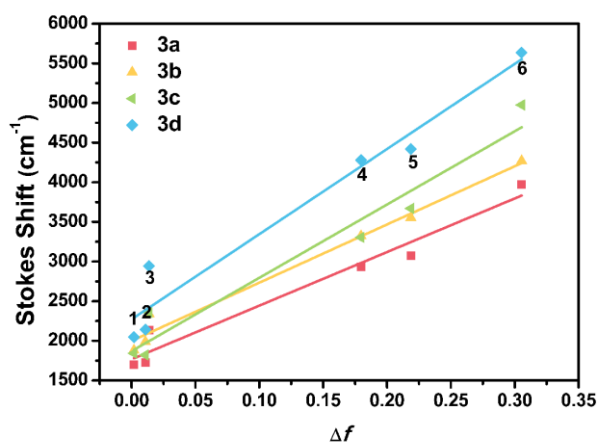

Figure S14. Comparison of Lippert–Mataga plots for **3a–3d** in different solvents: 1, *n*-Hexane; 2, Cyclohexane; 3, Toluene; 4, THF; 5, DCM; 6, ACN.

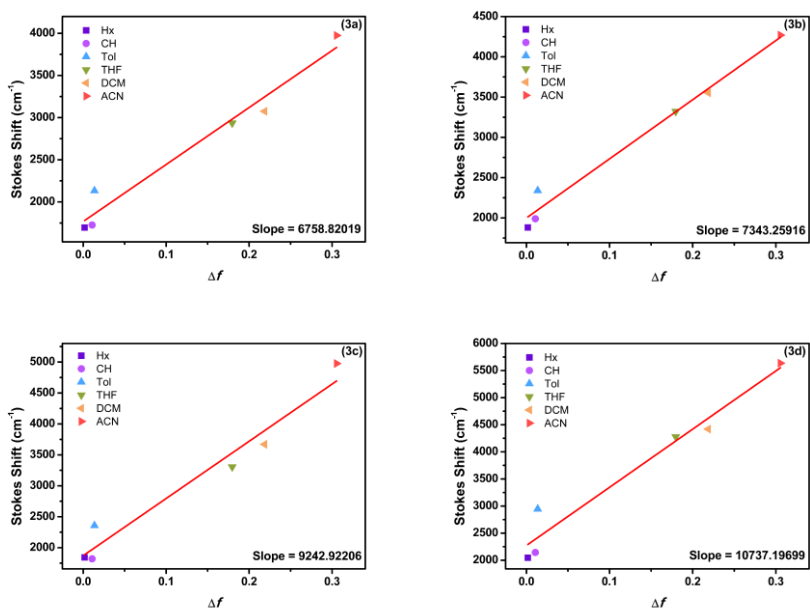

Figure S15. Lippert–Mataga plots for compounds **3a–3d**.

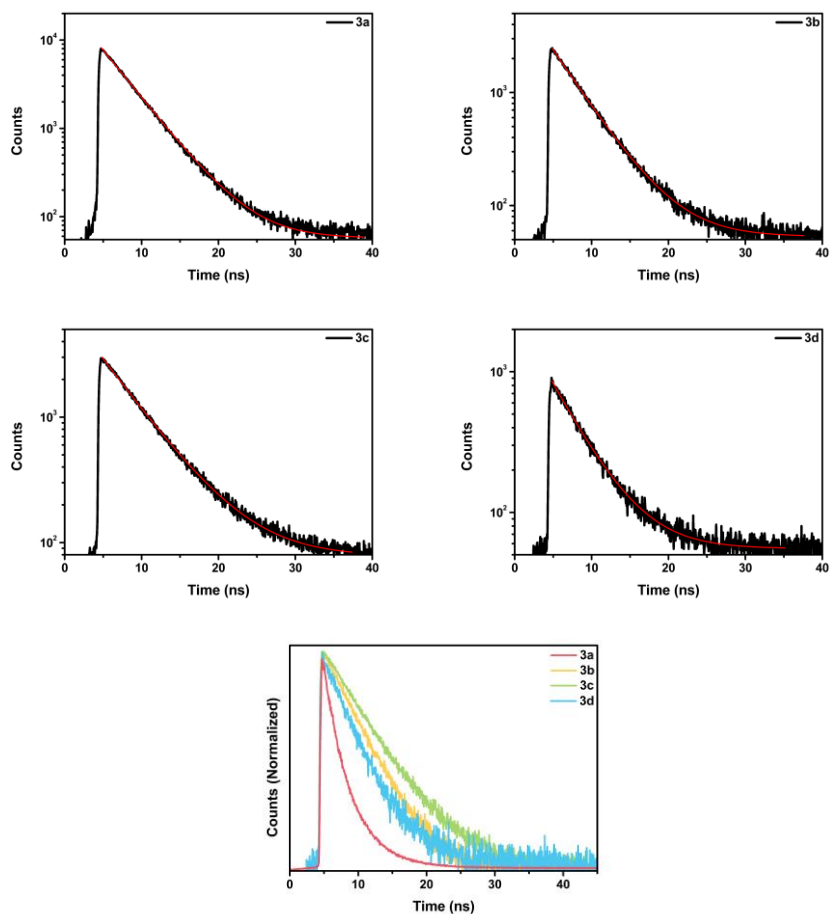

Figure S16. Fluorescence lifetimes ( $\tau_F$ ) of **3a–3d** in DCM solution at RT.



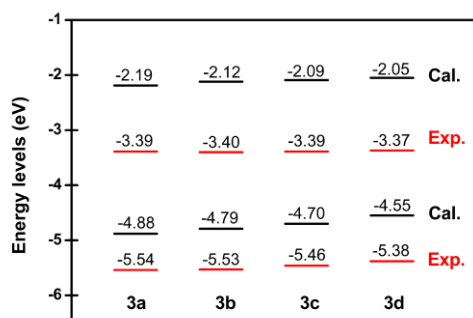

Figure S17. The experimental (red line) and calculated (black line) energy levels of HOMO–LUMO for 3a–3d.

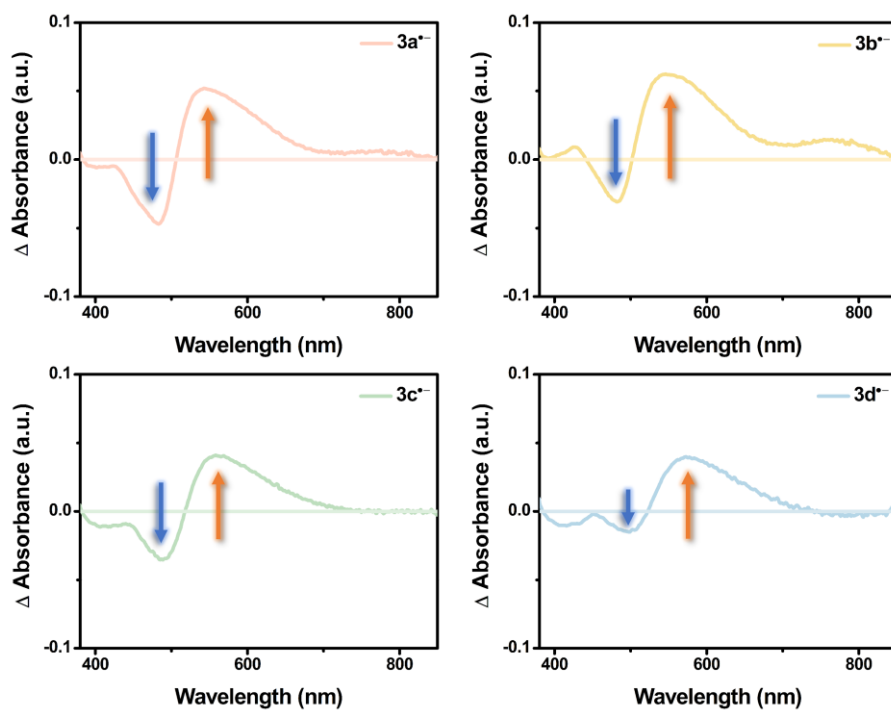

Figure S18. UV-vis absorption spectral change of 3a<sup>•-</sup>–3d<sup>•-</sup> formed during the electrochemical reduction from neutral to radical anion (0.1 mM / 0.1 M TBAP / DCM).

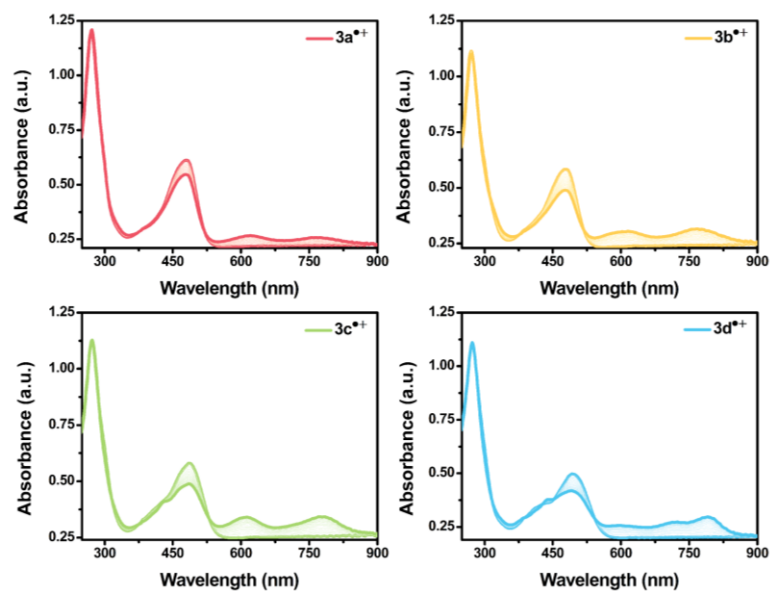

Figure S19. UV-vis absorption spectra of  $3a^{\bullet+}$ – $3d^{\bullet+}$  formed during the electrochemical oxidation from neutral to radical cation (0.1 mM / 0.1 M TBAP/ DCM).

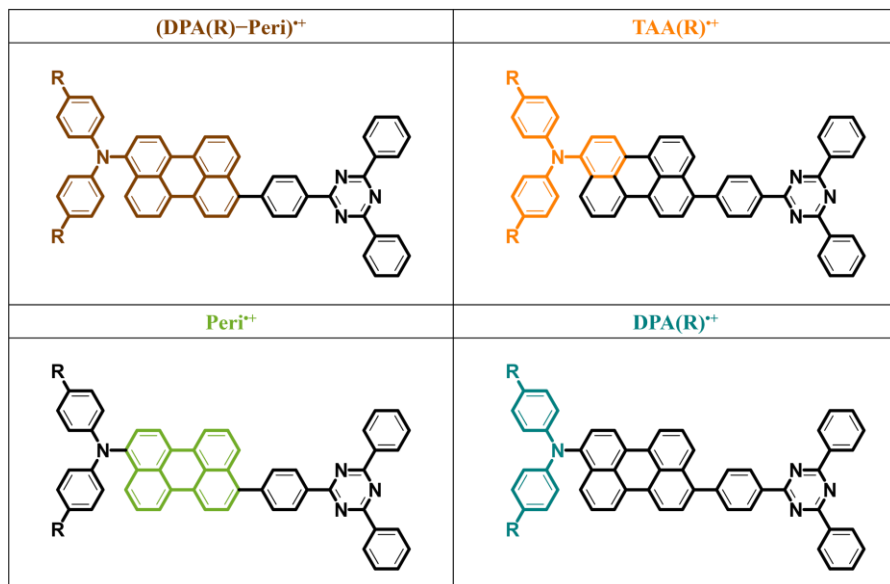

Figure S20. Schematic diagram of radical cation species.

### DFT/TD-DFT Calculation Details

All the calculations were performed on the platform of the Gaussian 16 package.<sup>1</sup> The ground-state geometry of **3a–3d**, **3a<sup>-</sup>–3d<sup>-</sup>** and **3a<sup>+</sup>–3d<sup>+</sup>** has been optimized at the density function theory (DFT) level. Full geometry optimizations in their ground singlet and doublet state were performed using B3LYP<sup>2</sup>/6-31G<sup>3</sup>(d,p) (for **3a–3d**) and  $\omega$ B97XD<sup>4</sup>/6-31+G<sup>3</sup>(d) (for **3a<sup>-</sup>–3d<sup>-</sup>** and **3a<sup>+</sup>–3d<sup>+</sup>**) level theory for all atoms. The nature of the stationary points located was further checked by computations of harmonic vibrational frequencies at the same level of theory. The ground state energies obtained by DFT calculation (imaginary frequencies, total energies, and dipole moment) show in Table S3, S12 and S21. As well as, all of the Cartesian coordinates for optimized structure of **3a–3d** (Table S4, S6, S8 and S10), **3a<sup>-</sup>–3d<sup>-</sup>** (Table S13, S15, S17 and S19) and **3a<sup>+</sup>–3d<sup>+</sup>** (Table S22, S24, S26 and S28) are also summarized. The Isodensity plots (isodensity contour = 0.035 a.u.) of the selected frontier orbitals were visualized by Chem3D Ultra and GaussView 5.0 program (Figure S22-S33). The excitation energies and oscillator strengths for singlet–singlet and doublet–doublet electronic transitions at the optimized geometry in the ground state were obtained in TD-DFT calculations using the same basis set and functional as for the ground state. The simulated absorption spectra were obtained by the GaussSum program based on TD-DFT results. All of the Transition assignment for optimized structure of **3a–3d** (Table S5, S7, S9 and S11), **3a<sup>-</sup>–3d<sup>-</sup>** (Table S14, S16, S18 and S20) and **3a<sup>+</sup>–3d<sup>+</sup>** (Table S23, S25, S27 and S29) are also summarized.

Table S3. The number of imaginary frequencies, total energies, and dipole moments for the compound **3a–3d** as obtained in the geometry optimizations at B3LYP/6-31G(d,p) method

| Entry     | Number of imaginary frequencies | Total energies (Eh)<br>(Hartrees) | Ground state dipole moment<br>(field-independent basis, Debye) |
|-----------|---------------------------------|-----------------------------------|----------------------------------------------------------------|
| <b>3a</b> | 0                               | -2457.735353                      | 1.568117                                                       |
| <b>3b</b> | 0                               | -2259.274010                      | 0.168921                                                       |
| <b>3c</b> | 0                               | -2337.914648                      | 0.894326                                                       |
| <b>3d</b> | 0                               | -2488.321718                      | 0.336753                                                       |

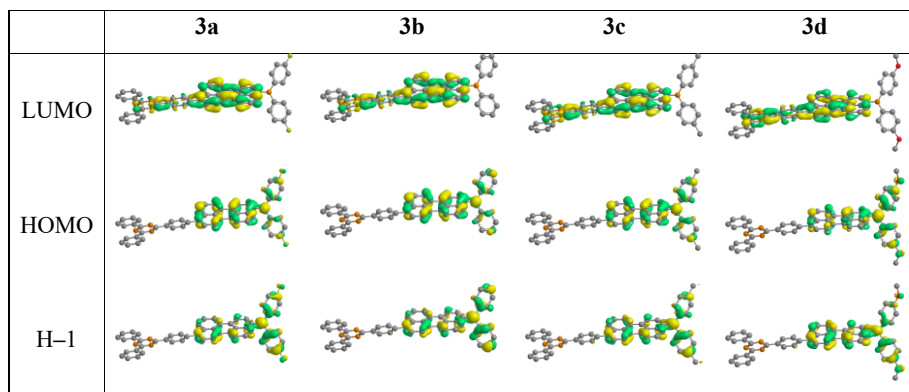

Figure S21. Frontier orbital distributions (HOMO-1, HOMO, LUMO) of **3a-3d** calculated by DFT using B3LYP function and 6-31G-(d, p) basis.

Table S4. Cartesian coordinates for optimized structure for **3a**

Symbolic Z-matrix:

Charge = 0 Multiplicity = 1

| Atom | X        | Y        | Z        | Atom | X        | Y        | Z        |
|------|----------|----------|----------|------|----------|----------|----------|
| C    | -4.55196 | 0.85592  | -1.73554 | C    | 9.811938 | -2.17344 | 0.238054 |
| C    | -5.92493 | 0.796475 | -1.46475 | C    | 11.20787 | -2.04949 | 0.159654 |
| C    | -6.40673 | 0.117459 | -0.36072 | C    | 12.02037 | -3.1747  | 0.270794 |
| C    | -5.48448 | -0.54216 | 0.515147 | C    | 11.45058 | -4.43572 | 0.461231 |
| C    | -5.93181 | -1.31319 | 1.61696  | C    | 10.06213 | -4.56655 | 0.540197 |
| C    | -5.02458 | -1.93366 | 2.445268 | C    | 9.246323 | -3.4437  | 0.429585 |
| C    | -3.64534 | -1.79719 | 2.222895 | C    | 10.71566 | 2.747605 | -0.45628 |
| C    | -3.14705 | -1.0583  | 1.154536 | C    | 11.28397 | 4.00419  | -0.64764 |
| C    | -1.69851 | -0.89802 | 0.925988 | C    | 10.46942 | 5.133838 | -0.75496 |
| C    | -0.75415 | -1.39405 | 1.817432 | C    | 9.081537 | 5.000841 | -0.66999 |
| C    | 0.621278 | -1.24688 | 1.596923 | C    | 8.509488 | 3.745927 | -0.47886 |
| C    | 1.11549  | -0.6017  | 0.475338 | F    | -9.8869  | 2.478025 | 4.446396 |
| C    | 0.181167 | -0.09892 | -0.4914  | F    | -11.091  | -1.55001 | -4.30257 |
| C    | 0.614818 | 0.48291  | -1.7114  | H    | -4.23752 | 1.41349  | -2.60947 |
| C    | -0.2967  | 0.956643 | -2.62727 | H    | -6.62522 | 1.293327 | -2.12832 |
| C    | -1.67319 | 0.885919 | -2.36526 | H    | -6.99507 | -1.41556 | 1.793161 |
| C    | -2.16344 | 0.317256 | -1.19412 | H    | -5.37277 | -2.5339  | 3.280476 |
| C    | -1.23176 | -0.22288 | -0.24727 | H    | -2.9677  | -2.29784 | 2.903893 |
| C    | -3.60835 | 0.256894 | -0.90672 | H    | -1.06745 | -1.89288 | 2.726606 |
| C    | -4.07454 | -0.43897 | 0.254514 | H    | 1.317168 | -1.62123 | 2.341572 |
| N    | -7.81174 | 0.062251 | -0.11199 | H    | 1.674925 | 0.532276 | -1.92709 |
| C    | 2.587522 | -0.44777 | 0.331414 | H    | 0.046775 | 1.386268 | -3.56359 |
| C    | -8.34822 | 0.697062 | 1.041127 | H    | -2.35565 | 1.271985 | -3.11287 |
| C    | -8.66669 | -0.33741 | -1.17814 | H    | -10.0283 | -0.64828 | 1.201997 |
| C    | -9.52505 | 0.208506 | 1.636651 | H    | -10.9588 | 0.443636 | 3.23913  |
| C    | -10.0509 | 0.812914 | 2.774898 | H    | -7.71839 | 3.243131 | 3.23656  |
| C    | -9.38373 | 1.897205 | 3.334659 | H    | -6.79666 | 2.187902 | 1.175514 |
| C    | -8.21306 | 2.394002 | 2.777731 | H    | -10.0419 | 1.313292 | -0.98247 |
| C    | -7.70314 | 1.798456 | 1.624905 | H    | -11.5075 | 0.565312 | -2.85582 |
| C    | -9.80253 | 0.408926 | -1.53065 | H    | -8.9485  | -2.80118 | -3.53518 |
| C    | -10.6272 | -0.00314 | -2.5761  | H    | -7.49222 | -2.0841  | -1.63803 |
| C    | -10.2983 | -1.15294 | -3.2831  | H    | 2.55845  | 1.694773 | 0.076879 |
| C    | -9.17284 | -1.9055  | -2.96635 | H    | 5.019981 | 1.919369 | -0.06932 |
| C    | -8.3658  | -1.5     | -1.90699 | H    | 5.452253 | -2.30908 | 0.449901 |
| C    | 3.18595  | 0.81158  | 0.142651 | H    | 2.987677 | -2.54974 | 0.583221 |
| C    | 4.567315 | 0.94433  | 0.066636 | H    | 11.63746 | -1.06588 | 0.011803 |
| C    | 5.400332 | -0.18004 | 0.175586 | H    | 13.09944 | -3.06895 | 0.208935 |
| C    | 4.811887 | -1.43878 | 0.368664 | H    | 12.08576 | -5.31264 | 0.547709 |
| C    | 3.429883 | -1.56744 | 0.447096 | H    | 9.615407 | -5.5453  | 0.688114 |
| C    | 6.872799 | -0.03985 | 0.090432 | H    | 8.168083 | -3.53185 | 0.489118 |
| N    | 7.376642 | 1.190076 | -0.09551 | H    | 11.33645 | 1.863675 | -0.37141 |
| C    | 8.714469 | 1.268647 | -0.16619 | H    | 12.36342 | 4.103555 | -0.71323 |
| N    | 9.537678 | 0.213706 | -0.06455 | H    | 10.91426 | 6.113527 | -0.9041  |
| C    | 8.944629 | -0.97598 | 0.119797 | H    | 8.44494  | 5.876789 | -0.75278 |
| N    | 7.616826 | -1.15103 | 0.204017 | H    | 7.434414 | 3.62949  | -0.41121 |
| C    | 9.321824 | 2.606439 | -0.37006 |      |          |          |          |

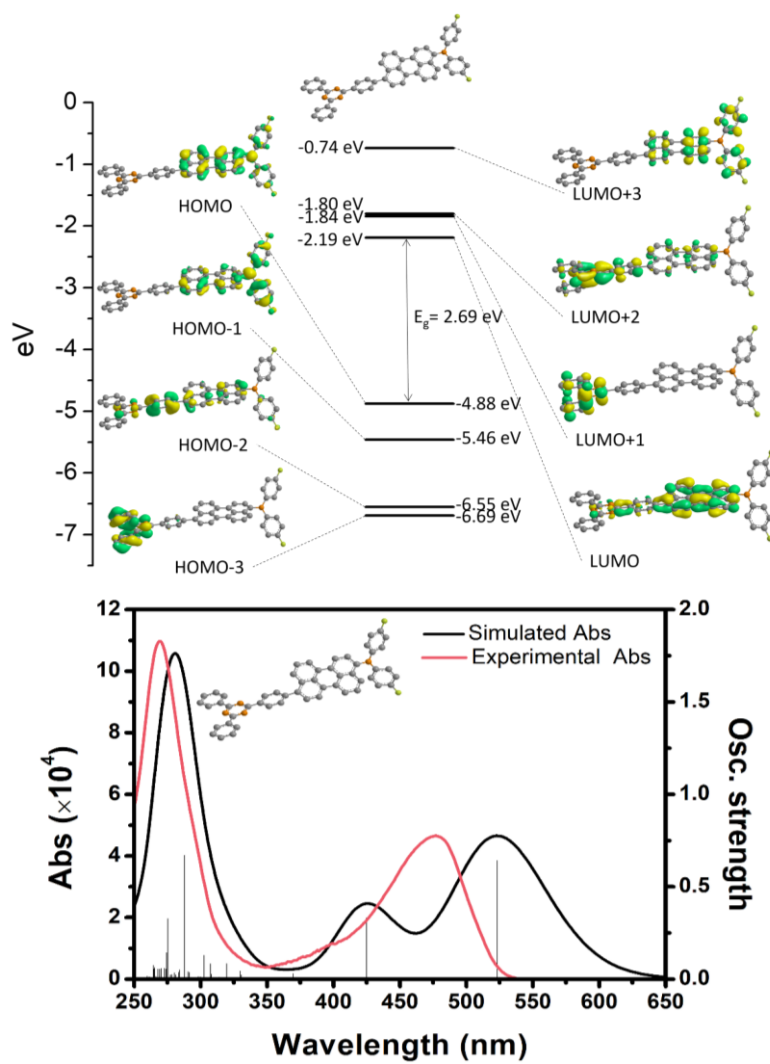

Figure S22. (Up): Energy levels and isodensity plots (isodensity contour = 0.035 a.u.) of 3a (Down): Electronic transition of the simulated/experimental absorption spectra of 3a

Formatted: Font: Not Bold

Table S5. TD-DFT calculation: Transition assignment of **3a**

| No | Excitation Energy<br>( $cm^{-1}$ ) | Wavelength<br>(nm) | Oscillator<br>strength | Assignment                                                            |
|----|------------------------------------|--------------------|------------------------|-----------------------------------------------------------------------|
| 1  | 19110.50064                        | 523.27             | 0.6411                 | HOMO->LUMO (95%)                                                      |
| 2  | 22227.02695                        | 449.90             | 0.0067                 | H-1->LUMO (19%), HOMO->L+2 (76%)                                      |
| 3  | 22563.36015                        | 443.19             | 0.0007                 | HOMO->L+1 (96%)                                                       |
| 4  | 23536.87134                        | 424.86             | 0.3321                 | H-1->LUMO (74%), HOMO->L+2 (20%)                                      |
| 5  | 27059.90109                        | 369.55             | 0.0307                 | H-1->L+2 (92%)                                                        |
| 6  | 27391.39496                        | 365.07             | 0.0002                 | H-1->L+1 (96%)                                                        |
| 7  | 28172.94620                        | 354.95             | 0.0048                 | HOMO->L+3 (81%)                                                       |
| 8  | 30250.63041                        | 330.57             | 0.0227                 | H-4->LUMO (12%), HOMO->L+4 (42%),<br>HOMO->L+5 (24%)                  |
| 9  | 30326.44653                        | 329.74             | 0.0439                 | HOMO->L+4 (29%), HOMO->L+5 (37%)                                      |
| 10 | 31285.43974                        | 319.63             | 0.085                  | H-2->LUMO (66%)                                                       |
| 11 | 31853.25406                        | 313.93             | 0.01                   | H-7->LUMO (11%), H-6->LUMO (16%),<br>HOMO->L+12 (10%)                 |
| 12 | 32369.44889                        | 308.93             | 0.0039                 | H-3->LUMO (30%), H-3->L+2 (15%), H-2->L+1<br>(17%)                    |
| 13 | 32438.81258                        | 308.27             | 0.0261                 | H-7->LUMO (19%), H-3->LUMO (14%)                                      |
| 14 | 32527.53356                        | 307.43             | 0.0829                 | H-4->LUMO (13%), HOMO->L+4 (11%),<br>HOMO->L+6 (28%), HOMO->L+8 (10%) |
| 15 | 32558.18263                        | 307.14             | 0.0121                 | H-14->LUMO (32%), H-14->L+2 (41%), H-13-<br>>L+1 (13%)                |
| 16 | 32925.16490                        | 303.71             | 0.0041                 | H-13->LUMO (41%), H-13->L+2 (56%)                                     |
| 17 | 33054.21360                        | 302.53             | 0.1292                 | HOMO->L+7 (66%)                                                       |
| 18 | 33170.35744                        | 301.47             | 0.0001                 | H-13->L+1 (83%)                                                       |
| 19 | 33337.31421                        | 299.96             | 0.0121                 | H-1->L+3 (31%), HOMO->L+6 (14%), HOMO-<br>>L+9 (16%)                  |
| 20 | 33430.87452                        | 299.12             | 0.0025                 | H-14->L+1 (92%)                                                       |

Table S6. Cartesian coordinates for optimized structure for **3b**

Symbolic Z-matrix:  
Charge = 0 Multiplicity = 1

| Atom | X        | Y        | Z        | Atom | X        | Y        | Z        |
|------|----------|----------|----------|------|----------|----------|----------|
| C    | -4.99082 | 1.212403 | -1.54909 | C    | 9.357506 | -2.203   | -0.1341  |
| C    | -6.36438 | 1.109312 | -1.29523 | C    | 10.28892 | 2.757562 | 0.068044 |
| C    | -6.85003 | 0.243047 | -0.33325 | C    | 10.86434 | 4.024893 | 0.105368 |
| C    | -5.93132 | -0.56765 | 0.408938 | C    | 10.05567 | 5.160525 | 0.191966 |
| C    | -6.38349 | -1.52313 | 1.353002 | C    | 8.666534 | 5.022704 | 0.241159 |
| C    | -5.47998 | -2.2878  | 2.055099 | C    | 8.087402 | 3.757059 | 0.204095 |
| C    | -4.09984 | -2.12044 | 1.860668 | C    | 10.75427 | -2.07503 | -0.18679 |
| C    | -3.59704 | -1.20268 | 0.943924 | C    | 11.56055 | -3.20672 | -0.2754  |
| C    | -2.14752 | -1.01127 | 0.747764 | C    | 10.98364 | -4.47829 | -0.31246 |
| C    | -1.20622 | -1.66823 | 1.53201  | C    | 9.594321 | -4.61316 | -0.26042 |
| C    | 0.169985 | -1.49006 | 1.341974 | C    | 8.784727 | -3.48387 | -0.17178 |
| C    | 0.668488 | -0.65152 | 0.358657 | H    | -4.67305 | 1.91879  | -2.30648 |
| C    | -0.26251 | 0.025664 | -0.49874 | H    | -7.06284 | 1.720257 | -1.85772 |
| C    | 0.174942 | 0.820226 | -1.59066 | H    | -7.44742 | -1.64904 | 1.508784 |
| C    | -0.73365 | 1.459078 | -2.40331 | H    | -5.83184 | -3.02716 | 2.768315 |
| C    | -2.11069 | 1.347725 | -2.1591  | H    | -3.4252  | -2.7395  | 2.439751 |
| C    | -2.60486 | 0.57516  | -1.113   | H    | -1.52273 | -2.32471 | 2.333515 |
| C    | -1.67637 | -0.13419 | -0.28147 | H    | 0.863375 | -1.99892 | 2.004725 |
| C    | -4.05045 | 0.468725 | -0.84265 | H    | 1.235426 | 0.903153 | -1.79387 |
| C    | -4.52071 | -0.4254  | 0.171692 | H    | -0.3873  | 2.052454 | -3.24432 |
| N    | -8.25581 | 0.150195 | -0.10161 | H    | -2.79073 | 1.868171 | -2.8227  |
| C    | 2.141411 | -0.48158 | 0.246193 | H    | -10.5318 | 1.455911 | -0.72701 |
| C    | -8.79172 | 0.563077 | 1.147585 | H    | -11.9757 | 1.01699  | -2.68173 |
| C    | -9.10508 | -0.08496 | -1.21928 | H    | -11.3731 | -0.76042 | -4.31763 |
| C    | -10.2682 | 0.672979 | -1.4296  | H    | -9.30254 | -2.09825 | -3.95947 |
| C    | -11.0797 | 0.420629 | -2.53457 | H    | -7.87416 | -1.67824 | -1.98527 |
| C    | -10.7408 | -0.57175 | -3.45565 | H    | -10.4801 | -0.77755 | 1.055088 |
| C    | -9.578   | -1.31881 | -3.25479 | H    | -11.4001 | -0.09007 | 3.239293 |
| C    | -8.76957 | -1.08664 | -2.14491 | H    | -10.2308 | 1.627825 | 4.614037 |
| C    | -9.9724  | -0.01973 | 1.642093 | H    | -8.13111 | 2.65344  | 3.753011 |
| C    | -10.4864 | 0.371366 | 2.875432 | H    | -7.22901 | 1.991263 | 1.553033 |
| C    | -9.83051 | 1.331818 | 3.649434 | H    | 2.124273 | 1.671747 | 0.38351  |
| C    | -8.65305 | 1.90273  | 3.166409 | H    | 4.587147 | 1.905574 | 0.283984 |
| C    | -8.13839 | 1.532126 | 1.924743 | H    | 4.996362 | -2.34948 | 0.030563 |
| C    | 2.747017 | 0.787797 | 0.28917  | H    | 2.530364 | -2.59645 | 0.113571 |
| C    | 4.129202 | 0.924495 | 0.240501 | H    | 10.90506 | 1.868863 | 0.000968 |
| C    | 4.956313 | -0.2056  | 0.145938 | H    | 11.94476 | 4.12796  | 0.066957 |
| C    | 4.360784 | -1.47524 | 0.107041 | H    | 10.50604 | 6.148581 | 0.221049 |
| C    | 2.977992 | -1.60823 | 0.158399 | H    | 8.034449 | 5.90323  | 0.308604 |
| C    | 6.429508 | -0.06064 | 0.091006 | H    | 7.011282 | 3.636719 | 0.241599 |
| N    | 6.940498 | 1.179929 | 0.128513 | H    | 11.18938 | -1.0832  | -0.15729 |
| C    | 8.2789   | 1.262179 | 0.077589 | H    | 12.64032 | -3.09776 | -0.31567 |
| N    | 9.096602 | 0.201425 | -0.00713 | H    | 11.61397 | -5.36024 | -0.38165 |
| C    | 8.496694 | -0.99864 | -0.03988 | H    | 9.142022 | -5.60008 | -0.28909 |
| N    | 7.167812 | -1.17841 | 0.007222 | H    | 7.705871 | -3.57502 | -0.13079 |
| C    | 8.893801 | 2.611511 | 0.117114 |      |          |          |          |



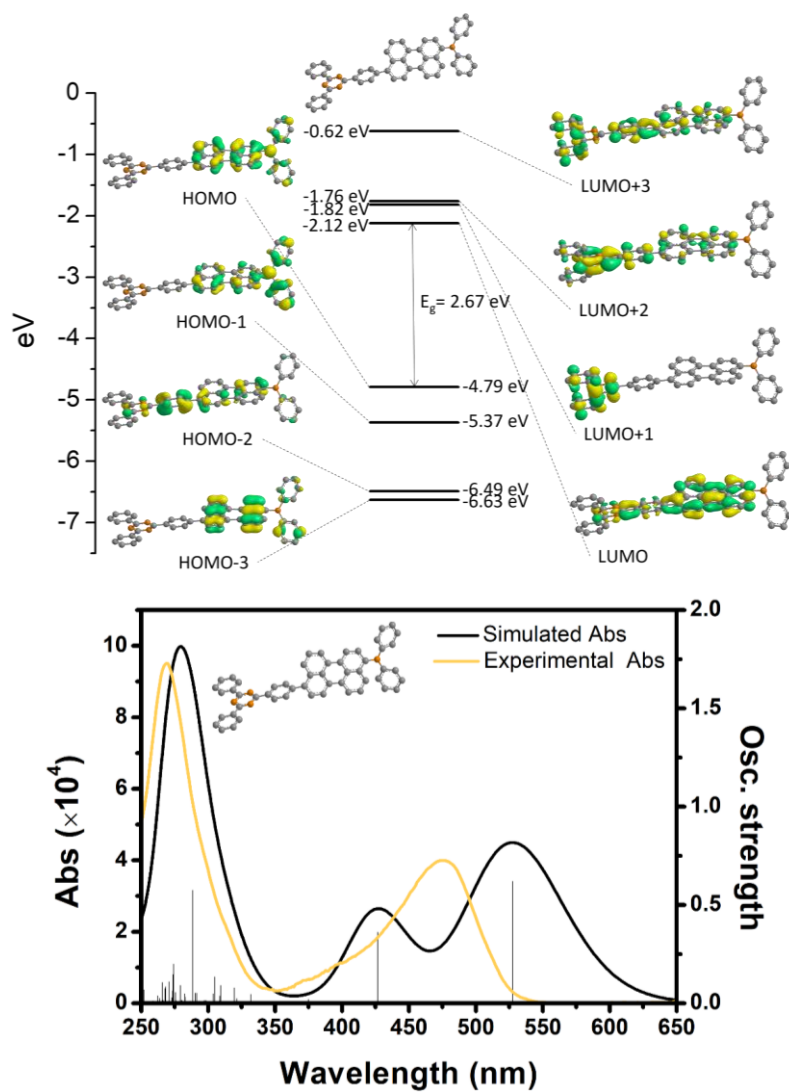

Figure S23. (Up): Energy levels and isodensity plots (isodensity contour = 0.035 a.u.) of **3b** (Down): Electronic transition of the simulated/experimental absorption spectra of **3b**

Table S7. TD-DFT calculation: Transition assignment of **3b**

| No | Excitation Energy<br>( $cm^{-1}$ ) | Wavelength<br>(nm) | Oscillator<br>strength | Assignment                                         |
|----|------------------------------------|--------------------|------------------------|----------------------------------------------------|
| 1  | 18960.48151                        | 527.41             | 0.6198                 | HOMO->LUMO (96%)                                   |
| 2  | 21911.66417                        | 456.37             | 0.0014                 | H-1->LUMO (17%), HOMO->L+2 (76%)                   |
| 3  | 22098.78480                        | 452.51             | 0.0004                 | HOMO->L+1 (93%)                                    |
| 4  | 23429.59960                        | 426.81             | 0.3623                 | H-1->LUMO (76%), HOMO->L+2 (18%)                   |
| 5  | 26672.75496                        | 374.91             | 0.0202                 | H-1->L+2 (91%)                                     |
| 6  | 26896.17054                        | 371.80             | 0.0003                 | H-1->L+1 (95%)                                     |
| 7  | 28415.71908                        | 351.91             | 0.0031                 | H-3->LUMO (11%), HOMO->L+4 (81%)                   |
| 8  | 30146.58489                        | 331.71             | 0.046                  | HOMO->L+3 (73%), HOMO->L+6 (12%)                   |
| 9  | 31107.19121                        | 321.46             | 0.0229                 | H-6->LUMO (14%), HOMO->L+5 (25%)                   |
| 10 | 31295.11839                        | 319.53             | 0.0779                 | H-2->LUMO (58%)                                    |
| 11 | 32322.66874                        | 309.38             | 0.0906                 | H-8->LUMO (13%), H-3->LUMO (21%), H-2->LUMO (21%)  |
| 12 | 32397.67830                        | 308.66             | 0.036                  | H-4->LUMO (13%), HOMO->L+5 (11%), HOMO->L+6 (12%)  |
| 13 | 32443.65190                        | 308.22             | 0.0109                 | H-4->LUMO (23%), H-4->L+2 (13%), H-2->L+1 (18%)    |
| 14 | 32580.76615                        | 306.92             | 0.0015                 | H-15->L+1 (15%), H-14->LUMO (35%), H-14->L+2 (38%) |
| 15 | 32787.24409                        | 304.99             | 0.1338                 | HOMO->L+5 (30%), HOMO->L+6 (11%), HOMO->L+9 (10%)  |
| 16 | 32933.23044                        | 303.64             | 0.048                  | HOMO->L+7 (48%), HOMO->L+8 (11%)                   |
| 17 | 32973.55816                        | 303.27             | 0.0012                 | H-15->LUMO (44%), H-15->L+2 (50%)                  |
| 18 | 33176.80988                        | 301.41             | 0.0001                 | H-15->L+1 (80%)                                    |
| 19 | 33404.25823                        | 299.36             | 0.0026                 | H-14->L+1 (89%)                                    |
| 20 | 33500.23820                        | 298.50             | 0.0147                 | H-5->LUMO (20%), H-3->LUMO (14%), HOMO->L+6 (22%)  |

Table S8. Cartesian coordinates for optimized structure for **3c**

Symbolic Z-matrix:  
Charge = 0 Multiplicity = 1

| Atom | X        | Y        | Z        | Atom | X        | Y        | Z        |
|------|----------|----------|----------|------|----------|----------|----------|
| C    | -4.54488 | 0.783743 | -1.77443 | C    | 11.45964 | -4.41295 | 0.646253 |
| C    | -5.91749 | 0.736694 | -1.50092 | C    | 10.07104 | -4.54096 | 0.727043 |
| C    | -6.4     | 0.106724 | -0.36806 | C    | 9.255197 | -3.42375 | 0.569367 |
| C    | -5.47642 | -0.51607 | 0.533675 | C    | 10.72425 | 2.72655  | -0.56786 |
| C    | -5.92349 | -1.24064 | 1.666627 | C    | 11.29243 | 3.974397 | -0.81015 |
| C    | -5.01641 | -1.82812 | 2.518818 | C    | 10.47771 | 5.098469 | -0.96442 |
| C    | -3.63716 | -1.70266 | 2.289886 | C    | 9.089796 | 4.968634 | -0.87523 |
| C    | -3.13913 | -1.0087  | 1.191744 | C    | 8.517894 | 3.722434 | -0.63326 |
| C    | -1.69054 | -0.85945 | 0.955881 | C    | -11.2255 | -1.78997 | -4.37799 |
| C    | -0.74593 | -1.31927 | 1.866458 | C    | -9.95755 | 2.723249 | 4.529201 |
| C    | 0.629375 | -1.18226 | 1.639298 | H    | -4.23059 | 1.304013 | -2.67125 |
| C    | 1.123619 | -0.58363 | 0.492136 | H    | -6.61834 | 1.204923 | -2.18424 |
| C    | 0.189296 | -0.12031 | -0.49418 | H    | -6.98673 | -1.33295 | 1.848164 |
| C    | 0.622652 | 0.410719 | -1.73726 | H    | -5.36479 | -2.3932  | 3.378173 |
| C    | -0.28943 | 0.846917 | -2.67108 | H    | -2.95933 | -2.17602 | 2.990074 |
| C    | -1.6658  | 0.787798 | -2.40591 | H    | -1.05923 | -1.77993 | 2.795551 |
| C    | -2.15604 | 0.267923 | -1.21216 | H    | 1.325406 | -1.52601 | 2.398508 |
| C    | -1.22374 | -0.23336 | -0.24445 | H    | 1.682606 | 0.450416 | -1.95574 |
| C    | -3.6006  | 0.220108 | -0.9217  | H    | 0.053778 | 1.237675 | -3.62446 |
| C    | -4.06668 | -0.42591 | 0.267708 | H    | -2.34859 | 1.143288 | -3.16822 |
| N    | -7.80354 | 0.06453  | -0.1176  | H    | -10.059  | 1.256166 | -1.00969 |
| C    | 2.59558  | -0.43574 | 0.342573 | H    | -11.5087 | 0.455078 | -2.83144 |
| C    | -8.33717 | 0.73491  | 1.016674 | H    | -8.89898 | -2.89608 | -3.44336 |
| C    | -8.65975 | -0.37685 | -1.16627 | H    | -7.46284 | -2.11472 | -1.59985 |
| C    | -9.80866 | 0.339482 | -1.53258 | H    | -10.0242 | -0.59496 | 1.220749 |
| C    | -10.625  | -0.11957 | -2.5645  | H    | -10.9379 | 0.534684 | 3.205591 |
| C    | -10.3234 | -1.2869  | -3.27633 | H    | -7.6782  | 3.323294 | 3.125004 |
| C    | -9.16423 | -1.9856  | -2.91135 | H    | -6.77812 | 2.219039 | 1.118863 |
| C    | -8.34908 | -1.55034 | -1.8712  | H    | 2.566501 | 1.693499 | -0.00547 |
| C    | -9.51531 | 0.271991 | 1.628797 | H    | 5.027952 | 1.912551 | -0.15835 |
| C    | -10.026  | 0.914896 | 2.751089 | H    | 5.460901 | -2.28929 | 0.544972 |
| C    | -9.38353 | 2.024737 | 3.319651 | H    | 2.996368 | -2.52451 | 0.685887 |
| C    | -8.20459 | 2.466871 | 2.710723 | H    | 11.6466  | -1.06382 | 0.061963 |
| C    | -7.6891  | 1.845637 | 1.573788 | H    | 13.10872 | -3.0568  | 0.343163 |
| C    | 3.194227 | 0.814305 | 0.099615 | H    | 12.09484 | -5.28546 | 0.769475 |
| C    | 4.575562 | 0.944124 | 0.019433 | H    | 9.624164 | -5.51313 | 0.913104 |
| C    | 5.408995 | -0.17411 | 0.178254 | H    | 8.176825 | -3.50976 | 0.629701 |
| C    | 4.820503 | -1.42345 | 0.425278 | H    | 11.34513 | 1.846976 | -0.44631 |
| C    | 3.438494 | -1.54893 | 0.507673 | H    | 12.37192 | 4.071273 | -0.87886 |
| C    | 6.881157 | -0.03721 | 0.089028 | H    | 10.92243 | 6.071352 | -1.15326 |
| N    | 7.385393 | 1.18416  | -0.14697 | H    | 8.453001 | 5.840243 | -0.99442 |
| C    | 8.723123 | 1.260045 | -0.21901 | H    | 7.442798 | 3.608478 | -0.5618  |
| N    | 9.546706 | 0.210587 | -0.07281 | H    | -11.8077 | -0.97632 | -4.82088 |
| C    | 8.953436 | -0.97058 | 0.159642 | H    | -10.6526 | -2.26877 | -5.17835 |
| N    | 7.625759 | -1.14248 | 0.249327 | H    | -11.94   | -2.53397 | -4.00308 |
| C    | 9.820909 | -2.16204 | 0.328206 | H    | -10.3508 | 2.00644  | 5.257743 |
| C    | 9.330403 | 2.588613 | -0.4771  | H    | -9.20294 | 3.334035 | 5.033054 |

|   |          |          |          |  |   |          |          |          |
|---|----------|----------|----------|--|---|----------|----------|----------|
| C | 11.21698 | -2.04087 | 0.248253 |  | H | -10.7859 | 3.388434 | 4.253893 |
| C | 12.02952 | -3.1604  | 0.406596 |  |   |          |          |          |

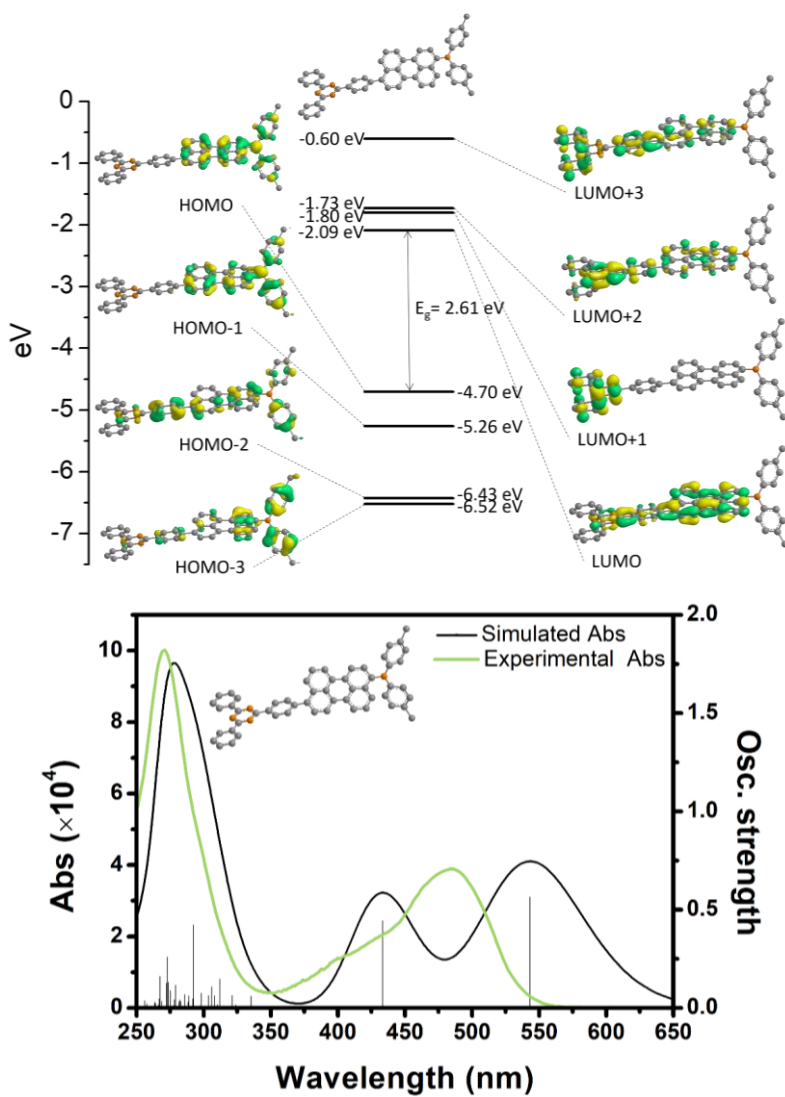

Figure S24. (Up): Energy levels and isodensity plots (isodensity contour = 0.035 a.u.) of 3c (Down): Electronic transition of the simulated/experimental absorption spectra of 3c

Table S9. TD-DFT calculation: Transition assignment of **3c**

| No. | Excitation Energy<br>( $cm^{-1}$ ) | Wavelength<br>(nm) | Oscillator<br>strength | Assignment                                                             |
|-----|------------------------------------|--------------------|------------------------|------------------------------------------------------------------------|
| 1   | 18410.41139                        | 543.17             | 0.5657                 | HOMO->LUMO (96%)                                                       |
| 2   | 21393.04967                        | 467.44             | 0.0012                 | H-1->LUMO (14%), HOMO->L+1 (10%),<br>HOMO->L+2 (73%)                   |
| 3   | 21522.09838                        | 464.63             | 0.0004                 | HOMO->L+1 (89%)                                                        |
| 4   | 23083.58775                        | 433.20             | 0.4433                 | H-1->LUMO (80%), HOMO->L+2 (17%)                                       |
| 5   | 25973.47227                        | 385.00             | 0.0058                 | H-1->L+1 (12%), H-1->L+2 (83%)                                         |
| 6   | 26084.77678                        | 383.36             | 0.0006                 | H-1->L+1 (86%), H-1->L+2 (12%)                                         |
| 7   | 28186.65763                        | 354.77             | 0.004                  | HOMO->L+4 (83%)                                                        |
| 8   | 29814.28446                        | 335.40             | 0.0598                 | HOMO->L+3 (76%), HOMO->L+6 (12%)                                       |
| 9   | 30889.42152                        | 323.73             | 0.0147                 | H-8->LUMO (10%), H-4->LUMO (12%), H-1->L+4 (12%), HOMO->L+5 (40%)      |
| 10  | 31138.64684                        | 321.14             | 0.0641                 | H-2->LUMO (63%)                                                        |
| 11  | 32054.89267                        | 311.96             | 0.1471                 | H-3->LUMO (39%), HOMO->L+3 (11%),<br>HOMO->L+6 (15%)                   |
| 12  | 32220.23632                        | 310.36             | 0.016                  | H-9->LUMO (14%), H-8->LUMO (11%), H-4->LUMO (13%)                      |
| 13  | 32422.68149                        | 308.42             | 0.0036                 | H-6->LUMO (33%), H-6->L+2 (16%), H-2->L+1 (25%)                        |
| 14  | 32435.58636                        | 308.30             | 0.0621                 | H-4->LUMO (15%), HOMO->L+5 (19%),<br>HOMO->L+12 (12%)                  |
| 15  | 32595.28413                        | 306.79             | 0.0034                 | H-15->L+1 (17%), H-14->LUMO (33%), H-14->L+2 (31%)                     |
| 16  | 32687.23134                        | 305.92             | 0.1083                 | HOMO->L+7 (51%), HOMO->L+8 (22%)                                       |
| 17  | 32944.52220                        | 303.54             | 0.064                  | H-3->LUMO (23%), HOMO->L+6 (18%),<br>HOMO->L+7 (10%), HOMO->L+12 (12%) |
| 18  | 33004.20723                        | 302.99             | 0.0005                 | H-15->LUMO (46%), H-15->L+2 (46%)                                      |
| 19  | 33180.84265                        | 301.37             | 0.0001                 | H-15->L+1 (80%)                                                        |
| 20  | 33374.41571                        | 299.63             | 0.0023                 | HOMO->L+6 (12%), HOMO->L+7 (11%),<br>HOMO->L+8 (33%)                   |

Table S10. Cartesian coordinates for optimized structure for **3d**

Symbolic Z-matrix:  
Charge = 0 Multiplicity = 1

| Atom | X        | Y        | Z        | Atom | X        | Y        | Z        |
|------|----------|----------|----------|------|----------|----------|----------|
| C    | -4.1635  | 0.470224 | 1.841516 | C    | 10.49949 | 3.135095 | -3.32862 |
| C    | -5.53397 | 0.340669 | 1.586867 | C    | 9.674761 | 2.35511  | -2.52234 |
| C    | -6.01146 | 0.171539 | 0.298501 | C    | 11.09491 | -1.81379 | 2.155573 |
| C    | -5.07933 | 0.142075 | -0.79186 | C    | 11.65304 | -2.65367 | 3.115666 |
| C    | -5.51693 | 0.059146 | -2.13713 | C    | 10.829   | -3.43561 | 3.928452 |
| C    | -4.60363 | 0.03042  | -3.16659 | C    | 9.441863 | -3.37371 | 3.776335 |
| C    | -3.22615 | 0.061392 | -2.89905 | C    | 8.880024 | -2.53512 | 2.8173   |
| C    | -2.73699 | 0.149232 | -1.5996  | O    | -10.8619 | 3.638525 | 2.646598 |
| C    | -1.29022 | 0.163501 | -1.31158 | O    | -9.55149 | -4.59715 | -2.22964 |
| C    | -0.33988 | -0.01974 | -2.3098  | C    | -10.662  | 5.040043 | 2.568562 |
| C    | 1.033646 | 0.002368 | -2.03677 | C    | -8.93266 | -5.86193 | -2.06538 |
| C    | 1.520599 | 0.212403 | -0.75699 | H    | -3.85508 | 0.584765 | 2.873894 |
| C    | 0.580177 | 0.437346 | 0.304075 | H    | -6.23791 | 0.367626 | 2.412005 |
| C    | 1.005296 | 0.759967 | 1.6195   | H    | -6.57865 | 0.028696 | -2.34573 |
| C    | 0.086579 | 0.973382 | 2.621942 | H    | -4.94609 | -0.01815 | -4.19596 |
| C    | -1.28823 | 0.861052 | 2.366284 | H    | -2.54238 | 0.030035 | -3.73892 |
| C    | -1.77064 | 0.558739 | 1.096623 | H    | -0.64758 | -0.2098  | -3.33099 |
| C    | -0.83126 | 0.379993 | 0.027512 | H    | 1.734287 | -0.18244 | -2.84549 |
| C    | -3.21261 | 0.418854 | 0.826702 | H    | 2.063903 | 0.859537 | 1.824931 |
| C    | -3.67136 | 0.228973 | -0.51585 | H    | 0.42365  | 1.234673 | 3.620758 |
| N    | -7.41007 | 0.051681 | 0.062557 | H    | -1.97643 | 1.03551  | 3.18466  |
| C    | 2.991042 | 0.17876  | -0.53979 | H    | -9.57523 | -0.52865 | 1.577155 |
| C    | -7.93508 | -1.1526  | -0.48715 | H    | -11.0721 | 1.11559  | 2.684555 |
| C    | -8.28536 | 0.970829 | 0.713576 | H    | -8.67169 | 4.328285 | 1.138258 |
| C    | -9.3823  | 0.533979 | 1.476401 | H    | -7.21583 | 2.699173 | 0.014632 |
| C    | -10.2231 | 1.448356 | 2.096375 | H    | -9.60825 | -0.17687 | -1.44071 |
| C    | -9.98008 | 2.824985 | 1.99065  | H    | -10.5202 | -2.26526 | -2.42649 |
| C    | -8.88371 | 3.271037 | 1.243664 | H    | -7.27701 | -4.48729 | -0.69125 |
| C    | -8.05594 | 2.347074 | 0.604566 | H    | -6.40173 | -2.42969 | 0.315963 |
| C    | -9.10419 | -1.12261 | -1.2712  | H    | 2.946648 | -1.30264 | 1.028384 |
| C    | -9.61811 | -2.28563 | -1.82383 | H    | 5.405939 | -1.39524 | 1.296951 |
| C    | -8.96854 | -3.5144  | -1.63036 | H    | 5.870166 | 1.514591 | -1.81033 |
| C    | -7.80144 | -3.55487 | -0.8629  | H    | 3.407743 | 1.629018 | -2.07754 |
| C    | -7.30096 | -2.38283 | -0.28877 | H    | 12.04663 | 0.799011 | -0.65201 |
| C    | 3.580659 | -0.67029 | 0.415065 | H    | 13.52463 | 2.190729 | -2.08996 |
| C    | 4.960845 | -0.73128 | 0.565395 | H    | 12.52895 | 3.687869 | -3.80572 |
| C    | 5.802682 | 0.056675 | -0.23512 | H    | 10.06054 | 3.788104 | -4.07717 |
| C    | 5.223441 | 0.902348 | -1.19305 | H    | 8.597272 | 2.389703 | -2.63073 |
| C    | 3.842504 | 0.95921  | -1.3418  | H    | 11.72309 | -1.20222 | 1.518944 |
| C    | 7.273532 | -0.00544 | -0.07324 | H    | 12.73197 | -2.69906 | 3.230837 |
| N    | 7.768236 | -0.82828 | 0.864906 | H    | 11.26588 | -4.09036 | 4.677039 |
| C    | 9.105248 | -0.85222 | 0.974955 | H    | 8.797808 | -3.98016 | 4.406285 |
| N    | 9.937218 | -0.11849 | 0.219619 | H    | 7.805639 | -2.47802 | 2.689375 |
| C    | 9.353237 | 0.675384 | -0.69139 | H    | -11.4628 | 5.492643 | 3.155197 |
| N    | 8.027024 | 0.764555 | -0.87407 | H    | -9.69358 | 5.336726 | 2.992245 |
| C    | 10.23018 | 1.507291 | -1.55136 | H    | -10.7246 | 5.40267  | 1.534249 |
| C    | 9.701921 | -1.74649 | 1.997159 | H    | -9.54751 | -6.57368 | -2.61835 |

|   |          |          |          |   |          |          |          |
|---|----------|----------|----------|---|----------|----------|----------|
| C | 11.62501 | 1.455742 | -1.40358 | H | -7.91386 | -5.87215 | -2.47444 |
| C | 12.44646 | 2.237298 | -2.2117  | H | -8.8956  | -6.16244 | -1.01003 |
| C | 11.88681 | 3.078727 | -3.176   |   |          |          |          |



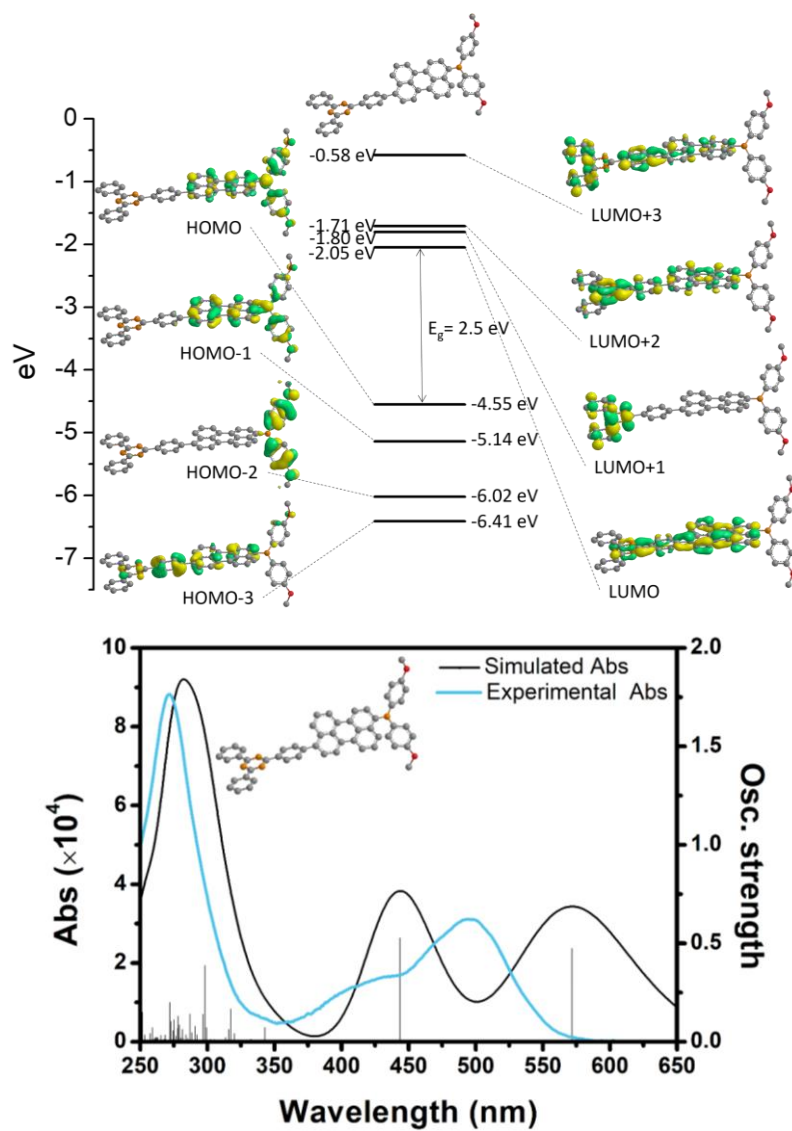

Figure S25. (Up): Energy levels and isodensity plots (isodensity contour = 0.035 a.u.) of **3d** (Down): Electronic transition of the simulated/experimental absorption spectra of **3d**

Table S11. TD-DFT calculation: Transition assignment of **3d**

| No. | Excitation Energy<br>( $cm^{-1}$ ) | Wavelength<br>(nm) | Oscillator<br>strength | Assignment                                                                                          |
|-----|------------------------------------|--------------------|------------------------|-----------------------------------------------------------------------------------------------------|
| 1   | 17490.93934                        | 571.72             | 0.4739                 | HOMO->LUMO (96%)                                                                                    |
| 2   | 20538.10198                        | 486.89             | 0.0006                 | HOMO->L+1 (72%), HOMO->L+2 (24%)                                                                    |
| 3   | 20614.72465                        | 485.09             | 0.0006                 | HOMO->L+1 (27%), HOMO->L+2 (64%)                                                                    |
| 4   | 22552.06838                        | 443.41             | 0.5278                 | H-1->LUMO (87%), HOMO->L+2 (11%)                                                                    |
| 5   | 25070.93787                        | 398.86             | 0.0001                 | H-1->L+1 (95%)                                                                                      |
| 6   | 25231.44220                        | 396.33             | 0.0025                 | H-1->L+2 (93%)                                                                                      |
| 7   | 27587.38768                        | 362.48             | 0.0061                 | HOMO->L+4 (86%)                                                                                     |
| 8   | 29019.02180                        | 344.60             | 0.0092                 | H-2->LUMO (88%)                                                                                     |
| 9   | 29167.42781                        | 342.84             | 0.0726                 | HOMO->L+3 (80%), HOMO->L+6 (11%)                                                                    |
| 10  | 30082.86709                        | 332.41             | 0.0127                 | H-4->LUMO (10%), H-1->L+4 (11%), HOMO->L+5 (67%)                                                    |
| 11  | 31237.04648                        | 320.13             | 0.042                  | H-4->LUMO (24%), H-3->LUMO (39%), HOMO->L+6 (10%), H-4->L+2 (3%), H-3->L+2 (2%), HOMO->L+5 (4%)     |
| 12  | 31509.66187                        | 317.36             | 0.1677                 | H-3->LUMO (16%), HOMO->L+6 (39%), HOMO->L+11 (10%), HOMO->L+3 (9%)                                  |
| 13  | 31655.64822                        | 315.89             | 0.0638                 | H-7->LUMO (16%), H-3->LUMO (12%), HOMO->L+10 (10%), HOMO->L+11 (13%), H-4->LUMO (6%), H-1->L+4 (3%) |
| 14  | 31893.58178                        | 313.54             | 0.0209                 | H-4->LUMO (14%), H-3->LUMO (15%), H-1->L+4 (19%)                                                    |
| 15  | 32329.12117                        | 309.31             | 0.0013                 | H-5->LUMO (28%), H-5->L+2 (12%), H-3->L+1 (33%), H-2->L+1 (14%)                                     |
| 16  | 32599.31691                        | 306.75             | 0.0004                 | H-16->LUMO (40%), H-16->L+2 (33%), H-15->L+1 (17%)                                                  |
| 17  | 32633.99875                        | 306.42             | 0.0049                 | HOMO->L+6 (10%), HOMO->L+7 (37%), HOMO->L+10 (16%)                                                  |
| 18  | 32763.04746                        | 305.22             | 0.0116                 | H-2->L+2 (73%)                                                                                      |
| 19  | 32859.83399                        | 304.32             | 0.0022                 | H-2->L+1 (77%)                                                                                      |
| 20  | 33021.95143                        | 302.82             | 0.0018                 | H-15->LUMO (52%), H-15->L+2 (44%)                                                                   |

Table S12. The number of imaginary frequencies, total energies, and dipole moments for the compound **3a<sup>+</sup>–3d<sup>+</sup>** as obtained in the geometry optimizations at  $\omega$ B97XD/6-31+G method

| Entry                 | Number of<br>imaginary<br>frequencies | Total energies<br>(Eh)<br>(Hartrees) | Doublet state dipole moment<br>(field-independent basis, Debye) |
|-----------------------|---------------------------------------|--------------------------------------|-----------------------------------------------------------------|
| <b>3a<sup>+</sup></b> | -1                                    | -2456.99756154                       | 9.2913                                                          |
| <b>3b<sup>+</sup></b> | -1                                    | -2258.56417008                       | 7.9921                                                          |
| <b>3c<sup>+</sup></b> | -1                                    | -2337.17648297                       | 4.9679                                                          |
| <b>3d<sup>+</sup></b> | -1                                    | -2487.54389717                       | 4.6622                                                          |

Table S13. Cartesian coordinates for optimized structure for **3a<sup>-</sup>**

Symbolic Z-matrix:  
Charge = -1 Multiplicity = 2

| Atom | X        | Y        | Z        | Atom | X        | Y        | Z        |
|------|----------|----------|----------|------|----------|----------|----------|
| C    | 4.547349 | 1.281593 | 1.627884 | C    | -9.78605 | -2.15976 | -0.39447 |
| C    | 5.904441 | 1.211848 | 1.340686 | C    | -11.1767 | -2.01552 | -0.37889 |
| C    | 6.380869 | 0.359733 | 0.359167 | C    | -11.999  | -3.12423 | -0.55415 |
| C    | 5.48665  | -0.4602  | -0.38133 | C    | -11.4401 | -4.38695 | -0.74643 |
| C    | 5.949733 | -1.36447 | -1.36408 | C    | -10.0538 | -4.5356  | -0.76265 |
| C    | 5.044227 | -2.14474 | -2.06453 | C    | -9.23002 | -3.42821 | -0.58767 |
| C    | 3.67775  | -2.04639 | -1.83079 | C    | -10.6343 | 2.757606 | 0.352581 |
| C    | 3.157946 | -1.15932 | -0.86629 | C    | -11.1864 | 4.020198 | 0.545367 |
| C    | 1.737048 | -1.02617 | -0.62894 | C    | -10.3574 | 5.126379 | 0.727119 |
| C    | 0.784143 | -1.72713 | -1.39946 | C    | -8.97267 | 4.963743 | 0.715091 |
| C    | -0.57203 | -1.58103 | -1.18395 | C    | -8.41877 | 3.702193 | 0.522191 |
| C    | -1.08561 | -0.73564 | -0.19363 | F    | 9.702707 | 2.497677 | -4.62534 |
| C    | -0.15439 | -0.05567 | 0.666726 | F    | 10.95507 | -2.0748  | 3.984368 |
| C    | -0.57694 | 0.677794 | 1.796335 | H    | 4.223938 | 1.972563 | 2.397303 |
| C    | 0.337914 | 1.335301 | 2.603915 | H    | 6.611987 | 1.830382 | 1.889047 |
| C    | 1.69527  | 1.296759 | 2.317359 | H    | 7.014041 | -1.44274 | -1.56132 |
| C    | 2.185697 | 0.554584 | 1.229582 | H    | 5.406742 | -2.8458  | -2.81352 |
| C    | 1.261792 | -0.17262 | 0.414369 | H    | 3.012086 | -2.68012 | -2.40516 |
| C    | 3.608674 | 0.502272 | 0.92582  | H    | 1.102727 | -2.367   | -2.21424 |
| C    | 4.077246 | -0.36544 | -0.10657 | H    | -1.26378 | -2.09329 | -1.84951 |
| N    | 7.789256 | 0.30265  | 0.099587 | H    | -1.62915 | 0.700734 | 2.058003 |
| C    | -2.53889 | -0.55943 | -0.11038 | H    | -0.01168 | 1.882205 | 3.476991 |
| C    | 8.297614 | 0.865758 | -1.08132 | H    | 2.377213 | 1.825062 | 2.973821 |
| C    | 8.615809 | -0.30295 | 1.064776 | H    | 10.04054 | -0.40465 | -1.19836 |
| C    | 9.487664 | 0.403523 | -1.66605 | H    | 10.88624 | 0.597302 | -3.30116 |
| C    | 9.966469 | 0.95576  | -2.84982 | H    | 7.489003 | 3.198287 | -3.44509 |
| C    | 9.238998 | 1.960008 | -3.46504 | H    | 6.64313  | 2.221465 | -1.32104 |
| C    | 8.047356 | 2.421206 | -2.93321 | H    | 10.22509 | 1.120225 | 0.89118  |
| C    | 7.581646 | 1.875903 | -1.74148 | H    | 11.63646 | 0.036254 | 2.630973 |
| C    | 9.870293 | 0.227413 | 1.396764 | H    | 8.593237 | -2.90711 | 3.277149 |
| C    | 10.66496 | -0.37152 | 2.370323 | H    | 7.185901 | -1.84548 | 1.513471 |
| C    | 10.1856  | -1.49179 | 3.027332 | H    | -2.5069  | 1.585749 | 0.126832 |
| C    | 8.941829 | -2.03058 | 2.740749 | H    | -4.95029 | 1.850907 | 0.162922 |
| C    | 8.162392 | -1.43686 | 1.754053 | H    | -5.42725 | -2.38141 | -0.34556 |
| C    | -3.1412  | 0.708101 | 0.047617 | H    | -2.98138 | -2.6567  | -0.35813 |
| C    | -4.51512 | 0.862118 | 0.05925  | H    | -11.6004 | -1.02828 | -0.22853 |
| C    | -5.36702 | -0.24696 | -0.08169 | H    | -13.0788 | -3.00257 | -0.54065 |
| C    | -4.78361 | -1.51326 | -0.24518 | H    | -12.0828 | -5.25263 | -0.88331 |
| C    | -3.40793 | -1.6622  | -0.25926 | H    | -9.61242 | -5.51706 | -0.9121  |
| C    | -6.82029 | -0.08594 | -0.06185 | H    | -8.1501  | -3.53045 | -0.59866 |
| N    | -7.32678 | 1.145922 | 0.12634  | H    | -11.2694 | 1.889706 | 0.21044  |
| C    | -8.65229 | 1.240629 | 0.133899 | H    | -12.2663 | 4.141234 | 0.55397  |
| N    | -9.49286 | 0.212303 | -0.0282  | H    | -10.7891 | 6.112329 | 0.877861 |
| C    | -8.90374 | -0.97555 | -0.20799 | H    | -8.3215  | 5.821846 | 0.856513 |
| N    | -7.59034 | -1.17576 | -0.23354 | H    | -7.34303 | 3.562966 | 0.511265 |
| C    | -9.24622 | 2.589758 | 0.339475 |      |          |          |          |

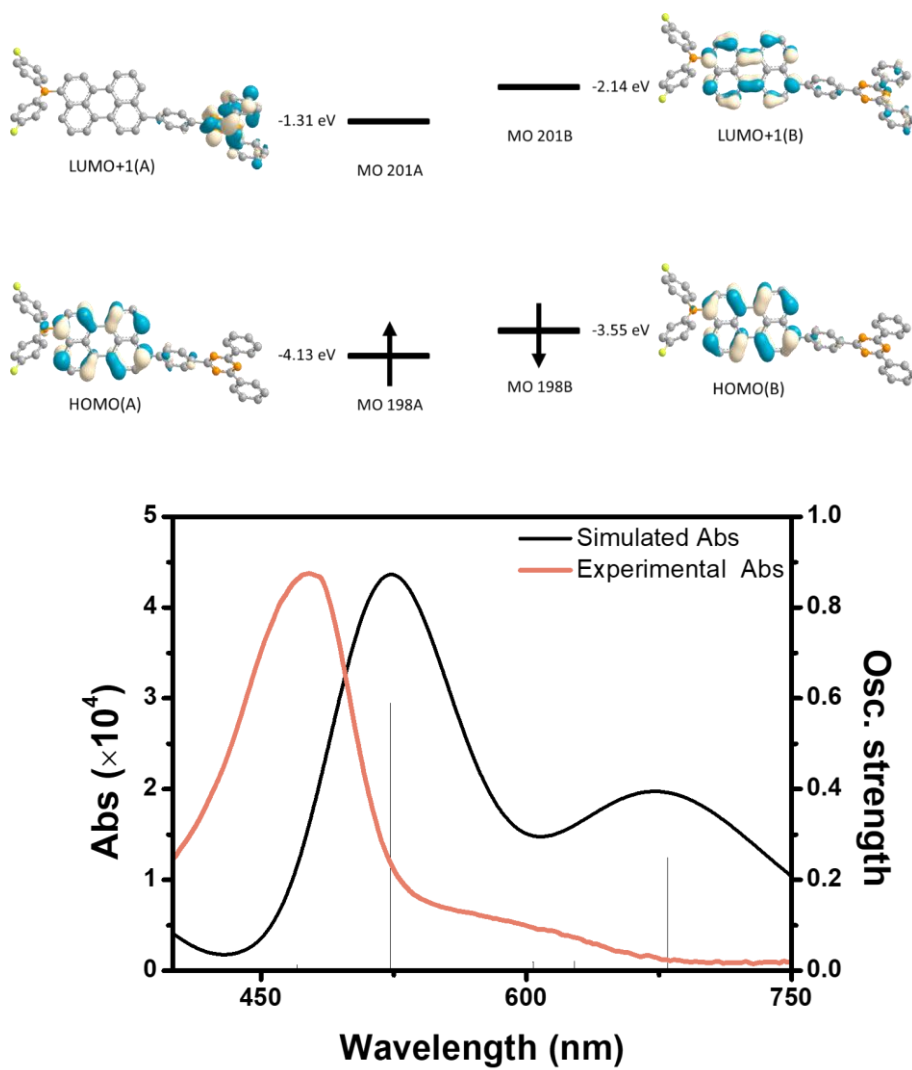

Figure S26. (Up): Energy levels and isodensity plots (isodensity contour = 0.035 a.u.) of  $3a^-$  (Down): Electronic transition of the simulated/SEC experimental absorption spectra of  $3a^-$

Table S14. TD-DFT calculation: Transition assignment of **3a**<sup>+</sup>

| Excited State | 3: 2.130-?Sym | 1.8235 eV | 679.94 nm | f=0.2485 | <S**2>=0.884          |
|---------------|---------------|-----------|-----------|----------|-----------------------|
| 178A -> 263A  | -0.01043      |           |           |          | 192B -> 230B -0.01537 |
| 179A -> 263A  | -0.01158      |           |           |          | 192B -> 237B 0.01622  |
| 179A -> 266A  | 0.01149       |           |           |          | 192B -> 242B 0.02099  |
| 179A -> 284A  | -0.01401      |           |           |          | 192B -> 243B -0.01200 |
| 179A -> 300A  | -0.01122      |           |           |          | 192B -> 244B -0.01034 |
| 188A -> 201A  | 0.01191       |           |           |          | 193B -> 216B 0.02402  |
| 191A -> 215A  | 0.01192       |           |           |          | 193B -> 217B -0.01059 |
| 192A -> 213A  | -0.02322      |           |           |          | 193B -> 231B -0.01350 |
| 192A -> 217A  | -0.01209      |           |           |          | 193B -> 232B -0.03492 |
| 192A -> 234A  | 0.01221       |           |           |          | 193B -> 233B 0.03409  |
| 192A -> 237A  | 0.01167       |           |           |          | 193B -> 237B 0.01322  |
| 192A -> 242A  | 0.01666       |           |           |          | 194B -> 214B 0.01437  |
| 193A -> 213A  | -0.01851      |           |           |          | 194B -> 216B 0.03005  |
| 193A -> 233A  | -0.02068      |           |           |          | 194B -> 224B -0.01041 |
| 194A -> 200A  | -0.01512      |           |           |          | 194B -> 226B 0.01436  |
| 194A -> 202A  | 0.01461       |           |           |          | 194B -> 228B -0.02142 |
| 194A -> 213A  | -0.03494      |           |           |          | 194B -> 230B 0.08150  |
| 194A -> 215A  | -0.02406      |           |           |          | 194B -> 231B -0.04250 |
| 194A -> 216A  | 0.01040       |           |           |          | 194B -> 233B -0.03754 |
| 194A -> 217A  | 0.01890       |           |           |          | 194B -> 236B 0.01371  |
| 194A -> 218A  | 0.01067       |           |           |          | 194B -> 240B 0.01056  |
| 194A -> 221A  | 0.01595       |           |           |          | 194B -> 259B 0.01022  |
| 194A -> 222A  | -0.03814      |           |           |          | 195B -> 216B -0.05175 |
| 194A -> 223A  | -0.01160      |           |           |          | 195B -> 217B 0.03164  |
| 194A -> 224A  | -0.01301      |           |           |          | 195B -> 218B -0.01334 |
| 194A -> 233A  | 0.01244       |           |           |          | 195B -> 219B 0.01497  |
| 195A -> 202A  | -0.01870      |           |           |          | 195B -> 232B -0.01674 |
| 195A -> 212A  | -0.01403      |           |           |          | 195B -> 233B 0.01386  |
| 195A -> 213A  | 0.03482       |           |           |          | 196B -> 200B 0.02888  |
| 196A -> 202A  | -0.01682      |           |           |          | 196B -> 201B 0.05283  |
| 196A -> 213A  | 0.02660       |           |           |          | 196B -> 202B 0.05257  |
| 196A -> 221A  | -0.01807      |           |           |          | 196B -> 203B -0.01136 |
| 196A -> 222A  | 0.02815       |           |           |          | 196B -> 204B 0.03301  |
| 197A -> 200A  | -0.01461      |           |           |          | 196B -> 205B -0.01825 |
| 197A -> 213A  | 0.01921       |           |           |          | 196B -> 215B -0.01022 |
| 197A -> 222A  | 0.01115       |           |           |          | 196B -> 216B -0.02129 |
| 198A -> 200A  | 0.11761       |           |           |          | 196B -> 218B 0.01226  |
| 198A -> 201A  | 0.04742       |           |           |          | 196B -> 220B 0.04044  |
| 198A -> 202A  | -0.04500      |           |           |          | 196B -> 221B -0.03685 |
| 198A -> 203A  | -0.01282      |           |           |          | 196B -> 222B -0.01189 |
| 198A -> 205A  | 0.01640       |           |           |          | 196B -> 223B -0.01014 |
| 198A -> 217A  | 0.01004       |           |           |          | 196B -> 227B 0.01279  |
| 198A -> 233A  | -0.01237      |           |           |          | 196B -> 228B 0.01383  |
| 198A -> 256A  | -0.01754      |           |           |          | 196B -> 229B -0.01308 |
| 198A -> 259A  | -0.01668      |           |           |          | 196B -> 230B 0.03442  |
| 198A -> 263A  | -0.01525      |           |           |          | 196B -> 231B -0.01901 |
| 198A -> 265A  | -0.01001      |           |           |          | 196B -> 232B 0.01274  |
| 199A -> 200A  | 0.09745       |           |           |          | 196B -> 236B 0.01672  |
| 199A -> 201A  | 0.02694       |           |           |          | 196B -> 237B -0.01444 |
| 199A -> 202A  | 0.09501       |           |           |          | 196B -> 239B -0.01211 |
| 199A -> 203A  | 0.03618       |           |           |          | 196B -> 241B -0.01168 |

|              |          |              |          |
|--------------|----------|--------------|----------|
| 199A -> 204A | -0.01986 | 196B -> 242B | -0.01489 |
| 199A -> 205A | -0.02924 | 196B -> 243B | 0.01147  |
| 199A -> 209A | -0.06337 | 196B -> 244B | 0.01221  |
| 199A -> 210A | -0.03446 | 196B -> 249B | -0.01135 |
| 199A -> 211A | -0.03863 | 197B -> 200B | 0.03478  |
| 199A -> 212A | 0.05961  | 197B -> 201B | -0.02256 |
| 199A -> 213A | -0.09157 | 197B -> 202B | 0.01599  |
| 199A -> 215A | 0.18146  | 197B -> 204B | 0.01531  |
| 199A -> 216A | -0.04063 | 197B -> 215B | -0.01333 |
| 199A -> 217A | -0.18218 | 197B -> 216B | -0.01816 |
| 199A -> 218A | -0.07642 | 197B -> 218B | 0.01314  |
| 199A -> 219A | 0.05766  | 197B -> 220B | 0.03423  |
| 199A -> 220A | -0.01457 | 197B -> 221B | -0.02697 |
| 199A -> 221A | -0.05544 | 197B -> 230B | 0.01235  |
| 199A -> 222A | 0.13789  | 197B -> 237B | -0.01365 |
| 199A -> 223A | 0.03999  | 197B -> 242B | -0.01220 |
| 199A -> 224A | 0.04855  | 198B -> 199B | -0.04890 |
| 199A -> 225A | 0.03456  | 198B -> 200B | -0.39435 |
| 199A -> 227A | -0.01554 | 198B -> 201B | 0.75646  |
| 199A -> 228A | -0.01225 | 198B -> 202B | 0.16021  |
| 199A -> 229A | -0.01494 | 198B -> 203B | -0.02261 |
| 199A -> 232A | 0.01355  | 198B -> 204B | 0.05054  |
| 199A -> 233A | -0.01618 | 198B -> 205B | -0.08603 |
| 199A -> 234A | 0.03325  | 198B -> 208B | -0.01699 |
| 199A -> 236A | 0.02191  | 198B -> 209B | -0.01779 |
| 199A -> 237A | 0.04015  | 198B -> 210B | 0.02796  |
| 199A -> 239A | -0.02156 | 198B -> 211B | 0.01865  |
| 199A -> 241A | -0.01569 | 198B -> 214B | 0.01479  |
| 199A -> 242A | 0.04381  | 198B -> 215B | 0.01852  |
| 199A -> 243A | 0.01546  | 198B -> 220B | -0.02893 |
| 199A -> 244A | 0.01501  | 198B -> 221B | 0.02052  |
| 199A -> 248A | 0.01556  | 198B -> 223B | 0.01048  |
| 199A -> 249A | 0.01352  | 198B -> 228B | 0.01430  |
| 199A -> 252A | 0.01625  | 198B -> 232B | 0.01393  |
| 199A -> 256A | -0.01343 | 198B -> 235B | -0.01419 |
| 199A -> 299A | -0.01119 | 198B -> 237B | 0.01173  |
| 178B -> 269B | -0.01165 | 198B -> 242B | 0.01061  |
| 180B -> 201B | -0.01041 | 198B -> 249B | -0.01630 |
| 180B -> 284B | 0.01126  | 198B -> 257B | 0.01426  |
| 191B -> 214B | -0.01486 | 198B -> 259B | 0.01541  |
| 192B -> 201B | 0.02499  | 198B -> 261B | 0.01083  |
| 192B -> 220B | -0.02703 | 198B -> 286B | 0.01328  |
| 192B -> 221B | 0.02127  |              |          |

Table S15. Cartesian coordinates for optimized structure for **3b<sup>+</sup>**

Symbolic Z-matrix:  
Charge = -1 Multiplicity = 2

| Atom | X        | Y        | Z        | Atom | X        | Y        | Z        |
|------|----------|----------|----------|------|----------|----------|----------|
| C    | 4.989029 | 1.487718 | 1.431451 | C    | -9.35421 | -2.18906 | -0.05769 |
| C    | 6.346722 | 1.377876 | 1.155288 | C    | -10.1942 | 2.787631 | -0.09585 |
| C    | 6.819436 | 0.409474 | 0.288346 | C    | -10.7434 | 4.066192 | -0.10668 |
| C    | 5.921824 | -0.49571 | -0.33965 | C    | -9.9119  | 5.185343 | -0.10488 |
| C    | 6.382917 | -1.51674 | -1.20198 | C    | -8.52755 | 5.019456 | -0.09222 |
| C    | 5.476449 | -2.38006 | -1.79296 | C    | -7.97673 | 3.741962 | -0.08157 |
| C    | 4.110116 | -2.25659 | -1.56468 | C    | -10.7447 | -2.04206 | -0.06209 |
| C    | 3.592365 | -1.25674 | -0.71763 | C    | -11.569  | -3.16315 | -0.05762 |
| C    | 2.172654 | -1.10182 | -0.48634 | C    | -11.0124 | -4.44138 | -0.04867 |
| C    | 1.218644 | -1.91656 | -1.13485 | C    | -9.62632 | -4.59293 | -0.04426 |
| C    | -0.13655 | -1.74652 | -0.93677 | C    | -8.80062 | -3.47317 | -0.04873 |
| C    | -0.65175 | -0.76006 | -0.08567 | H    | 4.669871 | 2.270576 | 2.109102 |
| C    | 0.282168 | 0.041704 | 0.661826 | H    | 7.056645 | 2.057763 | 1.621419 |
| C    | -0.13816 | 0.930218 | 1.673879 | H    | 7.446646 | -1.61595 | -1.39247 |
| C    | 0.776786 | 1.701881 | 2.373344 | H    | 5.836565 | -3.16849 | -2.4507  |
| C    | 2.133342 | 1.623317 | 2.09211  | H    | 3.443594 | -2.95815 | -2.05265 |
| C    | 2.622807 | 0.729193 | 1.125634 | H    | 1.53641  | -2.67255 | -1.84359 |
| C    | 1.698264 | -0.10804 | 0.425005 | H    | -0.82764 | -2.35675 | -1.51443 |
| C    | 4.047761 | 0.629783 | 0.835204 | H    | -1.18918 | 0.98808  | 1.934644 |
| C    | 4.513795 | -0.36724 | -0.0741  | H    | 0.427788 | 2.371132 | 3.156839 |
| N    | 8.227482 | 0.318739 | 0.03439  | H    | 2.814852 | 2.245742 | 2.660515 |
| C    | -2.10242 | -0.57301 | -0.03105 | H    | 10.67546 | 1.205956 | 0.701499 |
| C    | 8.731029 | 0.739382 | -1.20605 | H    | 12.07423 | 0.358671 | 2.546825 |
| C    | 9.052879 | -0.16452 | 1.067471 | H    | 11.25022 | -1.48155 | 4.009263 |
| C    | 10.31537 | 0.390942 | 1.322083 | H    | 8.99502  | -2.45279 | 3.584401 |
| C    | 11.09957 | -0.08852 | 2.366706 | H    | 7.607418 | -1.61716 | 1.719471 |
| C    | 10.63828 | -1.1143  | 3.190073 | H    | 10.4802  | -0.52679 | -1.17083 |
| C    | 9.374997 | -1.65516 | 2.951263 | H    | 11.3131  | 0.205472 | -3.36194 |
| C    | 8.589672 | -1.1921  | 1.901794 | H    | 10.03544 | 1.866161 | -4.71278 |
| C    | 9.923684 | 0.216169 | -1.73337 | H    | 7.893116 | 2.765002 | -3.80887 |
| C    | 10.38793 | 0.628393 | -2.9775  | H    | 7.06892  | 2.048749 | -1.60179 |
| C    | 9.673292 | 1.553045 | -3.73761 | H    | -2.07161 | 1.585497 | -0.09282 |
| C    | 8.476452 | 2.054337 | -3.22892 | H    | -4.51247 | 1.854486 | -0.10194 |
| C    | 8.007939 | 1.659186 | -1.98101 | H    | -4.99339 | -2.40786 | -0.01787 |
| C    | -2.70571 | 0.705247 | -0.0501  | H    | -2.55048 | -2.68476 | 0.010673 |
| C    | -4.07868 | 0.860325 | -0.06505 | H    | -10.8317 | 1.909918 | -0.09706 |
| C    | -4.93334 | -0.25678 | -0.05253 | H    | -11.823  | 4.189492 | -0.11651 |
| C    | -4.34937 | -1.5344  | -0.03795 | H    | -10.3413 | 6.183746 | -0.1133  |
| C    | -2.9747  | -1.68521 | -0.03005 | H    | -7.87427 | 5.887571 | -0.09064 |
| C    | -6.38394 | -0.09323 | -0.05795 | H    | -6.90133 | 3.599808 | -0.07161 |
| N    | -6.89024 | 1.154236 | -0.06393 | H    | -11.1668 | -1.04283 | -0.06894 |
| C    | -8.21492 | 1.250331 | -0.07219 | H    | -12.6485 | -3.03893 | -0.06104 |
| N    | -9.05795 | 0.210833 | -0.07056 | H    | -11.6566 | -5.31674 | -0.04508 |
| C    | -8.46965 | -0.9914  | -0.06204 | H    | -9.18651 | -5.58641 | -0.03716 |
| N    | -7.15733 | -1.19562 | -0.05774 | H    | -7.72087 | -3.57781 | -0.0453  |
| C    | -8.8066  | 2.616395 | -0.08332 |      |          |          |          |



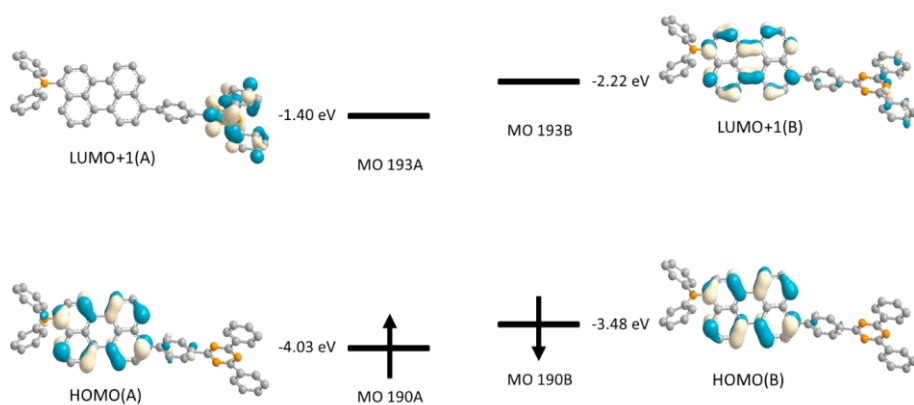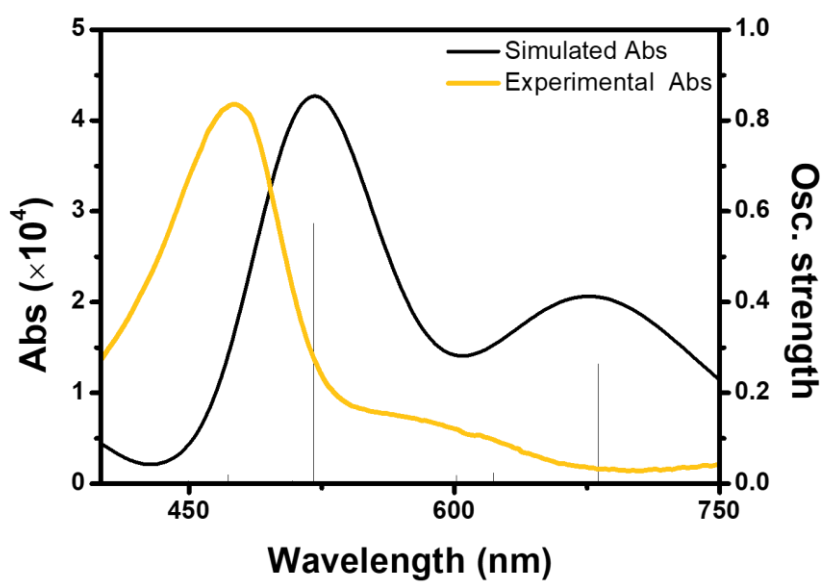

Figure S27. (Up): Energy levels and isodensity plots (isodensity contour = 0.035 a.u.) of  $3b^-$  (Down): Electronic transition of the simulated/SEC experimental absorption spectra of  $3b^-$

Table S16. TD-DFT calculation: Transition assignment of **3b**<sup>+</sup>

| Excited State | 3: 2.159-?Sym | 1.8194 eV | 681.44 nm | f=0.2634 | <S**2>=0.915          |
|---------------|---------------|-----------|-----------|----------|-----------------------|
| 166A -> 300A  | -0.01082      |           |           |          | 184B -> 193B 0.02407  |
| 170A -> 253A  | -0.01166      |           |           |          | 184B -> 208B 0.01328  |
| 171A -> 255A  | -0.01322      |           |           |          | 184B -> 210B -0.01234 |
| 171A -> 258A  | 0.01271       |           |           |          | 184B -> 211B 0.01633  |
| 171A -> 276A  | 0.01136       |           |           |          | 184B -> 212B -0.01082 |
| 171A -> 291A  | -0.01044      |           |           |          | 184B -> 213B -0.02440 |
| 179A -> 193A  | 0.01368       |           |           |          | 184B -> 221B -0.01809 |
| 182A -> 205A  | -0.01251      |           |           |          | 184B -> 228B -0.01318 |
| 182A -> 206A  | 0.01071       |           |           |          | 184B -> 231B 0.01068  |
| 183A -> 208A  | 0.01071       |           |           |          | 184B -> 234B -0.01501 |
| 184A -> 205A  | -0.01663      |           |           |          | 184B -> 235B -0.01125 |
| 184A -> 206A  | 0.01410       |           |           |          | 184B -> 236B -0.01494 |
| 184A -> 228A  | -0.01173      |           |           |          | 184B -> 237B -0.01120 |
| 184A -> 234A  | 0.01283       |           |           |          | 185B -> 208B 0.01578  |
| 185A -> 205A  | -0.01210      |           |           |          | 185B -> 223B 0.01284  |
| 185A -> 206A  | 0.01029       |           |           |          | 185B -> 224B -0.01871 |
| 185A -> 225A  | -0.01997      |           |           |          | 185B -> 225B 0.04701  |
| 186A -> 192A  | -0.01766      |           |           |          | 185B -> 228B -0.01161 |
| 186A -> 194A  | 0.01536       |           |           |          | 185B -> 229B -0.01501 |
| 186A -> 205A  | -0.02416      |           |           |          | 186B -> 206B 0.01006  |
| 186A -> 206A  | 0.02135       |           |           |          | 186B -> 207B 0.01505  |
| 186A -> 207A  | 0.02593       |           |           |          | 186B -> 208B 0.02896  |
| 186A -> 208A  | -0.01765      |           |           |          | 186B -> 218B 0.01060  |
| 186A -> 210A  | -0.01806      |           |           |          | 186B -> 219B 0.01430  |
| 186A -> 211A  | 0.01999       |           |           |          | 186B -> 221B 0.08712  |
| 186A -> 213A  | 0.01415       |           |           |          | 186B -> 223B -0.02454 |
| 186A -> 214A  | -0.02852      |           |           |          | 186B -> 224B -0.02692 |
| 186A -> 215A  | 0.02432       |           |           |          | 186B -> 225B -0.02389 |
| 186A -> 217A  | -0.01416      |           |           |          | 186B -> 226B 0.02420  |
| 186A -> 219A  | -0.01093      |           |           |          | 186B -> 227B -0.01877 |
| 186A -> 225A  | 0.01101       |           |           |          | 186B -> 232B 0.01305  |
| 187A -> 194A  | -0.01699      |           |           |          | 186B -> 251B 0.01260  |
| 187A -> 203A  | -0.01028      |           |           |          | 187B -> 199B 0.01147  |
| 187A -> 205A  | 0.02497       |           |           |          | 187B -> 206B -0.01498 |
| 187A -> 206A  | -0.02229      |           |           |          | 187B -> 208B -0.05837 |
| 187A -> 215A  | 0.01133       |           |           |          | 187B -> 209B -0.02165 |
| 188A -> 194A  | -0.02059      |           |           |          | 187B -> 211B 0.01603  |
| 188A -> 205A  | 0.02598       |           |           |          | 187B -> 214B -0.01291 |
| 188A -> 206A  | -0.02157      |           |           |          | 187B -> 221B 0.01188  |
| 188A -> 213A  | -0.01264      |           |           |          | 187B -> 225B 0.01520  |
| 188A -> 214A  | 0.01751       |           |           |          | 188B -> 192B 0.02544  |
| 188A -> 215A  | -0.02141      |           |           |          | 188B -> 193B 0.05912  |
| 188A -> 219A  | 0.01155       |           |           |          | 188B -> 194B 0.05347  |
| 189A -> 192A  | 0.01884       |           |           |          | 188B -> 195B -0.01085 |
| 189A -> 205A  | -0.01414      |           |           |          | 188B -> 196B 0.04071  |
| 189A -> 206A  | 0.01204       |           |           |          | 188B -> 208B -0.02249 |
| 190A -> 192A  | 0.14806       |           |           |          | 188B -> 209B -0.01365 |
| 190A -> 194A  | -0.05352      |           |           |          | 188B -> 210B 0.01675  |
| 190A -> 195A  | -0.01619      |           |           |          | 188B -> 211B -0.01996 |
| 190A -> 205A  | 0.01453       |           |           |          | 188B -> 212B 0.01423  |
| 190A -> 206A  | -0.01247      |           |           |          | 188B -> 213B 0.03490  |

|              |          |              |          |
|--------------|----------|--------------|----------|
| 190A -> 248A | 0.01954  | 188B -> 214B | -0.01659 |
| 190A -> 252A | -0.01289 | 188B -> 218B | 0.01945  |
| 190A -> 253A | -0.01719 | 188B -> 220B | 0.02220  |
| 190A -> 257A | -0.01061 | 188B -> 221B | 0.03684  |
| 191A -> 192A | 0.09303  | 188B -> 222B | -0.01291 |
| 191A -> 194A | 0.11207  | 188B -> 223B | 0.01563  |
| 191A -> 195A | 0.04154  | 188B -> 224B | 0.01206  |
| 191A -> 196A | 0.02352  | 188B -> 226B | 0.01828  |
| 191A -> 200A | -0.01882 | 188B -> 228B | 0.01475  |
| 191A -> 201A | -0.01239 | 188B -> 231B | -0.01433 |
| 191A -> 203A | 0.06971  | 188B -> 233B | -0.01148 |
| 191A -> 205A | -0.11773 | 188B -> 236B | 0.01375  |
| 191A -> 206A | 0.10018  | 188B -> 240B | -0.01237 |
| 191A -> 207A | -0.10081 | 189B -> 192B | -0.03313 |
| 191A -> 208A | 0.12517  | 189B -> 193B | 0.01958  |
| 191A -> 209A | -0.01243 | 189B -> 194B | -0.01580 |
| 191A -> 210A | 0.11611  | 189B -> 196B | -0.01540 |
| 191A -> 211A | -0.13073 | 189B -> 208B | 0.02053  |
| 191A -> 212A | 0.05988  | 189B -> 210B | -0.01695 |
| 191A -> 213A | -0.05075 | 189B -> 211B | 0.02359  |
| 191A -> 214A | 0.09666  | 189B -> 212B | -0.01369 |
| 191A -> 215A | -0.08919 | 189B -> 213B | -0.02968 |
| 191A -> 216A | 0.01997  | 189B -> 214B | 0.01073  |
| 191A -> 217A | 0.04940  | 189B -> 220B | -0.01003 |
| 191A -> 218A | 0.03447  | 189B -> 221B | -0.01284 |
| 191A -> 221A | -0.01826 | 189B -> 228B | -0.01062 |
| 191A -> 222A | -0.01810 | 189B -> 236B | -0.01061 |
| 191A -> 225A | -0.01887 | 190B -> 191B | -0.05547 |
| 191A -> 226A | 0.01427  | 190B -> 192B | -0.39888 |
| 191A -> 228A | -0.04782 | 190B -> 193B | 0.75348  |
| 191A -> 229A | 0.01611  | 190B -> 194B | 0.16108  |
| 191A -> 230A | -0.03332 | 190B -> 195B | -0.02422 |
| 191A -> 231A | 0.01840  | 190B -> 196B | 0.08327  |
| 191A -> 232A | 0.01410  | 190B -> 199B | -0.04852 |
| 191A -> 233A | -0.02633 | 190B -> 206B | -0.02512 |
| 191A -> 234A | 0.02525  | 190B -> 207B | 0.01584  |
| 191A -> 235A | 0.02376  | 190B -> 208B | 0.01582  |
| 191A -> 236A | 0.01338  | 190B -> 211B | 0.02276  |
| 191A -> 240A | -0.02028 | 190B -> 212B | -0.01260 |
| 191A -> 241A | -0.01001 | 190B -> 213B | -0.03045 |
| 191A -> 244A | 0.01678  | 190B -> 216B | 0.01074  |
| 191A -> 248A | 0.01028  | 190B -> 223B | 0.01247  |
| 191A -> 251A | 0.01740  | 190B -> 224B | 0.01639  |
| 191A -> 279A | 0.01031  | 190B -> 226B | 0.01140  |
| 170B -> 257B | 0.01099  | 190B -> 228B | -0.01151 |
| 170B -> 261B | -0.01260 | 190B -> 234B | -0.01299 |
| 172B -> 193B | -0.01061 | 190B -> 241B | -0.01521 |
| 172B -> 258B | -0.01220 | 190B -> 249B | 0.01813  |
| 172B -> 276B | 0.01150  | 190B -> 253B | 0.01346  |
| 181B -> 221B | -0.01056 | 190B -> 269B | 0.01008  |
| 183B -> 207B | -0.01572 | 190B -> 276B | -0.01356 |

Table S17. Cartesian coordinates for optimized structure for  $3c^{2-}$ 

Symbolic Z-matrix:  
Charge = -1 Multiplicity = 2

| Atom | X        | Y        | Z        | Atom | X        | Y        | Z        |
|------|----------|----------|----------|------|----------|----------|----------|
| C    | 4.543415 | 1.27349  | 1.627652 | C    | -11.4559 | -4.36278 | -0.83517 |
| C    | 5.90109  | 1.206804 | 1.335356 | C    | -10.0698 | -4.51462 | -0.84845 |
| C    | 6.376043 | 0.357667 | 0.352615 | C    | -9.24393 | -3.41252 | -0.65126 |
| C    | 5.479398 | -0.46319 | -0.38394 | C    | -10.6354 | 2.760587 | 0.387961 |
| C    | 5.941524 | -1.36594 | -1.36943 | C    | -11.1853 | 4.021271 | 0.599296 |
| C    | 5.035977 | -2.14818 | -2.06475 | C    | -10.3546 | 5.121835 | 0.805454 |
| C    | 3.668855 | -2.05447 | -1.82458 | C    | -8.97027 | 4.955258 | 0.799117 |
| C    | 3.150203 | -1.16991 | -0.85886 | C    | -8.4187  | 3.695629 | 0.587623 |
| C    | 1.730187 | -1.04046 | -0.61517 | C    | 11.07138 | -2.11348 | 4.143746 |
| C    | 0.774992 | -1.74669 | -1.37915 | C    | 9.732562 | 2.57282  | -4.82657 |
| C    | -0.57985 | -1.60317 | -1.16103 | H    | 4.221757 | 1.963731 | 2.398596 |
| C    | -1.0954  | -0.75241 | -0.17331 | H    | 6.609377 | 1.825965 | 1.881699 |
| C    | -0.15959 | -0.07215 | 0.685445 | H    | 7.005188 | -1.43942 | -1.57098 |
| C    | -0.57745 | 0.654553 | 1.819936 | H    | 5.397022 | -2.84799 | -2.81567 |
| C    | 0.338612 | 1.313009 | 2.625807 | H    | 3.00297  | -2.69037 | -2.39641 |
| C    | 1.694431 | 1.280226 | 2.331374 | H    | 1.092361 | -2.38802 | -2.19343 |
| C    | 2.18089  | 0.542045 | 1.240408 | H    | -1.27082 | -2.11716 | -1.82577 |
| C    | 1.255991 | -0.18639 | 0.428256 | H    | -1.62795 | 0.6712   | 2.088641 |
| C    | 3.604941 | 0.493464 | 0.930542 | H    | -0.00874 | 1.855072 | 3.502751 |
| C    | 4.071715 | -0.37285 | -0.10344 | H    | 2.378401 | 1.809434 | 2.985113 |
| N    | 7.783229 | 0.303232 | 0.089078 | H    | 10.23261 | 1.118893 | 0.854258 |
| C    | -2.54446 | -0.57235 | -0.09386 | H    | 11.63438 | 0.076198 | 2.584559 |
| C    | 8.284805 | 0.863882 | -1.0963  | H    | 8.576937 | -2.84359 | 3.30387  |
| C    | 8.613982 | -0.28687 | 1.060941 | H    | 7.183266 | -1.81635 | 1.552778 |
| C    | 9.872369 | 0.237984 | 1.377277 | H    | 10.03742 | -0.3904  | -1.21442 |
| C    | 10.66041 | -0.3555  | 2.360366 | H    | 10.85808 | 0.582652 | -3.30665 |
| C    | 10.22176 | -1.47095 | 3.074459 | H    | 7.436284 | 3.159568 | -3.45854 |
| C    | 8.954212 | -1.97645 | 2.764546 | H    | 6.620558 | 2.206013 | -1.34854 |
| C    | 8.163222 | -1.40568 | 1.776783 | H    | -2.51203 | 1.568495 | 0.193468 |
| C    | 9.474539 | 0.410002 | -1.68444 | H    | -4.95148 | 1.83948  | 0.221657 |
| C    | 9.932186 | 0.961455 | -2.87673 | H    | -5.43877 | -2.3795  | -0.38767 |
| C    | 9.225315 | 1.964802 | -3.54175 | H    | -2.99751 | -2.66244 | -0.39563 |
| C    | 8.027457 | 2.391779 | -2.96246 | H    | -11.6088 | -1.01281 | -0.26031 |
| C    | 7.561763 | 1.862396 | -1.7655  | H    | -13.0916 | -2.97764 | -0.61209 |
| C    | -3.14692 | 0.693601 | 0.0925   | H    | -12.1003 | -5.22433 | -0.98937 |
| C    | -4.51933 | 0.851469 | 0.098888 | H    | -9.63028 | -5.49456 | -1.01288 |
| C    | -5.3764  | -0.25113 | -0.07275 | H    | -8.16415 | -3.51687 | -0.65949 |
| C    | -4.79345 | -1.5155  | -0.26423 | H    | -11.2717 | 1.896889 | 0.226661 |
| C    | -3.41957 | -1.66831 | -0.27616 | H    | -12.265  | 4.145154 | 0.603231 |
| C    | -6.82556 | -0.0867  | -0.05638 | H    | -10.7845 | 6.106298 | 0.970634 |
| N    | -7.33186 | 1.143902 | 0.152169 | H    | -8.31754 | 5.808888 | 0.959477 |
| C    | -8.65617 | 1.241308 | 0.154533 | H    | -7.34333 | 3.553113 | 0.5806   |
| N    | -9.50018 | 0.218799 | -0.02975 | H    | 12.00749 | -1.56411 | 4.290615 |
| C    | -8.91209 | -0.9673  | -0.22785 | H    | 10.54711 | -2.14297 | 5.106518 |
| N    | -7.6003  | -1.17137 | -0.2516  | H    | 11.32975 | -3.14699 | 3.881639 |
| C    | -9.79719 | -2.14601 | -0.43853 | H    | 10.49566 | 1.939144 | -5.29182 |
| C    | -9.24783 | 2.588778 | 0.380438 | H    | 8.921936 | 2.707218 | -5.55186 |

|   |          |          |          |  |   |         |          |          |
|---|----------|----------|----------|--|---|---------|----------|----------|
| C | -11.1875 | -1.9986  | -0.42599 |  | H | 10.1832 | 3.558749 | -4.65339 |
| C | -12.0121 | -3.10201 | -0.62348 |  |   |         |          |          |

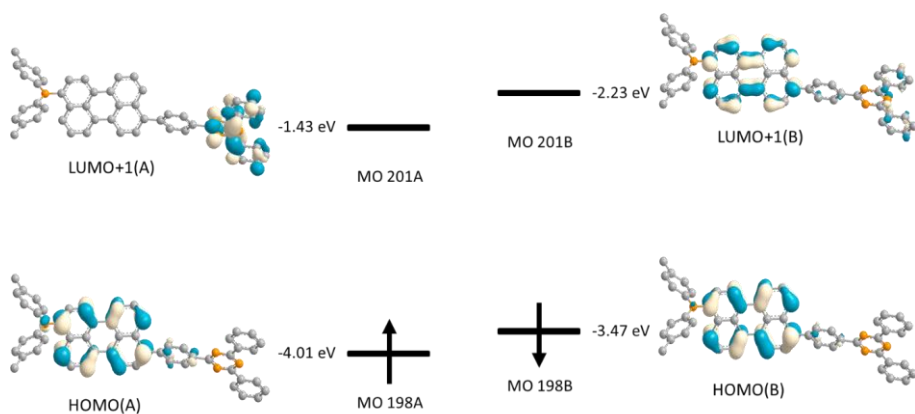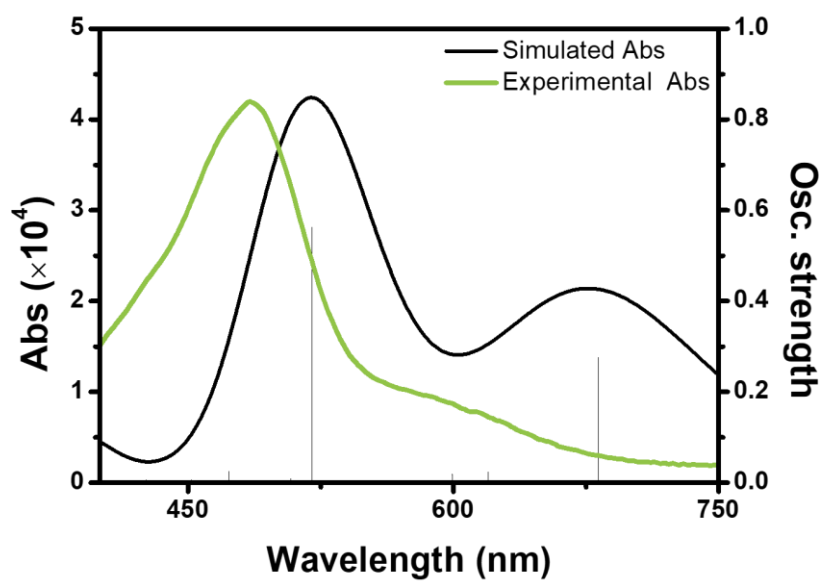

Figure S28. (Up): Energy levels and isodensity plots (isodensity contour = 0.035 a.u.) of  $3c^-$  (Down): Electronic transition of the simulated/SEC experimental absorption spectra of  $3c^-$

Table S18. TD-DFT calculation: Transition assignment of  $3e^-$ 

| Excited State | 3: 2.177-?Sym | 1.8179 eV | 682.01 nm | f=0.2755     | <S**2>=0.935 |
|---------------|---------------|-----------|-----------|--------------|--------------|
| 178A -> 265A  | 0.01290       |           |           | 199A -> 259A | 0.01172      |
| 178A -> 272A  | -0.01008      |           |           | 199A -> 262A | 0.01110      |
| 179A -> 269A  | -0.01013      |           |           | 199A -> 263A | -0.01082     |
| 179A -> 281A  | -0.01053      |           |           | 199A -> 281A | -0.01254     |
| 187A -> 201A  | 0.01407       |           |           | 199A -> 294A | -0.01146     |
| 189A -> 212A  | -0.01308      |           |           | 199A -> 300A | -0.01231     |
| 189A -> 213A  | 0.01558       |           |           | 178B -> 267B | 0.01137      |
| 190A -> 217A  | 0.01152       |           |           | 178B -> 273B | -0.01320     |
| 192A -> 212A  | -0.01121      |           |           | 180B -> 201B | -0.01005     |
| 192A -> 213A  | 0.01405       |           |           | 180B -> 288B | -0.01002     |
| 193A -> 213A  | -0.01169      |           |           | 190B -> 231B | -0.01202     |
| 193A -> 216A  | -0.01003      |           |           | 191B -> 217B | -0.01587     |
| 193A -> 233A  | -0.02176      |           |           | 192B -> 201B | -0.02453     |
| 194A -> 200A  | -0.01812      |           |           | 192B -> 215B | -0.01065     |
| 194A -> 202A  | 0.01584       |           |           | 192B -> 216B | 0.01557      |
| 194A -> 212A  | 0.01565       |           |           | 192B -> 222B | -0.02710     |
| 194A -> 213A  | -0.02536      |           |           | 192B -> 228B | -0.02383     |
| 194A -> 216A  | -0.02678      |           |           | 192B -> 231B | 0.01689      |
| 194A -> 217A  | -0.02474      |           |           | 192B -> 237B | -0.01103     |
| 194A -> 219A  | -0.01804      |           |           | 192B -> 240B | -0.01173     |
| 194A -> 221A  | 0.01746       |           |           | 192B -> 246B | 0.01172      |
| 194A -> 223A  | -0.04001      |           |           | 192B -> 247B | 0.01142      |
| 194A -> 226A  | 0.01190       |           |           | 192B -> 248B | -0.01688     |
| 194A -> 227A  | 0.01973       |           |           | 193B -> 218B | 0.01212      |
| 194A -> 233A  | 0.01168       |           |           | 193B -> 232B | 0.01377      |
| 195A -> 202A  | -0.01513      |           |           | 193B -> 233B | 0.05021      |
| 195A -> 212A  | -0.01781      |           |           | 193B -> 234B | 0.01493      |
| 195A -> 213A  | 0.02149       |           |           | 193B -> 237B | 0.01323      |
| 195A -> 217A  | -0.01119      |           |           | 193B -> 238B | -0.01495     |
| 195A -> 218A  | 0.01206       |           |           | 194B -> 216B | -0.02194     |
| 195A -> 223A  | -0.01772      |           |           | 194B -> 217B | 0.01343      |
| 196A -> 202A  | -0.02365      |           |           | 194B -> 218B | 0.02101      |
| 196A -> 212A  | -0.02206      |           |           | 194B -> 229B | 0.02271      |
| 196A -> 213A  | 0.02925       |           |           | 194B -> 230B | 0.02359      |
| 196A -> 221A  | 0.01080       |           |           | 194B -> 231B | 0.07519      |
| 196A -> 223A  | 0.02763       |           |           | 194B -> 232B | 0.05071      |
| 196A -> 227A  | -0.01812      |           |           | 194B -> 233B | -0.02523     |
| 197A -> 200A  | 0.02534       |           |           | 194B -> 234B | -0.01278     |
| 197A -> 213A  | -0.01234      |           |           | 194B -> 235B | -0.01956     |
| 197A -> 223A  | -0.01115      |           |           | 194B -> 237B | -0.01356     |
| 198A -> 200A  | 0.15786       |           |           | 194B -> 240B | -0.01431     |
| 198A -> 202A  | -0.05769      |           |           | 195B -> 206B | -0.01158     |
| 198A -> 203A  | -0.01723      |           |           | 195B -> 215B | -0.01014     |
| 198A -> 206A  | 0.01006       |           |           | 195B -> 216B | -0.02314     |
| 198A -> 212A  | -0.01404      |           |           | 195B -> 218B | 0.05440      |
| 198A -> 213A  | 0.01567       |           |           | 195B -> 219B | -0.02988     |
| 198A -> 217A  | -0.01317      |           |           | 195B -> 231B | -0.01133     |
| 198A -> 218A  | 0.01003       |           |           | 195B -> 232B | -0.01133     |
| 198A -> 256A  | -0.01002      |           |           | 195B -> 233B | -0.01501     |
| 198A -> 259A  | -0.01262      |           |           | 196B -> 200B | 0.02356      |
| 198A -> 260A  | 0.01388       |           |           | 196B -> 201B | 0.06368      |

|              |          |              |          |
|--------------|----------|--------------|----------|
| 198A -> 263A | 0.01859  | 196B -> 202B | 0.05515  |
| 198A -> 265A | -0.01481 | 196B -> 203B | -0.01103 |
| 198A -> 272A | 0.01115  | 196B -> 204B | 0.04199  |
| 199A -> 200A | -0.08958 | 196B -> 216B | 0.01745  |
| 199A -> 202A | -0.11925 | 196B -> 217B | 0.01016  |
| 199A -> 203A | -0.04313 | 196B -> 219B | 0.01389  |
| 199A -> 204A | -0.02272 | 196B -> 222B | -0.04033 |
| 199A -> 209A | -0.02213 | 196B -> 226B | 0.01627  |
| 199A -> 210A | -0.01550 | 196B -> 228B | -0.04736 |
| 199A -> 211A | 0.01045  | 196B -> 231B | 0.03462  |
| 199A -> 212A | -0.11279 | 196B -> 235B | -0.01925 |
| 199A -> 213A | 0.11226  | 196B -> 237B | -0.01311 |
| 199A -> 214A | -0.01341 | 196B -> 240B | -0.01566 |
| 199A -> 215A | -0.02243 | 196B -> 248B | -0.01756 |
| 199A -> 216A | -0.04350 | 196B -> 250B | 0.01114  |
| 199A -> 217A | -0.17477 | 197B -> 200B | -0.03558 |
| 199A -> 218A | 0.05858  | 197B -> 201B | 0.02713  |
| 199A -> 219A | -0.08304 | 197B -> 202B | -0.01339 |
| 199A -> 220A | -0.02138 | 197B -> 204B | -0.01403 |
| 199A -> 221A | 0.11765  | 197B -> 215B | 0.01364  |
| 199A -> 222A | -0.01873 | 197B -> 216B | -0.02371 |
| 199A -> 223A | -0.14196 | 197B -> 222B | 0.03332  |
| 199A -> 225A | -0.01683 | 197B -> 228B | 0.02616  |
| 199A -> 226A | 0.05734  | 197B -> 231B | -0.01349 |
| 199A -> 227A | 0.02154  | 197B -> 248B | 0.01016  |
| 199A -> 228A | 0.02469  | 198B -> 199B | -0.07344 |
| 199A -> 230A | 0.01640  | 198B -> 200B | -0.40366 |
| 199A -> 232A | 0.01799  | 198B -> 201B | 0.74918  |
| 199A -> 233A | 0.02318  | 198B -> 202B | 0.15496  |
| 199A -> 236A | 0.03641  | 198B -> 203B | -0.02294 |
| 199A -> 237A | 0.01977  | 198B -> 204B | 0.07973  |
| 199A -> 238A | -0.01226 | 198B -> 206B | -0.05443 |
| 199A -> 239A | -0.03500 | 198B -> 215B | 0.03345  |
| 199A -> 240A | 0.02475  | 198B -> 216B | -0.02510 |
| 199A -> 242A | 0.01442  | 198B -> 222B | 0.03226  |
| 199A -> 243A | 0.01016  | 198B -> 232B | -0.01266 |
| 199A -> 244A | -0.02231 | 198B -> 235B | -0.01551 |
| 199A -> 246A | -0.01089 | 198B -> 246B | -0.01022 |
| 199A -> 247A | -0.01671 | 198B -> 255B | -0.01033 |
| 199A -> 248A | 0.02282  | 198B -> 256B | 0.01025  |
| 199A -> 250A | -0.01457 | 198B -> 260B | -0.01289 |
| 199A -> 252A | -0.01021 | 198B -> 264B | -0.01350 |
| 199A -> 253A | 0.01013  | 198B -> 279B | 0.01267  |
| 199A -> 254A | 0.01627  | 198B -> 284B | 0.01212  |



Table S19. Cartesian coordinates for optimized structure for **3d<sup>+</sup>**

Symbolic Z-matrix:

Charge = -1 Multiplicity = 2

| Atom | X        | Y        | Z        | Atom | X        | Y        | Z        |
|------|----------|----------|----------|------|----------|----------|----------|
| C    | 4.169027 | 0.396438 | 2.042733 | C    | -10.4254 | -3.69563 | -2.76947 |
| C    | 5.527499 | 0.464763 | 1.753079 | C    | -9.60575 | -2.79098 | -2.10209 |
| C    | 6.00268  | 0.156876 | 0.491357 | C    | -11.0299 | 2.255316 | 1.588895 |
| C    | 5.103867 | -0.23323 | -0.53875 | C    | -11.587  | 3.285541 | 2.340365 |
| C    | 5.565828 | -0.58787 | -1.82761 | C    | -10.7624 | 4.186514 | 3.012709 |
| C    | 4.659928 | -0.96409 | -2.80376 | C    | -9.37703 | 4.051955 | 2.92959  |
| C    | 3.292567 | -0.98765 | -2.54754 | C    | -8.81832 | 3.022639 | 2.178568 |
| C    | 2.774042 | -0.64057 | -1.28462 | O    | 10.67891 | -3.60906 | 2.660149 |
| C    | 1.354159 | -0.63689 | -1.00841 | O    | 9.412312 | 4.290523 | -3.04779 |
| C    | 0.399373 | -0.92421 | -2.00882 | C    | 10.25851 | -4.94708 | 2.772632 |
| C    | -0.95541 | -0.89657 | -1.74973 | C    | 8.695144 | 5.487015 | -3.22671 |
| C    | -1.47201 | -0.5819  | -0.48498 | H    | 3.84873  | 0.658351 | 3.044267 |
| C    | -0.5367  | -0.35914 | 0.588358 | H    | 6.236481 | 0.762429 | 2.522683 |
| C    | -0.95522 | -0.21928 | 1.92811  | H    | 6.629865 | -0.56374 | -2.039   |
| C    | -0.03976 | 0.006479 | 2.944479 | H    | 5.020512 | -1.24443 | -3.79139 |
| C    | 1.316466 | 0.106796 | 2.668006 | H    | 2.626598 | -1.29087 | -3.34706 |
| C    | 1.803979 | -0.06394 | 1.362332 | H    | 0.717183 | -1.13061 | -3.02443 |
| C    | 0.879305 | -0.34588 | 0.308157 | H    | -1.64579 | -1.05802 | -2.57483 |
| C    | 3.229264 | 0.025977 | 1.06591  | H    | -2.00572 | -0.32426 | 2.175631 |
| C    | 3.695969 | -0.27626 | -0.24882 | H    | -0.38794 | 0.098158 | 3.971064 |
| N    | 7.408864 | 0.223442 | 0.23211  | H    | 1.999656 | 0.285759 | 3.490441 |
| C    | -2.92151 | -0.46221 | -0.33381 | H    | 9.836395 | 0.597019 | 1.338857 |
| C    | 7.916951 | 1.264043 | -0.56361 | H    | 11.24198 | -1.14945 | 2.393904 |
| C    | 8.238338 | -0.75411 | 0.817898 | H    | 8.201524 | -4.07105 | 1.566775 |
| C    | 9.486588 | -0.43061 | 1.37247  | H    | 6.835422 | -2.3444  | 0.492411 |
| C    | 10.27665 | -1.4036  | 1.965848 | H    | 9.669313 | 0.193926 | -1.2381  |
| C    | 9.83161  | -2.72526 | 2.046203 | H    | 10.50433 | 2.030233 | -2.65866 |
| C    | 8.584631 | -3.05746 | 1.518676 | H    | 7.07517  | 4.390858 | -1.60487 |
| C    | 7.804511 | -2.07827 | 0.903895 | H    | 6.267682 | 2.583638 | -0.17397 |
| C    | 9.110424 | 1.122954 | -1.29352 | H    | -2.89872 | 1.321341 | 0.88505  |
| C    | 9.581795 | 2.148737 | -2.09768 | H    | -5.33896 | 1.53893  | 1.030693 |
| C    | 8.866877 | 3.341881 | -2.2216  | H    | -5.80777 | -1.9587  | -1.41003 |
| C    | 7.670125 | 3.487386 | -1.52459 | H    | -3.36616 | -2.19571 | -1.54311 |
| C    | 7.20776  | 2.459804 | -0.70184 | H    | -11.9844 | -0.84545 | -0.66634 |
| C    | -3.5296  | 0.581908 | 0.401388 | H    | -13.456  | -2.45877 | -1.8557  |
| C    | -4.90274 | 0.713529 | 0.477148 | H    | -12.4518 | -4.28723 | -3.20518 |
| C    | -5.75531 | -0.19842 | -0.172   | H    | -9.98023 | -4.49313 | -3.35803 |
| C    | -5.16667 | -1.23889 | -0.91109 | H    | -8.52533 | -2.86963 | -2.16047 |
| C    | -3.79225 | -1.36319 | -0.9899  | H    | -11.6616 | 1.548331 | 1.061689 |
| C    | -7.20513 | -0.06705 | -0.08352 | H    | -12.6674 | 3.385439 | 2.401518 |
| N    | -7.71766 | 0.937893 | 0.652586 | H    | -11.1978 | 4.990994 | 3.599688 |
| C    | -9.04246 | 1.014995 | 0.699245 | H    | -8.72903 | 4.750742 | 3.451392 |
| N    | -9.88145 | 0.176052 | 0.079345 | H    | -7.74207 | 2.907572 | 2.106638 |
| C    | -9.28738 | -0.79273 | -0.62805 | H    | 11.06277 | -5.47396 | 3.289399 |
| N    | -7.97462 | -0.95544 | -0.74203 | H    | 9.334193 | -5.03091 | 3.360323 |
| C    | -10.1662 | -1.7601  | -1.34148 | H    | 10.1014  | -5.40452 | 1.786207 |
| C    | -9.6413  | 2.116463 | 1.50249  | H    | 9.282125 | 6.090883 | -3.92135 |

|   |          |          |          |   |          |          |          |
|---|----------|----------|----------|---|----------|----------|----------|
| C | -11.5574 | -1.6479  | -1.25839 | H | 7.702025 | 5.300854 | -3.65797 |
| C | -12.3758 | -2.55381 | -1.92634 | H | 8.57999  | 6.033973 | -2.28054 |
| C | -11.8123 | -3.57991 | -2.68358 |   |          |          |          |

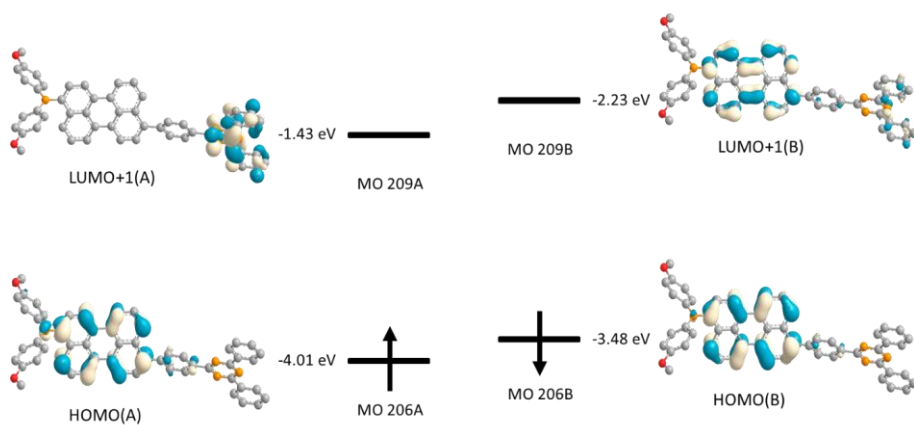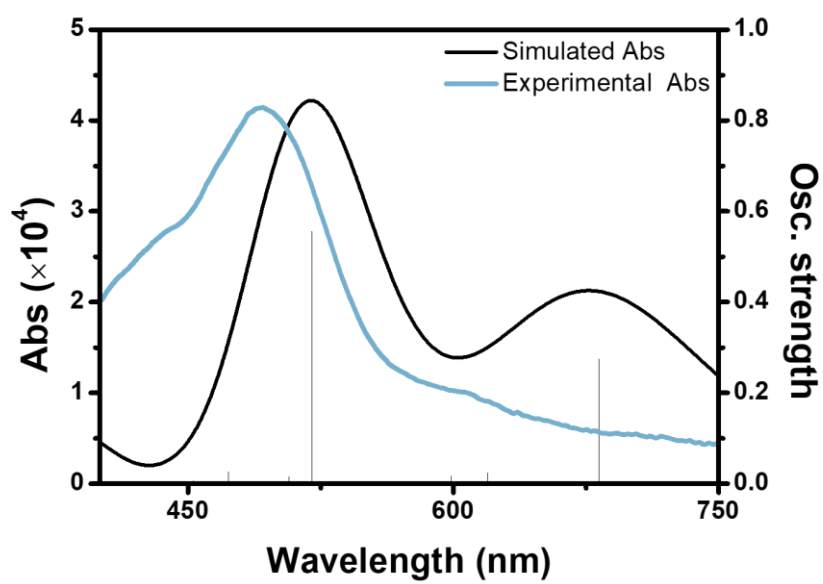

Figure S29. (Up): Energy levels and isodensity plots (isodensity contour = 0.035 a.u.) of  $3d^-$  (Down): Electronic transition of the simulated/SEC experimental absorption spectra of  $3d^-$

Table S20. TD-DFT calculation: Transition assignment of  $3d^+$ 

| Excited State | 3: 2.181-?Sym | 1.8172 eV | 682.30 nm | f=0.2746     | <S**2>=0.939 |
|---------------|---------------|-----------|-----------|--------------|--------------|
| 185A -> 271A  | -0.01019      |           |           | 199B -> 209B | 0.01976      |
| 186A -> 274A  | 0.01436       |           |           | 199B -> 230B | -0.01810     |
| 186A -> 298A  | -0.01109      |           |           | 199B -> 232B | -0.02664     |
| 195A -> 209A  | 0.01404       |           |           | 199B -> 233B | 0.01679      |
| 198A -> 222A  | 0.01728       |           |           | 199B -> 235B | 0.01833      |
| 198A -> 223A  | -0.01124      |           |           | 199B -> 236B | -0.01094     |
| 198A -> 225A  | -0.01605      |           |           | 199B -> 239B | -0.01355     |
| 198A -> 244A  | 0.01055       |           |           | 199B -> 242B | 0.01330      |
| 198A -> 248A  | 0.01018       |           |           | 199B -> 249B | 0.01655      |
| 198A -> 254A  | -0.01378      |           |           | 199B -> 255B | 0.01152      |
| 198A -> 255A  | 0.01128       |           |           | 199B -> 256B | -0.02148     |
| 200A -> 224A  | 0.01562       |           |           | 200B -> 209B | 0.01870      |
| 200A -> 225A  | -0.01214      |           |           | 201B -> 209B | -0.01052     |
| 200A -> 232A  | 0.01413       |           |           | 201B -> 239B | -0.01111     |
| 201A -> 242A  | -0.01681      |           |           | 201B -> 240B | -0.01241     |
| 201A -> 243A  | 0.01079       |           |           | 201B -> 241B | -0.02636     |
| 201A -> 244A  | -0.01028      |           |           | 201B -> 242B | 0.03894      |
| 201A -> 245A  | -0.01223      |           |           | 201B -> 243B | -0.02041     |
| 202A -> 208A  | -0.01717      |           |           | 201B -> 245B | 0.02888      |
| 202A -> 210A  | 0.01721       |           |           | 201B -> 249B | 0.01010      |
| 202A -> 219A  | -0.01482      |           |           | 202B -> 224B | 0.02046      |
| 202A -> 222A  | -0.01686      |           |           | 202B -> 226B | -0.01896     |
| 202A -> 223A  | 0.01797       |           |           | 202B -> 233B | 0.01159      |
| 202A -> 224A  | 0.03184       |           |           | 202B -> 234B | 0.01197      |
| 202A -> 225A  | -0.02497      |           |           | 202B -> 236B | -0.01809     |
| 202A -> 228A  | -0.01519      |           |           | 202B -> 237B | 0.01704      |
| 202A -> 229A  | 0.01346       |           |           | 202B -> 238B | -0.01739     |
| 202A -> 231A  | 0.01200       |           |           | 202B -> 239B | 0.05319      |
| 202A -> 232A  | 0.03642       |           |           | 202B -> 240B | 0.04524      |
| 202A -> 236A  | -0.01408      |           |           | 202B -> 241B | -0.03216     |
| 203A -> 210A  | -0.01296      |           |           | 202B -> 242B | -0.05230     |
| 203A -> 222A  | 0.01781       |           |           | 202B -> 244B | 0.02076      |
| 203A -> 223A  | -0.01237      |           |           | 202B -> 246B | 0.01234      |
| 203A -> 224A  | -0.01565      |           |           | 203B -> 215B | -0.01023     |
| 203A -> 225A  | -0.01033      |           |           | 203B -> 219B | 0.01264      |
| 203A -> 231A  | 0.01241       |           |           | 203B -> 224B | 0.01852      |
| 203A -> 232A  | 0.01608       |           |           | 203B -> 225B | 0.01793      |
| 204A -> 210A  | -0.02428      |           |           | 203B -> 226B | -0.04896     |
| 204A -> 222A  | 0.02782       |           |           | 203B -> 227B | 0.03570      |
| 204A -> 223A  | -0.02063      |           |           | 203B -> 228B | 0.01748      |
| 204A -> 224A  | -0.02249      |           |           | 203B -> 234B | -0.01106     |
| 204A -> 229A  | 0.01042       |           |           | 203B -> 241B | 0.01276      |
| 204A -> 232A  | -0.02847      |           |           | 204B -> 208B | 0.02442      |
| 205A -> 208A  | 0.03548       |           |           | 204B -> 209B | 0.06310      |
| 205A -> 232A  | 0.01113       |           |           | 204B -> 210B | 0.05555      |
| 206A -> 208A  | 0.15773       |           |           | 204B -> 211B | -0.01047     |
| 206A -> 210A  | -0.05847      |           |           | 204B -> 212B | 0.04317      |
| 206A -> 211A  | -0.01780      |           |           | 204B -> 226B | 0.01174      |
| 206A -> 222A  | 0.01832       |           |           | 204B -> 228B | -0.01409     |
| 206A -> 223A  | -0.01301      |           |           | 204B -> 229B | -0.01146     |
| 206A -> 224A  | -0.01228      |           |           | 204B -> 230B | 0.02466      |

|              |          |              |          |
|--------------|----------|--------------|----------|
| 206A -> 225A | -0.01359 | 204B -> 232B | 0.04296  |
| 206A -> 268A | -0.01264 | 204B -> 233B | -0.03130 |
| 206A -> 269A | -0.01216 | 204B -> 234B | 0.01068  |
| 206A -> 270A | -0.01101 | 204B -> 235B | -0.02861 |
| 206A -> 271A | -0.01386 | 204B -> 236B | 0.01363  |
| 206A -> 272A | 0.01281  | 204B -> 239B | 0.01761  |
| 206A -> 274A | 0.01118  | 204B -> 240B | 0.01306  |
| 207A -> 208A | 0.08784  | 204B -> 242B | -0.02860 |
| 207A -> 210A | 0.11839  | 204B -> 248B | 0.01447  |
| 207A -> 211A | 0.04292  | 204B -> 249B | -0.02156 |
| 207A -> 212A | 0.02205  | 204B -> 256B | 0.01863  |
| 207A -> 217A | -0.01056 | 204B -> 257B | 0.01010  |
| 207A -> 218A | -0.01062 | 204B -> 261B | -0.01343 |
| 207A -> 219A | -0.03505 | 204B -> 264B | 0.01102  |
| 207A -> 220A | 0.04903  | 205B -> 208B | -0.04123 |
| 207A -> 221A | -0.02261 | 205B -> 209B | 0.04331  |
| 207A -> 222A | -0.13722 | 205B -> 229B | 0.01095  |
| 207A -> 223A | 0.06941  | 205B -> 230B | -0.02000 |
| 207A -> 224A | 0.02126  | 205B -> 232B | -0.02768 |
| 207A -> 225A | 0.18596  | 205B -> 233B | 0.01928  |
| 207A -> 226A | -0.02378 | 205B -> 235B | 0.01823  |
| 207A -> 228A | 0.10177  | 205B -> 236B | -0.01290 |
| 207A -> 229A | -0.09538 | 205B -> 256B | -0.01013 |
| 207A -> 230A | 0.03560  | 206B -> 207B | -0.06920 |
| 207A -> 231A | -0.07220 | 206B -> 208B | -0.40383 |
| 207A -> 232A | -0.11305 | 206B -> 209B | 0.74908  |
| 207A -> 236A | 0.05178  | 206B -> 210B | 0.15720  |
| 207A -> 237A | 0.05754  | 206B -> 211B | -0.02231 |
| 207A -> 238A | -0.01141 | 206B -> 212B | 0.08465  |
| 207A -> 241A | -0.01088 | 206B -> 215B | -0.03393 |
| 207A -> 242A | -0.02885 | 206B -> 217B | 0.01552  |
| 207A -> 244A | -0.02302 | 206B -> 219B | 0.01643  |
| 207A -> 247A | -0.01687 | 206B -> 223B | -0.02521 |
| 207A -> 248A | -0.01054 | 206B -> 224B | 0.01374  |
| 207A -> 249A | -0.04431 | 206B -> 229B | 0.01007  |
| 207A -> 252A | -0.01149 | 206B -> 230B | -0.01738 |
| 207A -> 254A | 0.02708  | 206B -> 232B | -0.02440 |
| 207A -> 255A | -0.02883 | 206B -> 235B | 0.01419  |
| 207A -> 256A | 0.01663  | 206B -> 239B | -0.01174 |
| 207A -> 257A | 0.01254  | 206B -> 245B | 0.01556  |
| 207A -> 261A | -0.01891 | 206B -> 248B | 0.01564  |
| 207A -> 264A | 0.01472  | 206B -> 261B | -0.01366 |
| 207A -> 268A | -0.01615 | 206B -> 263B | -0.01121 |
| 207A -> 271A | -0.01146 | 206B -> 270B | 0.01363  |
| 207A -> 283A | 0.01218  | 206B -> 272B | -0.01358 |
| 198B -> 224B | -0.01541 | 206B -> 298B | -0.01707 |

Table S21. The number of imaginary frequencies, total energies, and dipole moments for the compound **3a<sup>++</sup>**–**3d<sup>++</sup>** as obtained in the geometry optimizations at  $\omega$ B97XD/6-31+G method

| Entry                  | Number of imaginary frequencies | Total energies (Eh)<br>(Hartrees) | Doublet state dipole moment<br>(field-independent basis, Debye) |
|------------------------|---------------------------------|-----------------------------------|-----------------------------------------------------------------|
| <b>3a<sup>++</sup></b> | 1                               | -2456.71649265                    | 15.8004                                                         |
| <b>3b<sup>++</sup></b> | 1                               | -2258.29152659                    | 20.5553                                                         |
| <b>3c<sup>++</sup></b> | 1                               | -2336.90879867                    | 20.5266                                                         |
| <b>3d<sup>++</sup></b> | 1                               | -2487.27978747                    | 19.3941                                                         |

Table S22. Cartesian coordinates for optimized structure for **3a<sup>+</sup>**

Symbolic Z-matrix:  
Charge = 1 Multiplicity = 2

| Atom | X        | Y        | Z        | Atom | X        | Y        | Z        |
|------|----------|----------|----------|------|----------|----------|----------|
| C    | 4.50031  | 1.280098 | 1.478604 | C    | -9.8118  | -1.90943 | 0.833731 |
| C    | 5.85107  | 1.140307 | 1.282819 | C    | -11.198  | -1.71858 | 0.845443 |
| C    | 6.364009 | 0.149977 | 0.420583 | C    | -12.0389 | -2.73006 | 1.295946 |
| C    | 5.442626 | -0.81482 | -0.14248 | C    | -11.504  | -3.93911 | 1.738157 |
| C    | 5.893711 | -1.97206 | -0.79473 | C    | -10.1234 | -4.13429 | 1.72855  |
| C    | 4.99505  | -2.8911  | -1.30993 | C    | -9.27985 | -3.12486 | 1.278538 |
| C    | 3.628967 | -2.67244 | -1.20454 | C    | -10.5951 | 2.739003 | -0.9262  |
| C    | 3.119412 | -1.5552  | -0.5329  | C    | -11.1363 | 3.942253 | -1.36521 |
| C    | 1.683616 | -1.33164 | -0.39666 | C    | -10.3008 | 4.955258 | -1.83359 |
| C    | 0.742264 | -2.16544 | -1.00819 | C    | -8.92038 | 4.761453 | -1.86157 |
| C    | -0.62539 | -1.93856 | -0.89388 | C    | -8.37618 | 3.559666 | -1.42263 |
| C    | -1.12185 | -0.87034 | -0.15992 | F    | 9.774641 | -1.02908 | -4.83501 |
| C    | -0.19621 | -0.02074 | 0.517538 | F    | 11.26409 | 2.081161 | 3.906475 |
| C    | -0.64592 | 1.016256 | 1.368155 | H    | 4.177142 | 2.09872  | 2.109018 |
| C    | 0.251331 | 1.843564 | 2.016901 | H    | 6.531849 | 1.846377 | 1.743962 |
| C    | 1.619314 | 1.664758 | 1.842615 | H    | 6.953655 | -2.16694 | -0.89364 |
| C    | 2.129592 | 0.634444 | 1.035751 | H    | 5.362147 | -3.78532 | -1.80274 |
| C    | 1.209353 | -0.24017 | 0.377063 | H    | 2.961417 | -3.40755 | -1.63666 |
| C    | 3.549211 | 0.440358 | 0.856445 | H    | 1.059011 | -3.0042  | -1.61632 |
| C    | 4.034962 | -0.62896 | 0.046535 | H    | -1.31865 | -2.59029 | -1.41676 |
| N    | 7.709417 | 0.134238 | 0.154056 | H    | -1.71067 | 1.150509 | 1.523545 |
| C    | -2.58633 | -0.64275 | -0.11565 | H    | -0.10973 | 2.633068 | 2.66758  |
| C    | 8.239149 | -0.16923 | -1.14032 | H    | 2.286122 | 2.342304 | 2.361357 |
| C    | 8.628961 | 0.65239  | 1.1237   | H    | 9.857191 | -1.35388 | -0.35323 |
| C    | 9.382207 | -0.96307 | -1.24806 | H    | 10.7952  | -1.86985 | -2.6118  |
| C    | 9.909255 | -1.25449 | -2.50031 | H    | 7.693568 | 0.453776 | -4.44247 |
| C    | 9.274589 | -0.74431 | -3.6249  | H    | 6.758087 | 0.992513 | -2.19021 |
| C    | 8.145758 | 0.059085 | -3.53927 | H    | 9.474382 | 2.11406  | -0.21494 |
| C    | 7.632797 | 0.355556 | -2.28234 | H    | 11.08196 | 2.983169 | 1.491338 |
| C    | 9.498308 | 1.690056 | 0.784293 | H    | 9.595457 | 0.157673 | 4.351904 |
| C    | 10.39611 | 2.176805 | 1.726547 | H    | 7.989844 | -0.7276  | 2.648135 |
| C    | 10.40106 | 1.61262  | 2.995574 | H    | -2.49148 | 1.35944  | -0.91528 |
| C    | 9.548123 | 0.577323 | 3.353119 | H    | -4.94744 | 1.689477 | -0.88841 |
| C    | 8.659402 | 0.091327 | 2.401475 | H    | -5.47901 | -2.25674 | 0.679765 |
| C    | -3.14084 | 0.568608 | -0.54865 | H    | -3.02427 | -2.60594 | 0.660715 |
| C    | -4.51668 | 0.756011 | -0.54297 | H    | -11.6056 | -0.77505 | 0.499488 |
| C    | -5.36583 | -0.26023 | -0.09672 | H    | -13.1137 | -2.57524 | 1.302072 |
| C    | -4.81689 | -1.47092 | 0.333002 | H    | -12.1621 | -4.72846 | 2.089758 |
| C    | -3.44114 | -1.66309 | 0.316458 | H    | -9.70439 | -5.07532 | 2.072487 |
| C    | -6.84052 | -0.05572 | -0.08338 | H    | -8.205   | -3.26904 | 1.26775  |
| N    | -7.30212 | 1.117426 | -0.51335 | H    | -11.2379 | 1.945612 | -0.56098 |
| C    | -8.63404 | 1.257701 | -0.48438 | H    | -12.2118 | 4.090163 | -1.34242 |
| N    | -9.47245 | 0.309936 | -0.05896 | H    | -10.7251 | 5.89445  | -2.17689 |
| C    | -8.91653 | -0.83181 | 0.353514 | H    | -8.26756 | 5.548724 | -2.22702 |
| N    | -7.59637 | -1.05941 | 0.358212 | H    | -7.30353 | 3.400455 | -1.44179 |
| C    | -9.21038 | 2.539676 | -0.95174 |      |          |          |          |

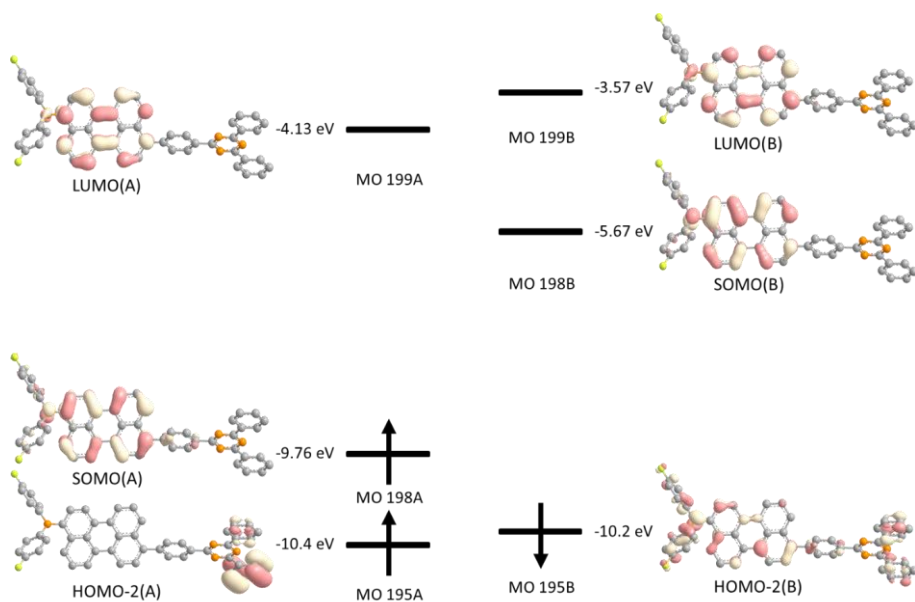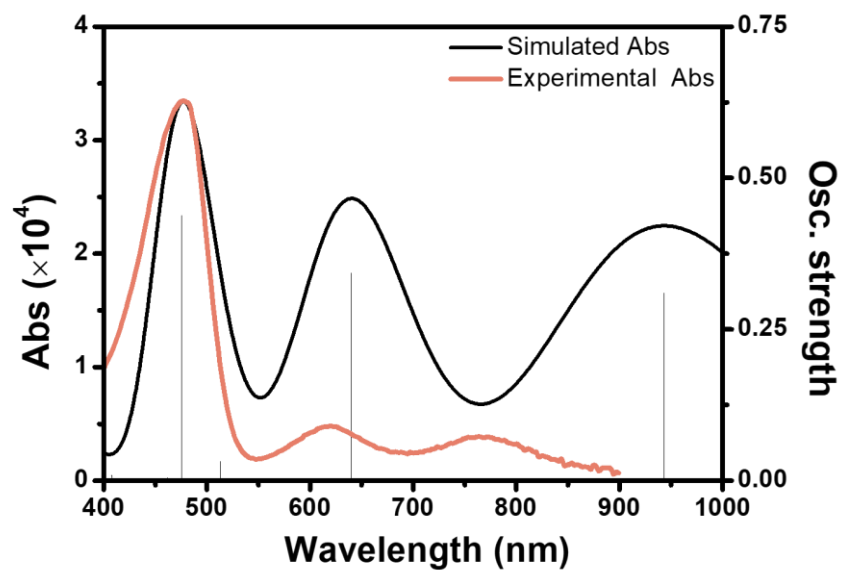

Figure S30. (Up): Energy levels and isodensity plots (isodensity contour = 0.035 a.u.) of  $3a^{++}$  (Down): Electronic transition of the simulated/SEC experimental absorption spectra of  $3a^{++}$



Table S23. TD-DFT calculation: Transition assignment of **3a<sup>+</sup>**

| Excited State 1: 2.087-?Sym |          | 1.3141 eV | 943.51 nm | f=0.3097     | <S**2>=0.839 |
|-----------------------------|----------|-----------|-----------|--------------|--------------|
| 175A -> 199A                | -0.02858 |           |           | 182B -> 200B | -0.01747     |
| 175A -> 209A                | 0.01043  |           |           | 182B -> 201B | -0.01723     |
| 182A -> 199A                | 0.02520  |           |           | 182B -> 208B | 0.02339      |
| 182A -> 200A                | 0.03313  |           |           | 183B -> 198B | -0.01103     |
| 182A -> 201A                | 0.01935  |           |           | 184B -> 198B | 0.04820      |
| 182A -> 207A                | -0.01350 |           |           | 184B -> 199B | -0.02789     |
| 183A -> 200A                | 0.02116  |           |           | 184B -> 201B | -0.01056     |
| 183A -> 202A                | -0.01388 |           |           | 184B -> 208B | 0.01219      |
| 184A -> 199A                | -0.02414 |           |           | 185B -> 198B | -0.06152     |
| 184A -> 200A                | -0.02089 |           |           | 185B -> 202B | -0.01104     |
| 184A -> 202A                | 0.01332  |           |           | 186B -> 198B | -0.01630     |
| 184A -> 207A                | 0.01994  |           |           | 186B -> 199B | 0.03163      |
| 186A -> 208A                | 0.01693  |           |           | 186B -> 200B | 0.01158      |
| 187A -> 199A                | -0.01318 |           |           | 186B -> 202B | 0.01579      |
| 188A -> 199A                | -0.01032 |           |           | 186B -> 204B | -0.01300     |
| 188A -> 206A                | 0.01142  |           |           | 186B -> 206B | -0.01666     |
| 191A -> 201A                | 0.01491  |           |           | 187B -> 198B | -0.14102     |
| 193A -> 199A                | 0.04353  |           |           | 187B -> 199B | 0.05311      |
| 193A -> 201A                | 0.01762  |           |           | 187B -> 200B | -0.01688     |
| 193A -> 204A                | -0.01509 |           |           | 187B -> 201B | 0.02735      |
| 196A -> 199A                | -0.01346 |           |           | 187B -> 202B | -0.01248     |
| 198A -> 199A                | 0.17842  |           |           | 187B -> 205B | 0.02429      |
| 198A -> 200A                | -0.02661 |           |           | 187B -> 207B | 0.01370      |
| 198A -> 201A                | 0.01010  |           |           | 187B -> 208B | -0.01250     |
| 198A -> 202A                | 0.01182  |           |           | 188B -> 198B | 0.02092      |
| 198A -> 203A                | -0.01309 |           |           | 188B -> 199B | -0.06270     |
| 198A -> 206A                | 0.01308  |           |           | 188B -> 202B | -0.01416     |
| 198A -> 207A                | 0.01926  |           |           | 188B -> 206B | -0.03031     |
| 198A -> 227A                | -0.01238 |           |           | 188B -> 208B | -0.01418     |
| 161B -> 198B                | -0.01129 |           |           | 189B -> 199B | 0.01339      |
| 164B -> 199B                | 0.01028  |           |           | 192B -> 198B | 0.16056      |
| 166B -> 198B                | -0.01341 |           |           | 192B -> 199B | 0.09991      |
| 167B -> 198B                | 0.01305  |           |           | 192B -> 202B | -0.01339     |
| 167B -> 201B                | -0.01378 |           |           | 193B -> 198B | 0.07646      |
| 167B -> 205B                | -0.01597 |           |           | 193B -> 199B | 0.01155      |
| 170B -> 202B                | 0.01257  |           |           | 194B -> 198B | -0.04114     |
| 174B -> 199B                | 0.01047  |           |           | 195B -> 198B | 0.82177      |
| 176B -> 198B                | -0.07231 |           |           | 195B -> 199B | 0.08013      |
| 176B -> 199B                | -0.06732 |           |           | 195B -> 201B | 0.01350      |
| 176B -> 208B                | 0.01398  |           |           | 195B -> 210B | -0.01051     |
| 176B -> 210B                | 0.01575  |           |           | 196B -> 198B | 0.42682      |
| 179B -> 198B                | 0.05180  |           |           | 196B -> 199B | 0.03185      |
| 179B -> 199B                | 0.03124  |           |           | 197B -> 198B | -0.02197     |
| 182B -> 198B                | -0.01273 |           |           |              |              |
| Excited State 2: 2.291-?Sym |          | 1.9371 eV | 640.05 nm | f=0.3426     | <S**2>=1.063 |
| 168A -> 199A                | 0.01694  |           |           | 167B -> 229B | -0.01452     |
| 168A -> 225A                | -0.01274 |           |           | 170B -> 198B | -0.01392     |
| 168A -> 227A                | 0.02495  |           |           | 170B -> 199B | -0.02414     |
| 168A -> 228A                | 0.02159  |           |           | 170B -> 227B | -0.01808     |
| 168A -> 231A                | -0.01082 |           |           | 170B -> 231B | 0.01643      |
| 175A -> 199A                | 0.02502  |           |           | 170B -> 232B | 0.01253      |

|              |          |              |          |
|--------------|----------|--------------|----------|
| 175A -> 201A | 0.01307  | 170B -> 238B | 0.01264  |
| 175A -> 209A | -0.01963 | 170B -> 239B | -0.01152 |
| 175A -> 227A | 0.01780  | 173B -> 198B | 0.01302  |
| 175A -> 228A | -0.01333 | 174B -> 198B | -0.01122 |
| 179A -> 199A | -0.01141 | 176B -> 198B | 0.02996  |
| 179A -> 204A | -0.01216 | 176B -> 199B | 0.01634  |
| 182A -> 199A | -0.02843 | 176B -> 200B | -0.01033 |
| 182A -> 200A | -0.05835 | 176B -> 201B | 0.01309  |
| 182A -> 201A | -0.01686 | 176B -> 205B | 0.01504  |
| 182A -> 202A | 0.06493  | 176B -> 210B | -0.01752 |
| 182A -> 203A | -0.03230 | 179B -> 199B | -0.01670 |
| 182A -> 204A | 0.02898  | 182B -> 198B | -0.04780 |
| 182A -> 205A | -0.01420 | 182B -> 201B | 0.01945  |
| 182A -> 206A | 0.02273  | 182B -> 202B | -0.02223 |
| 182A -> 207A | 0.01129  | 182B -> 208B | -0.02237 |
| 182A -> 208A | -0.01815 | 183B -> 200B | 0.01241  |
| 183A -> 199A | -0.01062 | 183B -> 208B | -0.01180 |
| 183A -> 200A | 0.02067  | 184B -> 198B | -0.01874 |
| 183A -> 201A | -0.05128 | 184B -> 200B | -0.01881 |
| 183A -> 202A | -0.03586 | 184B -> 201B | 0.02318  |
| 183A -> 204A | 0.01471  | 184B -> 202B | -0.02741 |
| 183A -> 207A | 0.02585  | 184B -> 203B | -0.01099 |
| 183A -> 209A | 0.02086  | 184B -> 205B | 0.01220  |
| 184A -> 200A | 0.04324  | 185B -> 198B | 0.08557  |
| 184A -> 202A | 0.01308  | 185B -> 199B | 0.01177  |
| 184A -> 204A | 0.02794  | 185B -> 200B | 0.03394  |
| 184A -> 206A | -0.01309 | 185B -> 202B | 0.03745  |
| 184A -> 207A | -0.03978 | 185B -> 203B | 0.01032  |
| 185A -> 199A | -0.01258 | 185B -> 204B | -0.01583 |
| 185A -> 200A | 0.01127  | 185B -> 206B | 0.01132  |
| 185A -> 201A | -0.02563 | 185B -> 208B | 0.01823  |
| 185A -> 202A | 0.05507  | 186B -> 198B | -0.12238 |
| 185A -> 203A | -0.03331 | 186B -> 201B | 0.02099  |
| 185A -> 204A | 0.06320  | 186B -> 202B | -0.03658 |
| 185A -> 207A | -0.01501 | 186B -> 203B | -0.01574 |
| 185A -> 209A | 0.01769  | 186B -> 205B | -0.02307 |
| 186A -> 200A | 0.02975  | 186B -> 207B | -0.02097 |
| 186A -> 201A | -0.02535 | 186B -> 208B | 0.01415  |
| 186A -> 203A | -0.01856 | 187B -> 198B | -0.04882 |
| 186A -> 204A | 0.02159  | 187B -> 199B | 0.02394  |
| 186A -> 209A | 0.01185  | 187B -> 200B | 0.01312  |
| 187A -> 200A | -0.05031 | 187B -> 201B | -0.04519 |
| 187A -> 201A | -0.01558 | 187B -> 202B | 0.02936  |
| 187A -> 203A | 0.03773  | 187B -> 203B | 0.01758  |
| 187A -> 204A | 0.01674  | 187B -> 204B | 0.01830  |
| 187A -> 205A | 0.02735  | 187B -> 205B | -0.03305 |
| 187A -> 206A | -0.02042 | 187B -> 206B | -0.01099 |
| 187A -> 207A | -0.02459 | 187B -> 207B | 0.01386  |
| 188A -> 199A | -0.01236 | 187B -> 210B | 0.01469  |
| 188A -> 200A | 0.01565  | 187B -> 214B | 0.01025  |
| 188A -> 201A | 0.01022  | 188B -> 198B | 0.20421  |
| 188A -> 202A | -0.01892 | 188B -> 199B | 0.01079  |
| 188A -> 203A | 0.01133  | 188B -> 200B | 0.01022  |
| 188A -> 204A | -0.01564 | 188B -> 201B | -0.01725 |

|              |          |              |          |
|--------------|----------|--------------|----------|
| 189A -> 199A | -0.03199 | 188B -> 202B | 0.04425  |
| 189A -> 202A | 0.01010  | 188B -> 203B | 0.01662  |
| 190A -> 199A | -0.05347 | 188B -> 205B | 0.02588  |
| 191A -> 199A | -0.19168 | 188B -> 206B | 0.03971  |
| 191A -> 202A | 0.01698  | 188B -> 207B | 0.01589  |
| 191A -> 203A | 0.01110  | 189B -> 198B | -0.03838 |
| 191A -> 204A | -0.03688 | 189B -> 211B | -0.01320 |
| 191A -> 209A | 0.01389  | 192B -> 198B | -0.05855 |
| 191A -> 212A | -0.01234 | 192B -> 199B | -0.07078 |
| 193A -> 199A | -0.08532 | 193B -> 198B | -0.01080 |
| 193A -> 200A | -0.04657 | 193B -> 199B | -0.01778 |
| 193A -> 201A | 0.07331  | 195B -> 198B | -0.10494 |
| 193A -> 202A | -0.01393 | 195B -> 199B | -0.16362 |
| 193A -> 203A | 0.02395  | 195B -> 201B | 0.01765  |
| 193A -> 204A | -0.05910 | 195B -> 202B | -0.03271 |
| 196A -> 199A | -0.04187 | 195B -> 203B | -0.01366 |
| 198A -> 199A | 0.86238  | 195B -> 205B | 0.01673  |
| 198A -> 200A | 0.01108  | 195B -> 210B | -0.01141 |
| 198A -> 204A | 0.04098  | 196B -> 198B | -0.05262 |
| 157B -> 265B | -0.01105 | 196B -> 199B | -0.07882 |
| 161B -> 265B | -0.01056 | 196B -> 201B | 0.01139  |
| 167B -> 198B | 0.01046  | 196B -> 202B | -0.01626 |
| 167B -> 228B | -0.01257 |              |          |

Table S24. Cartesian coordinates for optimized structure for **3b<sup>++</sup>**

Symbolic Z-matrix:  
Charge = 1 Multiplicity = 2

| Atom | X        | Y        | Z        | Atom | X        | Y        | Z        |
|------|----------|----------|----------|------|----------|----------|----------|
| C    | 4.93614  | 1.139538 | 1.606968 | C    | -9.35451 | -2.03413 | 0.56244  |
| C    | 6.287175 | 1.033585 | 1.396885 | C    | -10.1707 | 2.802248 | -0.55623 |
| C    | 6.806635 | 0.160257 | 0.417969 | C    | -10.7211 | 4.049916 | -0.82775 |
| C    | 5.890634 | -0.73608 | -0.25761 | C    | -9.89401 | 5.121643 | -1.16082 |
| C    | 6.349265 | -1.80463 | -1.04173 | C    | -8.51266 | 4.941958 | -1.22147 |
| C    | 5.456061 | -2.66099 | -1.66354 | C    | -7.95917 | 3.695737 | -0.94972 |
| C    | 4.088635 | -2.46336 | -1.53597 | C    | -10.742  | -1.85633 | 0.601008 |
| C    | 3.572331 | -1.4366  | -0.73769 | C    | -11.5749 | -2.9245  | 0.914847 |
| C    | 2.134558 | -1.23668 | -0.58015 | C    | -11.0307 | -4.17764 | 1.19262  |
| C    | 1.199102 | -1.9894  | -1.29528 | C    | -9.64894 | -4.36001 | 1.155587 |
| C    | -0.17043 | -1.78423 | -1.15715 | C    | -8.81334 | -3.29391 | 0.841981 |
| C    | -0.6731  | -0.82097 | -0.29467 | H    | 4.607676 | 1.872636 | 2.332692 |
| C    | 0.246954 | -0.05875 | 0.486285 | H    | 6.964008 | 1.68214  | 1.940792 |
| C    | -0.20923 | 0.862084 | 1.458998 | H    | 7.410367 | -1.98044 | -1.16179 |
| C    | 0.682795 | 1.605951 | 2.207189 | H    | 5.828878 | -3.48852 | -2.25803 |
| C    | 2.05245  | 1.457571 | 2.014013 | H    | 3.425482 | -3.14589 | -2.05288 |
| C    | 2.568871 | 0.538886 | 1.086237 | H    | 1.521504 | -2.74272 | -2.00406 |
| C    | 1.653696 | -0.25216 | 0.322492 | H    | -0.85953 | -2.36759 | -1.76022 |
| C    | 3.989834 | 0.376893 | 0.885361 | H    | -1.27488 | 0.970871 | 1.627612 |
| C    | 4.48207  | -0.58258 | -0.049   | H    | 0.317055 | 2.306391 | 2.950674 |
| N    | 8.148749 | 0.190253 | 0.14906  | H    | 2.714943 | 2.069045 | 2.614008 |
| C    | -2.13936 | -0.60947 | -0.22236 | H    | 9.903266 | 2.201255 | -0.00258 |
| C    | 8.680992 | 0.038255 | -1.1723  | H    | 11.49741 | 2.884184 | 1.772323 |
| C    | 9.067873 | 0.601013 | 1.171398 | H    | 11.55585 | 1.659396 | 3.930494 |
| C    | 9.931556 | 1.672373 | 0.945464 | H    | 10.02132 | -0.25545 | 4.310278 |
| C    | 10.8252  | 2.049177 | 1.942925 | H    | 8.431248 | -0.94245 | 2.529697 |
| C    | 10.85561 | 1.362251 | 3.156221 | H    | 10.30911 | -1.2079  | -0.51567 |
| C    | 9.992123 | 0.289401 | 3.371863 | H    | 11.24961 | -1.45956 | -2.79769 |
| C    | 9.098751 | -0.09866 | 2.378088 | H    | 10.14486 | -0.35367 | -4.72753 |
| C    | 9.832055 | -0.72601 | -1.36406 | H    | 8.116596 | 1.031972 | -4.36265 |
| C    | 10.35535 | -0.8633  | -2.64572 | H    | 7.185931 | 1.295521 | -2.08045 |
| C    | 9.734149 | -0.24299 | -3.72899 | H    | -2.05828 | 1.476184 | -0.76976 |
| C    | 8.592694 | 0.531192 | -3.52538 | H    | -4.5157  | 1.786148 | -0.69683 |
| C    | 8.067223 | 0.68254  | -2.24643 | H    | -5.02047 | -2.32688 | 0.373269 |
| C    | -2.70222 | 0.642279 | -0.50249 | H    | -2.56367 | -2.65541 | 0.307986 |
| C    | -4.07911 | 0.819524 | -0.47044 | H    | -10.8063 | 1.962759 | -0.29679 |
| C    | -4.92128 | -0.24902 | -0.15095 | H    | -11.7972 | 4.186717 | -0.77986 |
| C    | -4.36408 | -1.50011 | 0.124848 | H    | -10.3254 | 6.095632 | -1.37325 |
| C    | -2.98715 | -1.68011 | 0.082818 | H    | -7.86638 | 5.775096 | -1.48174 |
| C    | -6.39683 | -0.05674 | -0.10773 | H    | -6.88575 | 3.547345 | -0.99515 |
| N    | -6.867   | 1.160301 | -0.37711 | H    | -11.1569 | -0.87834 | 0.383321 |
| C    | -8.1994  | 1.287386 | -0.32537 | H    | -12.6507 | -2.77949 | 0.942682 |
| N    | -9.03121 | 0.286627 | -0.02731 | H    | -11.6827 | -5.01119 | 1.437557 |
| C    | -8.46718 | -0.89639 | 0.227823 | H    | -9.22258 | -5.33523 | 1.371464 |
| N    | -7.14596 | -1.11457 | 0.198778 | H    | -7.7375  | -3.42752 | 0.810929 |
| C    | -8.78499 | 2.616848 | -0.61513 |      |          |          |          |

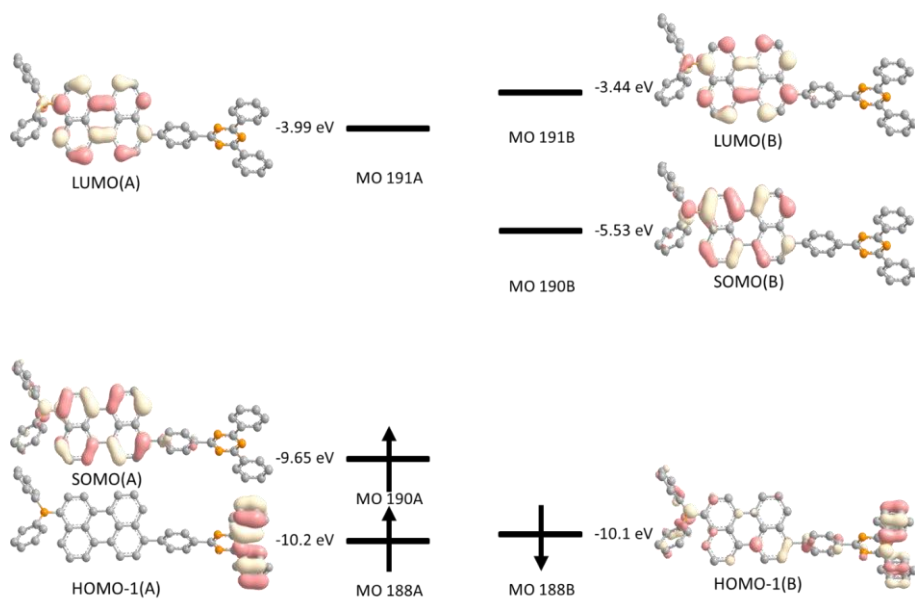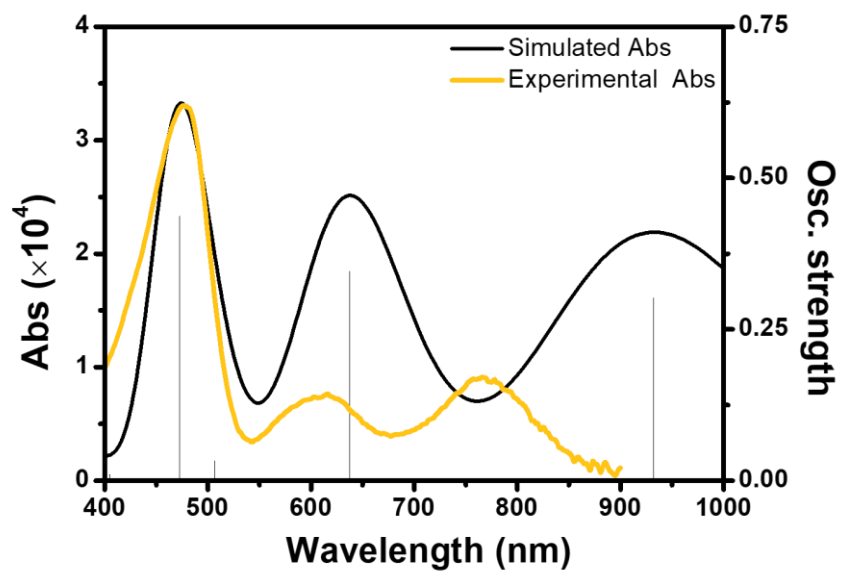

Figure S31. (Up): Energy levels and isodensity plots (isodensity contour = 0.035 a.u.) of  $3b^{+}$  (Down): Electronic transition of the simulated/SEC experimental absorption spectra of  $3b^{+}$

Table S25. TD-DFT calculation: Transition assignment of **3b<sup>+</sup>**

| Excited State | 1: | 2.088- $\pi$ Sym | 1.3299 eV | 932.32 nm    | f=0.3019 | <S**2>=0.840 |
|---------------|----|------------------|-----------|--------------|----------|--------------|
| 167A -> 191A  |    | -0.02863         |           | 172B -> 191B |          | 0.02926      |
| 167A -> 201A  |    | 0.01095          |           | 174B -> 190B |          | 0.01503      |
| 174A -> 191A  |    | 0.02806          |           | 174B -> 193B |          | 0.02631      |
| 174A -> 192A  |    | 0.01327          |           | 174B -> 195B |          | -0.01028     |
| 174A -> 193A  |    | 0.03593          |           | 174B -> 199B |          | -0.02474     |
| 174A -> 197A  |    | 0.01224          |           | 175B -> 196B |          | -0.02028     |
| 174A -> 199A  |    | -0.01366         |           | 175B -> 197B |          | -0.01221     |
| 175A -> 192A  |    | 0.02170          |           | 175B -> 198B |          | 0.01592      |
| 175A -> 193A  |    | 0.01751          |           | 176B -> 190B |          | 0.08940      |
| 175A -> 194A  |    | -0.01408         |           | 176B -> 191B |          | -0.03601     |
| 176A -> 191A  |    | -0.01731         |           | 176B -> 192B |          | 0.02305      |
| 176A -> 193A  |    | -0.01617         |           | 176B -> 195B |          | 0.01785      |
| 178A -> 191A  |    | 0.01111          |           | 176B -> 197B |          | -0.01402     |
| 178A -> 196A  |    | 0.01099          |           | 176B -> 198B |          | -0.01241     |
| 179A -> 191A  |    | -0.01316         |           | 177B -> 190B |          | -0.03601     |
| 179A -> 193A  |    | -0.01145         |           | 177B -> 191B |          | 0.04668      |
| 179A -> 199A  |    | 0.01809          |           | 177B -> 193B |          | 0.01271      |
| 180A -> 200A  |    | 0.01976          |           | 177B -> 196B |          | -0.01809     |
| 183A -> 193A  |    | 0.01376          |           | 178B -> 190B |          | 0.02747      |
| 183A -> 196A  |    | -0.01292         |           | 178B -> 191B |          | -0.04812     |
| 185A -> 191A  |    | -0.04832         |           | 178B -> 192B |          | 0.01559      |
| 185A -> 192A  |    | 0.01922          |           | 178B -> 197B |          | -0.01486     |
| 185A -> 194A  |    | -0.01194         |           | 179B -> 190B |          | 0.01223      |
| 185A -> 196A  |    | 0.01657          |           | 179B -> 191B |          | -0.06365     |
| 185A -> 201A  |    | 0.01030          |           | 179B -> 195B |          | -0.01343     |
| 188A -> 191A  |    | -0.01297         |           | 179B -> 196B |          | -0.01244     |
| 190A -> 191A  |    | 0.18615          |           | 179B -> 197B |          | -0.01499     |
| 190A -> 192A  |    | -0.02618         |           | 179B -> 198B |          | 0.01518      |
| 190A -> 194A  |    | 0.01188          |           | 179B -> 199B |          | -0.01541     |
| 190A -> 196A  |    | 0.01134          |           | 180B -> 190B |          | 0.08958      |
| 190A -> 197A  |    | -0.01358         |           | 180B -> 191B |          | -0.02193     |
| 190A -> 198A  |    | -0.01848         |           | 180B -> 192B |          | 0.01885      |
| 190A -> 199A  |    | 0.01491          |           | 180B -> 195B |          | 0.01377      |
| 190A -> 220A  |    | -0.01231         |           | 180B -> 199B |          | 0.01179      |
| 152B -> 190B  |    | 0.01174          |           | 181B -> 190B |          | 0.01050      |
| 155B -> 191B  |    | 0.01102          |           | 181B -> 191B |          | 0.01441      |
| 159B -> 190B  |    | 0.02317          |           | 184B -> 190B |          | 0.17861      |
| 159B -> 192B  |    | 0.01067          |           | 184B -> 191B |          | 0.09721      |
| 159B -> 196B  |    | 0.01020          |           | 184B -> 195B |          | -0.01333     |
| 159B -> 197B  |    | -0.01435         |           | 185B -> 190B |          | 0.06130      |
| 163B -> 195B  |    | 0.01348          |           | 186B -> 190B |          | -0.03214     |
| 163B -> 197B  |    | 0.01375          |           | 187B -> 190B |          | 0.62422      |
| 166B -> 191B  |    | 0.01095          |           | 187B -> 191B |          | 0.05998      |
| 168B -> 190B  |    | -0.07128         |           | 188B -> 190B |          | 0.68402      |
| 168B -> 191B  |    | -0.06205         |           | 188B -> 191B |          | 0.05305      |
| 168B -> 199B  |    | 0.01076          |           | 188B -> 202B |          | -0.01069     |
| 168B -> 202B  |    | 0.01586          |           | 189B -> 190B |          | -0.04823     |
| 172B -> 190B  |    | 0.05230          |           |              |          |              |
| Excited State | 2: | 2.316- $\pi$ Sym | 1.9457 eV | 637.22 nm    | f=0.3463 | <S**2>=1.091 |
| 147A -> 254A  |    | 0.01015          |           | 152B -> 257B |          | -0.01139     |
| 158A -> 220A  |    | -0.01625         |           | 159B -> 222B |          | 0.01824      |

|              |          |              |          |
|--------------|----------|--------------|----------|
| 160A -> 191A | 0.01652  | 163B -> 190B | -0.01470 |
| 160A -> 219A | 0.02900  | 163B -> 191B | -0.02190 |
| 160A -> 220A | 0.01124  | 163B -> 220B | -0.01977 |
| 160A -> 225A | -0.01270 | 163B -> 226B | -0.01369 |
| 167A -> 191A | 0.02524  | 163B -> 227B | -0.01388 |
| 167A -> 192A | -0.01131 | 163B -> 229B | -0.01326 |
| 167A -> 201A | -0.01950 | 163B -> 231B | -0.01199 |
| 167A -> 220A | 0.01803  | 165B -> 190B | 0.01064  |
| 167A -> 221A | -0.01146 | 166B -> 190B | -0.01233 |
| 171A -> 191A | -0.01119 | 168B -> 190B | 0.02720  |
| 171A -> 196A | -0.01131 | 168B -> 191B | 0.01470  |
| 174A -> 191A | -0.02872 | 168B -> 192B | -0.01483 |
| 174A -> 192A | -0.04179 | 168B -> 197B | 0.01446  |
| 174A -> 193A | -0.05311 | 168B -> 202B | -0.01768 |
| 174A -> 194A | 0.06310  | 168B -> 222B | -0.01102 |
| 174A -> 196A | 0.05870  | 172B -> 191B | -0.01637 |
| 174A -> 198A | -0.03327 | 174B -> 190B | 0.05130  |
| 174A -> 199A | 0.01168  | 174B -> 193B | -0.02289 |
| 174A -> 200A | -0.01356 | 174B -> 195B | 0.02583  |
| 175A -> 191A | -0.01720 | 174B -> 199B | 0.02146  |
| 175A -> 192A | 0.04726  | 174B -> 200B | -0.01017 |
| 175A -> 193A | -0.03638 | 176B -> 190B | -0.04512 |
| 175A -> 194A | -0.03190 | 176B -> 191B | -0.01533 |
| 175A -> 195A | -0.01312 | 176B -> 192B | -0.04982 |
| 175A -> 196A | 0.02904  | 176B -> 194B | 0.01055  |
| 175A -> 199A | 0.02154  | 176B -> 195B | -0.05698 |
| 175A -> 200A | 0.01038  | 176B -> 196B | -0.01291 |
| 175A -> 201A | 0.02518  | 176B -> 198B | 0.01250  |
| 176A -> 191A | -0.01238 | 176B -> 202B | -0.01144 |
| 176A -> 192A | 0.03583  | 176B -> 206B | -0.01022 |
| 176A -> 193A | 0.01429  | 177B -> 190B | -0.10909 |
| 176A -> 194A | 0.03281  | 177B -> 195B | -0.02332 |
| 176A -> 196A | 0.07726  | 177B -> 197B | -0.03291 |
| 176A -> 197A | 0.03103  | 177B -> 198B | -0.01105 |
| 176A -> 199A | -0.02979 | 177B -> 199B | 0.01876  |
| 176A -> 201A | 0.01812  | 178B -> 190B | 0.08325  |
| 177A -> 196A | -0.01191 | 178B -> 193B | 0.03158  |
| 178A -> 192A | 0.03960  | 178B -> 196B | -0.02100 |
| 178A -> 193A | 0.04379  | 178B -> 197B | 0.01996  |
| 178A -> 196A | 0.01720  | 178B -> 198B | -0.02059 |
| 178A -> 197A | -0.04220 | 178B -> 199B | 0.01894  |
| 178A -> 198A | -0.03361 | 179B -> 190B | 0.20762  |
| 178A -> 199A | 0.01282  | 179B -> 191B | 0.01215  |
| 179A -> 191A | -0.01471 | 179B -> 192B | 0.01998  |
| 179A -> 193A | 0.02713  | 179B -> 194B | -0.01159 |
| 179A -> 194A | -0.01785 | 179B -> 195B | 0.04978  |
| 179A -> 196A | -0.03135 | 179B -> 197B | 0.05216  |
| 179A -> 199A | -0.01231 | 179B -> 199B | -0.01065 |
| 180A -> 192A | 0.01298  | 180B -> 191B | -0.01980 |
| 180A -> 194A | -0.01249 | 180B -> 192B | -0.02620 |
| 181A -> 191A | -0.03105 | 180B -> 193B | 0.01247  |
| 182A -> 191A | -0.03981 | 180B -> 195B | -0.03309 |
| 183A -> 191A | -0.18306 | 180B -> 196B | -0.01644 |
| 183A -> 193A | -0.01097 | 181B -> 190B | -0.03968 |

|              |          |
|--------------|----------|
| 183A -> 194A | 0.02678  |
| 183A -> 196A | -0.03473 |
| 183A -> 201A | 0.01448  |
| 183A -> 204A | -0.01193 |
| 185A -> 191A | 0.07069  |
| 185A -> 192A | 0.08126  |
| 185A -> 193A | -0.02907 |
| 185A -> 195A | -0.01270 |
| 185A -> 196A | 0.06437  |
| 185A -> 197A | 0.01416  |
| 185A -> 201A | 0.01045  |
| 188A -> 191A | -0.03529 |
| 190A -> 191A | 0.86380  |
| 190A -> 192A | 0.01339  |
| 190A -> 194A | -0.01683 |
| 190A -> 196A | 0.04145  |
| 190A -> 197A | 0.01197  |

|              |          |
|--------------|----------|
| 181B -> 195B | -0.01137 |
| 181B -> 203B | -0.01328 |
| 184B -> 190B | -0.05946 |
| 184B -> 191B | -0.07298 |
| 184B -> 192B | 0.01291  |
| 184B -> 197B | -0.01025 |
| 185B -> 191B | -0.01538 |
| 187B -> 190B | -0.08316 |
| 187B -> 191B | -0.13322 |
| 187B -> 195B | -0.02954 |
| 187B -> 196B | -0.01257 |
| 188B -> 190B | -0.08860 |
| 188B -> 191B | -0.13827 |
| 188B -> 192B | -0.01311 |
| 188B -> 195B | -0.03048 |
| 188B -> 196B | -0.01315 |



Table S26. Cartesian coordinates for optimized structure for **3c<sup>++</sup>**

Symbolic Z-matrix:  
Charge = 1 Multiplicity = 2

| Atom | X        | Y        | Z        | Atom | X        | Y        | Z        |
|------|----------|----------|----------|------|----------|----------|----------|
| C    | 4.489272 | 1.281403 | 1.479125 | C    | -11.5005 | -3.91604 | 1.826207 |
| C    | 5.839675 | 1.140949 | 1.288243 | C    | -10.1196 | -4.10879 | 1.813019 |
| C    | 6.355591 | 0.155355 | 0.41947  | C    | -9.28016 | -3.1056  | 1.341757 |
| C    | 5.434183 | -0.80727 | -0.15197 | C    | -10.6157 | 2.718115 | -0.95678 |
| C    | 5.886567 | -1.96208 | -0.80667 | C    | -11.1605 | 3.913063 | -1.41371 |
| C    | 4.988053 | -2.88056 | -1.32209 | C    | -10.3284 | 4.919622 | -1.90165 |
| C    | 3.621312 | -2.66327 | -1.21626 | C    | -8.94777 | 4.72763  | -1.93121 |
| C    | 3.111469 | -1.54778 | -0.54457 | C    | -8.39998 | 3.534107 | -1.47442 |
| C    | 1.673344 | -1.32418 | -0.40986 | C    | 11.40818 | 2.104212 | 4.078312 |
| C    | 0.734256 | -2.15496 | -1.02393 | C    | 9.888614 | -1.0707  | -5.00972 |
| C    | -0.63522 | -1.92786 | -0.91032 | H    | 4.164295 | 2.097371 | 2.111961 |
| C    | -1.13144 | -0.86291 | -0.17485 | H    | 6.520693 | 1.843974 | 1.753561 |
| C    | -0.20677 | -0.01276 | 0.503111 | H    | 6.946613 | -2.15456 | -0.90905 |
| C    | -0.65748 | 1.027579 | 1.350561 | H    | 5.355741 | -3.77372 | -1.8165  |
| C    | 0.238672 | 1.853564 | 1.999445 | H    | 2.954045 | -3.39845 | -1.64884 |
| C    | 1.60829  | 1.671993 | 1.82898  | H    | 1.051393 | -2.99281 | -1.63322 |
| C    | 2.118548 | 0.641194 | 1.025602 | H    | -1.32794 | -2.57953 | -1.43417 |
| C    | 1.198544 | -0.23309 | 0.364835 | H    | -1.72257 | 1.164686 | 1.501145 |
| C    | 3.539536 | 0.445338 | 0.849929 | H    | -0.12227 | 2.64543  | 2.647427 |
| C    | 4.026557 | -0.62243 | 0.036854 | H    | 2.274485 | 2.350151 | 2.347754 |
| N    | 7.698105 | 0.146245 | 0.156619 | H    | 9.512387 | 2.082859 | -0.20007 |
| C    | -2.59724 | -0.63727 | -0.12685 | H    | 11.09508 | 2.92723  | 1.499378 |
| C    | 8.234759 | -0.16396 | -1.13336 | H    | 9.509394 | 0.152817 | 4.365298 |
| C    | 8.616153 | 0.649832 | 1.135194 | H    | 7.928166 | -0.69832 | 2.665408 |
| C    | 9.51365  | 1.664474 | 0.802144 | H    | 9.851417 | -1.34191 | -0.33603 |
| C    | 10.40206 | 2.132051 | 1.761638 | H    | 10.78608 | -1.87391 | -2.56023 |
| C    | 10.41827 | 1.603921 | 3.059011 | H    | 7.683919 | 0.436495 | -4.42012 |
| C    | 9.51168  | 0.585455 | 3.368472 | H    | 6.753998 | 0.980643 | -2.19971 |
| C    | 8.618861 | 0.103078 | 2.417435 | H    | -2.50881 | 1.353396 | -0.95372 |
| C    | 9.378339 | -0.95604 | -1.23441 | H    | -4.96537 | 1.68047  | -0.9213  |
| C    | 9.898196 | -1.25116 | -2.48844 | H    | -5.48369 | -2.24389 | 0.705535 |
| C    | 9.298779 | -0.76701 | -3.65728 | H    | -3.02792 | -2.58869 | 0.680571 |
| C    | 8.160184 | 0.035585 | -3.52928 | H    | -11.6139 | -0.77352 | 0.534638 |
| C    | 7.632591 | 0.346927 | -2.28172 | H    | -13.1148 | -2.56258 | 1.375083 |
| C    | -3.15585 | 0.566523 | -0.57466 | H    | -12.1554 | -4.7005  | 2.194432 |
| C    | -4.53191 | 0.752351 | -0.56497 | H    | -9.69702 | -5.04308 | 2.17078  |
| C    | -5.37768 | -0.25862 | -0.10035 | H    | -8.20508 | -3.24781 | 1.328106 |
| C    | -4.82466 | -1.46189 | 0.34449  | H    | -11.2557 | 1.929689 | -0.57622 |
| C    | -3.44841 | -1.6517  | 0.324925 | H    | -12.2362 | 4.059512 | -1.3896  |
| C    | -6.85214 | -0.05624 | -0.08331 | H    | -10.7555 | 5.852346 | -2.2589  |
| N    | -7.31862 | 1.108915 | -0.53044 | H    | -8.29748 | 5.509835 | -2.31177 |
| C    | -8.65027 | 1.247345 | -0.49755 | H    | -7.32716 | 3.376143 | -1.49453 |
| N    | -9.48561 | 0.305846 | -0.05248 | H    | 11.51588 | 3.192031 | 4.026264 |
| C    | -8.92533 | -0.8278  | 0.376267 | H    | 11.10566 | 1.839431 | 5.095178 |
| N    | -7.6052  | -1.05342 | 0.378394 | H    | 12.39779 | 1.667382 | 3.900644 |
| C    | -9.81653 | -1.89887 | 0.879057 | H    | 10.31796 | -2.07658 | -5.04053 |
| C    | -9.23075 | 2.520669 | -0.98389 | H    | 9.136975 | -0.99559 | -5.80063 |

|   |          |          |          |  |   |          |         |          |
|---|----------|----------|----------|--|---|----------|---------|----------|
| C | -11.203  | -1.71039 | 0.894456 |  | H | 10.69152 | -0.3628 | -5.24689 |
| C | -12.0398 | -2.7156  | 1.366224 |  |   |          |         |          |

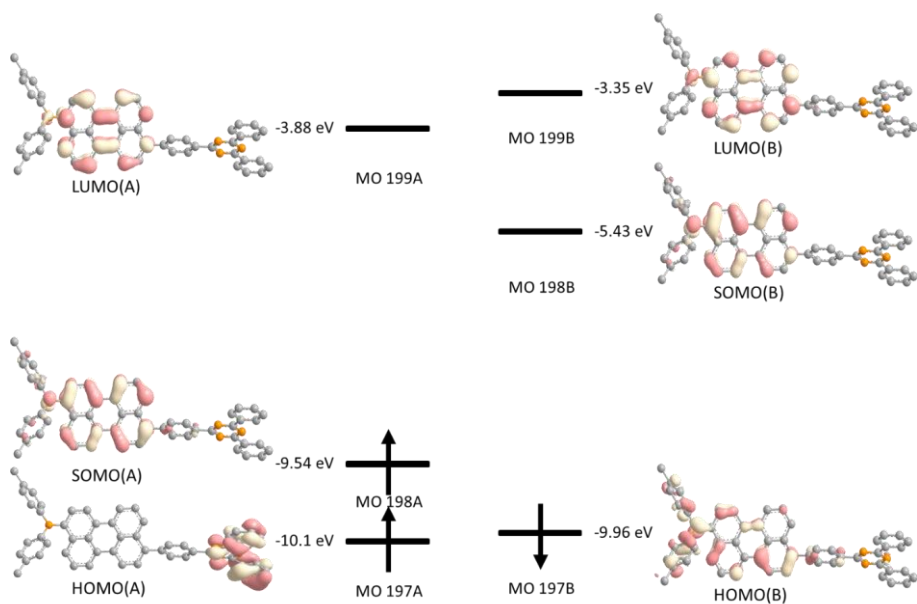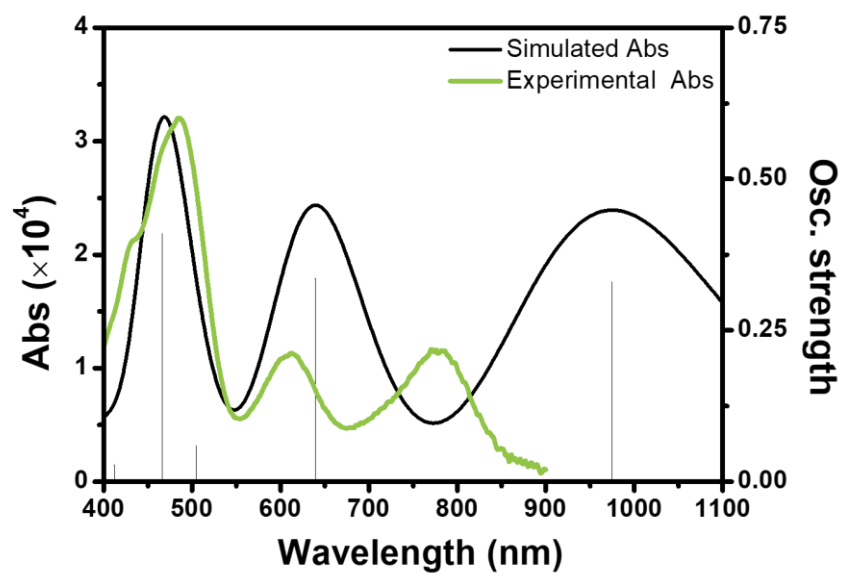

Figure S32. (Up): Energy levels and isodensity plots (isodensity contour = 0.035 a.u.) of  $3c^{++}$  (Down): Electronic transition of the simulated/SEC experimental absorption spectra of  $3c^{++}$

Table S27. TD-DFT calculation: Transition assignment of  $3e^{+}$ 

| Excited State | 1: 2.089-?Sym | 1.2716 eV | 975.06 nm | f=0.3301     | <S**2>=0.841 |
|---------------|---------------|-----------|-----------|--------------|--------------|
| 150A -> 199A  | 0.01087       |           |           | 182B -> 198B | -0.01400     |
| 175A -> 199A  | -0.02966      |           |           | 182B -> 201B | -0.02714     |
| 175A -> 209A  | 0.01054       |           |           | 182B -> 207B | -0.02548     |
| 182A -> 199A  | 0.02651       |           |           | 183B -> 198B | 0.04772      |
| 182A -> 200A  | 0.01257       |           |           | 183B -> 203B | 0.01342      |
| 182A -> 201A  | 0.04018       |           |           | 183B -> 206B | -0.01260     |
| 182A -> 205A  | -0.01166      |           |           | 184B -> 198B | 0.05859      |
| 182A -> 206A  | 0.01186       |           |           | 184B -> 199B | -0.02269     |
| 182A -> 207A  | -0.01393      |           |           | 184B -> 200B | 0.01287      |
| 183A -> 200A  | -0.01871      |           |           | 184B -> 203B | 0.01348      |
| 183A -> 201A  | -0.01748      |           |           | 184B -> 207B | -0.01040     |
| 183A -> 203A  | 0.01211       |           |           | 185B -> 198B | 0.01319      |
| 184A -> 199A  | 0.01680       |           |           | 185B -> 199B | -0.02229     |
| 184A -> 201A  | 0.01309       |           |           | 185B -> 200B | 0.01275      |
| 185A -> 207A  | -0.01868      |           |           | 185B -> 205B | -0.01459     |
| 187A -> 208A  | 0.01959       |           |           | 185B -> 207B | -0.01124     |
| 188A -> 206A  | -0.01105      |           |           | 186B -> 198B | 0.03430      |
| 192A -> 201A  | -0.01221      |           |           | 186B -> 199B | -0.07698     |
| 192A -> 204A  | 0.01089       |           |           | 186B -> 201B | -0.01162     |
| 193A -> 199A  | -0.04245      |           |           | 186B -> 203B | -0.01135     |
| 193A -> 200A  | 0.01797       |           |           | 186B -> 204B | -0.01420     |
| 193A -> 203A  | -0.01556      |           |           | 187B -> 198B | -0.10808     |
| 193A -> 204A  | 0.01808       |           |           | 187B -> 199B | 0.04157      |
| 196A -> 199A  | -0.01221      |           |           | 187B -> 200B | -0.02355     |
| 198A -> 199A  | -0.17130      |           |           | 187B -> 203B | -0.01729     |
| 198A -> 200A  | 0.02585       |           |           | 187B -> 205B | 0.01490      |
| 198A -> 201A  | 0.01035       |           |           | 187B -> 207B | 0.01428      |
| 198A -> 204A  | -0.01236      |           |           | 188B -> 199B | -0.03531     |
| 198A -> 205A  | -0.01231      |           |           | 188B -> 204B | 0.02393      |
| 198A -> 206A  | 0.01545       |           |           | 188B -> 205B | -0.01179     |
| 198A -> 207A  | -0.01268      |           |           | 188B -> 206B | 0.03150      |
| 198A -> 229A  | 0.01112       |           |           | 188B -> 207B | 0.01303      |
| 159B -> 198B  | -0.01353      |           |           | 189B -> 199B | 0.01533      |
| 163B -> 199B  | 0.01062       |           |           | 192B -> 198B | -0.12894     |
| 167B -> 198B  | 0.02101       |           |           | 192B -> 199B | -0.09124     |
| 171B -> 203B  | 0.01514       |           |           | 192B -> 203B | 0.01403      |
| 171B -> 205B  | 0.01534       |           |           | 193B -> 198B | 0.03196      |
| 174B -> 199B  | 0.01097       |           |           | 194B -> 198B | -0.01679     |
| 177B -> 198B  | -0.06443      |           |           | 195B -> 198B | 0.15406      |
| 177B -> 199B  | -0.05359      |           |           | 195B -> 199B | 0.02331      |
| 177B -> 210B  | -0.01442      |           |           | 197B -> 198B | 0.92672      |
| 180B -> 198B  | 0.07553       |           |           | 197B -> 199B | 0.08557      |
| 180B -> 199B  | 0.04695       |           |           | 197B -> 200B | -0.01093     |
| 180B -> 210B  | 0.01051       |           |           | 197B -> 210B | 0.01353      |
| Excited State | 2: 2.377-?Sym | 1.9397 eV | 639.18 nm | f=0.3358     | <S**2>=1.163 |
| 153A -> 266A  | 0.01462       |           |           | 163B -> 198B | 0.01006      |
| 163A -> 229A  | 0.01161       |           |           | 165B -> 198B | -0.01111     |
| 167A -> 199A  | 0.01469       |           |           | 165B -> 230B | 0.01045      |
| 167A -> 227A  | -0.01816      |           |           | 167B -> 230B | 0.01058      |
| 167A -> 229A  | 0.02349       |           |           | 171B -> 198B | 0.01605      |
| 167A -> 233A  | 0.01204       |           |           | 171B -> 199B | 0.02006      |

|              |          |              |          |
|--------------|----------|--------------|----------|
| 168A -> 227A | 0.01423  | 171B -> 228B | 0.01185  |
| 174A -> 204A | -0.01001 | 171B -> 229B | -0.01645 |
| 175A -> 199A | -0.02411 | 171B -> 234B | 0.01404  |
| 175A -> 200A | 0.01571  | 171B -> 235B | 0.01457  |
| 175A -> 209A | 0.02054  | 171B -> 236B | 0.01105  |
| 175A -> 228A | 0.01066  | 171B -> 240B | -0.01201 |
| 175A -> 229A | -0.01673 | 171B -> 243B | -0.01248 |
| 179A -> 199A | 0.01379  | 174B -> 198B | 0.01534  |
| 182A -> 199A | 0.02975  | 177B -> 198B | -0.02985 |
| 182A -> 200A | 0.02766  | 177B -> 200B | 0.01532  |
| 182A -> 201A | 0.06044  | 177B -> 204B | -0.01129 |
| 182A -> 202A | -0.03112 | 177B -> 205B | -0.01584 |
| 182A -> 203A | -0.03597 | 177B -> 210B | -0.01563 |
| 182A -> 204A | -0.07117 | 180B -> 198B | 0.01486  |
| 182A -> 206A | 0.03293  | 180B -> 199B | 0.01836  |
| 182A -> 207A | -0.01380 | 180B -> 200B | -0.01061 |
| 182A -> 208A | 0.01384  | 180B -> 210B | 0.01320  |
| 183A -> 200A | 0.04264  | 182B -> 198B | 0.05410  |
| 183A -> 201A | -0.02500 | 182B -> 201B | -0.02266 |
| 183A -> 202A | -0.02381 | 182B -> 203B | 0.02913  |
| 183A -> 203A | -0.04994 | 182B -> 206B | -0.01233 |
| 183A -> 204A | -0.01071 | 182B -> 207B | -0.02102 |
| 183A -> 205A | 0.01161  | 182B -> 208B | -0.01002 |
| 183A -> 207A | 0.02912  | 183B -> 198B | 0.06704  |
| 183A -> 209A | 0.01706  | 183B -> 199B | 0.01571  |
| 184A -> 199A | -0.01313 | 183B -> 200B | 0.03219  |
| 184A -> 200A | 0.05084  | 183B -> 203B | 0.04993  |
| 184A -> 201A | 0.01144  | 183B -> 205B | 0.01003  |
| 184A -> 204A | 0.08811  | 183B -> 206B | -0.01302 |
| 184A -> 205A | -0.02567 | 184B -> 198B | 0.01872  |
| 184A -> 207A | -0.02490 | 184B -> 199B | 0.01643  |
| 184A -> 209A | 0.02427  | 184B -> 200B | 0.02803  |
| 185A -> 201A | 0.01234  | 184B -> 203B | 0.04012  |
| 185A -> 204A | -0.02573 | 184B -> 205B | -0.01363 |
| 185A -> 206A | 0.01252  | 185B -> 198B | -0.01908 |
| 185A -> 207A | -0.01205 | 185B -> 199B | 0.01056  |
| 186A -> 200A | 0.03493  | 185B -> 200B | 0.01237  |
| 186A -> 201A | 0.04923  | 185B -> 201B | -0.02960 |
| 186A -> 204A | 0.01522  | 185B -> 203B | 0.02281  |
| 186A -> 205A | 0.04489  | 185B -> 204B | -0.01953 |
| 186A -> 206A | -0.03013 | 185B -> 206B | 0.01678  |
| 186A -> 207A | 0.01398  | 185B -> 207B | 0.02513  |
| 187A -> 200A | -0.01416 | 186B -> 198B | -0.19157 |
| 187A -> 203A | 0.01401  | 186B -> 200B | -0.01174 |
| 188A -> 199A | 0.01765  | 186B -> 203B | -0.04283 |
| 188A -> 201A | -0.01616 | 186B -> 204B | -0.01935 |
| 188A -> 204A | 0.02336  | 186B -> 205B | -0.05167 |
| 189A -> 199A | 0.02563  | 186B -> 206B | 0.01312  |
| 190A -> 199A | 0.02255  | 186B -> 207B | -0.01491 |
| 192A -> 199A | -0.18016 | 187B -> 198B | 0.05167  |
| 192A -> 200A | 0.01603  | 187B -> 199B | -0.03326 |
| 192A -> 201A | -0.01486 | 187B -> 200B | -0.02837 |
| 192A -> 202A | 0.01205  | 187B -> 201B | 0.01338  |
| 192A -> 203A | 0.02398  | 187B -> 203B | -0.03913 |

|              |          |              |          |
|--------------|----------|--------------|----------|
| 192A -> 204A | -0.01758 | 187B -> 204B | 0.02232  |
| 192A -> 209A | 0.01662  | 187B -> 205B | 0.01779  |
| 192A -> 212A | -0.01305 | 188B -> 198B | -0.10480 |
| 193A -> 199A | -0.14103 | 188B -> 203B | -0.02250 |
| 193A -> 200A | -0.07687 | 188B -> 205B | -0.02573 |
| 193A -> 201A | 0.01597  | 188B -> 206B | 0.02112  |
| 193A -> 203A | 0.02742  | 189B -> 198B | 0.03731  |
| 193A -> 204A | -0.06736 | 189B -> 203B | 0.01102  |
| 193A -> 205A | 0.01661  | 189B -> 211B | 0.01319  |
| 194A -> 200A | -0.01324 | 192B -> 198B | -0.06907 |
| 196A -> 199A | 0.02022  | 192B -> 199B | -0.05502 |
| 196A -> 200A | -0.01287 | 192B -> 200B | 0.01843  |
| 198A -> 199A | 0.85350  | 192B -> 205B | -0.01354 |
| 198A -> 200A | 0.01327  | 193B -> 199B | 0.01002  |
| 198A -> 202A | -0.01001 | 195B -> 198B | 0.02152  |
| 198A -> 203A | -0.02366 | 195B -> 199B | 0.04195  |
| 198A -> 204A | 0.04205  | 197B -> 198B | 0.10357  |
| 198A -> 205A | -0.01229 | 197B -> 199B | 0.22692  |
| 156B -> 268B | -0.01074 | 197B -> 203B | 0.04405  |
| 156B -> 270B | -0.01210 | 197B -> 204B | -0.01249 |

Table S28. Cartesian coordinates for optimized structure for **3d<sup>++</sup>**

Symbolic Z-matrix:  
Charge = 1 Multiplicity = 2

| Atom | X        | Y        | Z        | Atom | X        | Y        | Z        |
|------|----------|----------|----------|------|----------|----------|----------|
| C    | 4.098477 | -1.83832 | 0.610646 | C    | -10.5076 | -0.01131 | -4.49887 |
| C    | 5.448867 | -1.60184 | 0.559089 | C    | -9.66987 | 0.011052 | -3.38938 |
| C    | 5.963481 | -0.42299 | -0.01931 | C    | -11.0096 | -0.27935 | 2.864701 |
| C    | 5.042277 | 0.483136 | -0.67633 | C    | -11.554  | -0.35452 | 4.142019 |
| C    | 5.491732 | 1.54456  | -1.47704 | C    | -10.7219 | -0.32073 | 5.260115 |
| C    | 4.591133 | 2.373192 | -2.12128 | C    | -9.34149 | -0.21156 | 5.097047 |
| C    | 3.223266 | 2.184434 | -1.96602 | C    | -8.79409 | -0.13675 | 3.821116 |
| C    | 2.717694 | 1.130051 | -1.20312 | O    | 10.91788 | -4.41502 | 0.182393 |
| C    | 1.277729 | 0.918598 | -1.04412 | O    | 9.469437 | 4.869113 | 0.892065 |
| C    | 0.339123 | 1.820419 | -1.54222 | C    | 10.92496 | -5.43687 | -0.8016  |
| C    | -1.03171 | 1.621975 | -1.37934 | C    | 8.916256 | 5.792001 | 1.816115 |
| C    | -1.52513 | 0.511066 | -0.71673 | H    | 3.774192 | -2.73445 | 1.12404  |
| C    | -0.59879 | -0.456   | -0.22188 | H    | 6.132025 | -2.29684 | 1.034005 |
| C    | -1.0469  | -1.65893 | 0.376134 | H    | 6.551282 | 1.722572 | -1.60713 |
| C    | -0.14921 | -2.58829 | 0.85852  | H    | 4.956343 | 3.179773 | -2.74871 |
| C    | 1.22146  | -2.35205 | 0.767623 | H    | 2.55362  | 2.866085 | -2.47584 |
| C    | 1.727495 | -1.19267 | 0.166755 | H    | 0.654965 | 2.722793 | -2.0522  |
| C    | 0.805591 | -0.23579 | -0.36445 | H    | -1.72547 | 2.368505 | -1.75414 |
| C    | 3.150521 | -0.94126 | 0.07362  | H    | -2.11164 | -1.85479 | 0.439027 |
| C    | 3.635307 | 0.231214 | -0.58352 | H    | -0.50718 | -3.5084  | 1.308638 |
| N    | 7.31081  | -0.18637 | 0.065481 | H    | 1.889321 | -3.10481 | 1.168163 |
| C    | -2.99123 | 0.368836 | -0.53224 | H    | 9.240075 | -0.63307 | 1.872632 |
| C    | 7.848284 | 1.114653 | 0.301688 | H    | 10.82564 | -2.54715 | 1.870042 |
| C    | 8.222774 | -1.28489 | 0.083954 | H    | 8.989834 | -4.05171 | -1.72104 |
| C    | 9.189308 | -1.38673 | 1.092562 | H    | 7.429717 | -2.15431 | -1.71586 |
| C    | 10.07352 | -2.44765 | 1.094631 | H    | 9.460018 | 0.873083 | -1.11241 |
| C    | 10.01178 | -3.42618 | 0.088413 | H    | 10.38323 | 3.144869 | -0.7032  |
| C    | 9.050521 | -3.32053 | -0.92358 | H    | 7.285786 | 3.867804 | 2.196429 |
| C    | 8.165351 | -2.24685 | -0.92157 | H    | 6.384349 | 1.620561 | 1.793747 |
| C    | 8.987574 | 1.5365   | -0.39396 | H    | -2.90384 | 0.308836 | 1.622139 |
| C    | 9.503682 | 2.798467 | -0.1709  | H    | -5.35934 | 0.135635 | 1.906627 |
| C    | 8.89284  | 3.66167  | 0.753078 | H    | -5.87611 | 0.253517 | -2.3406  |
| C    | 7.764136 | 3.231742 | 1.460957 | H    | -3.42056 | 0.426501 | -2.64308 |
| C    | 7.253878 | 1.957098 | 1.236301 | H    | -12.0067 | -0.20927 | -0.93433 |
| C    | -3.55056 | 0.283095 | 0.748858 | H    | -13.5047 | -0.24908 | -2.913   |
| C    | -4.92629 | 0.192147 | 0.913928 | H    | -12.5422 | -0.12206 | -5.19767 |
| C    | -5.77158 | 0.177996 | -0.19911 | H    | -10.0836 | 0.044423 | -5.49716 |
| C    | -5.21797 | 0.266033 | -1.4787  | H    | -8.59457 | 0.083751 | -3.51109 |
| C    | -3.84182 | 0.366654 | -1.64298 | H    | -11.6493 | -0.30436 | 1.989405 |
| C    | -7.2454  | 0.073691 | -0.02247 | H    | -12.6295 | -0.43932 | 4.265759 |
| N    | -7.71307 | 0.001948 | 1.223251 | H    | -11.1488 | -0.37899 | 6.25729  |
| C    | -9.04423 | -0.08944 | 1.335046 | H    | -8.69115 | -0.18419 | 5.966443 |
| N    | -9.87924 | -0.11238 | 0.293602 | H    | -7.72151 | -0.05097 | 3.684701 |
| C    | -9.31798 | -0.03697 | -0.91568 | H    | 11.73041 | -6.1129  | -0.51758 |
| N    | -7.99835 | 0.058421 | -1.12164 | H    | 9.974366 | -5.9829  | -0.80842 |
| C    | -10.208  | -0.0604  | -2.09974 | H    | 11.12835 | -5.02334 | -1.79621 |
| C    | -9.62492 | -0.1701  | 2.695767 | H    | 9.539437 | 6.683017 | 1.750931 |

|   |          |          |          |   |          |          |          |
|---|----------|----------|----------|---|----------|----------|----------|
| C | -11.5945 | -0.15436 | -1.93589 | H | 7.884253 | 6.047035 | 1.547828 |
| C | -12.4296 | -0.17628 | -3.0474  | H | 8.951842 | 5.395291 | 2.837422 |
| C | -11.8885 | -0.10491 | -4.33029 |   |          |          |          |



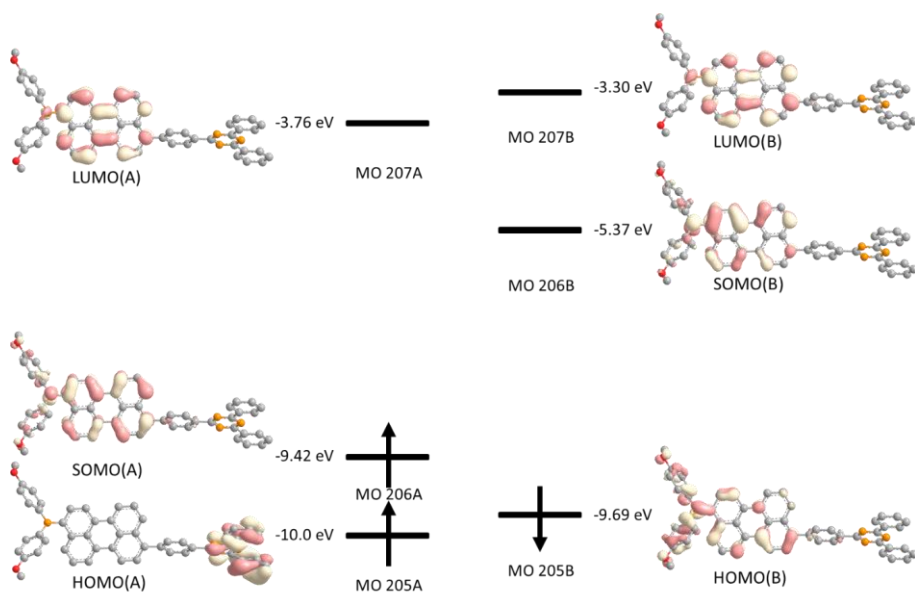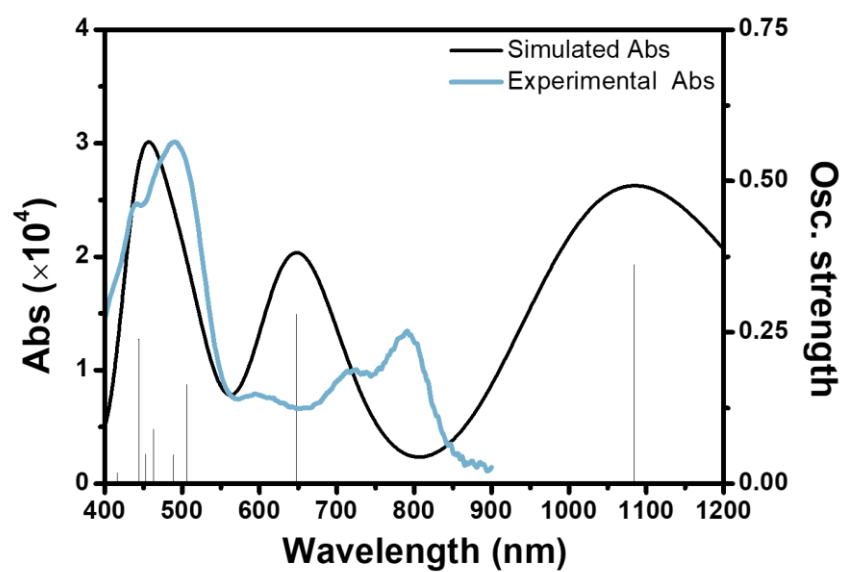

Figure S33. (Up): Energy levels and isodensity plots (isodensity contour = 0.035 a.u.) of  $3d^+$  (Down): Electronic transition of the simulated/SEC experimental absorption spectra of  $3d^+$

Table S29. TD-DFT calculation: Transition assignment of **3d<sup>++</sup>**

| Excited State 1: 2.075-?Sym |          | 1.1431 eV 1084.60 nm f=0.3624 <S**2>=0.826 |          |
|-----------------------------|----------|--------------------------------------------|----------|
| 185A -> 207A                | 0.02348  | 186B -> 207B                               | 0.02819  |
| 188A -> 207A                | 0.01484  | 189B -> 206B                               | 0.11015  |
| 190A -> 207A                | -0.01784 | 189B -> 207B                               | -0.06534 |
| 190A -> 208A                | 0.02118  | 189B -> 215B                               | -0.01292 |
| 190A -> 209A                | 0.03055  | 189B -> 218B                               | 0.01263  |
| 190A -> 214A                | 0.01383  | 190B -> 206B                               | -0.01010 |
| 191A -> 208A                | -0.01749 | 190B -> 209B                               | 0.02350  |
| 191A -> 211A                | 0.01357  | 190B -> 215B                               | 0.02104  |
| 192A -> 207A                | -0.01648 | 191B -> 212B                               | -0.01011 |
| 192A -> 208A                | 0.01211  | 191B -> 215B                               | -0.01059 |
| 192A -> 209A                | 0.01860  | 192B -> 206B                               | -0.02803 |
| 192A -> 214A                | 0.01218  | 192B -> 207B                               | 0.01171  |
| 192A -> 215A                | -0.01728 | 193B -> 206B                               | -0.04860 |
| 193A -> 207A                | -0.01502 | 193B -> 207B                               | 0.03620  |
| 193A -> 209A                | 0.01029  | 193B -> 211B                               | 0.01650  |
| 194A -> 216A                | -0.01381 | 193B -> 215B                               | -0.01137 |
| 198A -> 214A                | -0.01172 | 194B -> 207B                               | 0.04181  |
| 200A -> 207A                | -0.01478 | 194B -> 211B                               | 0.01159  |
| 200A -> 209A                | -0.01079 | 194B -> 215B                               | -0.01876 |
| 203A -> 207A                | 0.02399  | 195B -> 206B                               | -0.11478 |
| 203A -> 209A                | -0.01341 | 195B -> 207B                               | -0.07600 |
| 203A -> 211A                | -0.01560 | 195B -> 208B                               | 0.02885  |
| 203A -> 212A                | 0.01813  | 195B -> 211B                               | 0.02024  |
| 204A -> 207A                | 0.01761  | 195B -> 213B                               | -0.01824 |
| 206A -> 207A                | 0.14671  | 195B -> 215B                               | -0.01396 |
| 206A -> 208A                | 0.02666  | 196B -> 207B                               | 0.01475  |
| 206A -> 211A                | -0.01328 | 199B -> 206B                               | 0.01715  |
| 206A -> 213A                | -0.01300 | 199B -> 207B                               | -0.01323 |
| 206A -> 214A                | 0.01203  | 199B -> 212B                               | 0.01644  |
| 163B -> 206B                | -0.01594 | 199B -> 214B                               | 0.04550  |
| 167B -> 206B                | 0.01066  | 200B -> 206B                               | 0.08299  |
| 174B -> 213B                | 0.01197  | 200B -> 207B                               | -0.08300 |
| 175B -> 213B                | -0.01079 | 200B -> 211B                               | 0.01435  |
| 176B -> 211B                | -0.01555 | 201B -> 206B                               | 0.01746  |
| 177B -> 213B                | 0.01092  | 203B -> 206B                               | 0.05583  |
| 178B -> 211B                | -0.01439 | 203B -> 207B                               | -0.01417 |
| 179B -> 206B                | 0.01096  | 205B -> 206B                               | 0.95097  |
| 182B -> 207B                | 0.01190  | 205B -> 207B                               | -0.08264 |
| 186B -> 206B                | -0.03395 | 205B -> 218B                               | 0.01119  |
| Excited State 2: 2.523-?Sym |          | 1.9142 eV 647.72 nm f=0.2803 <S**2>=1.342  |          |
| 165A -> 277A                | 0.01120  | 204A -> 211A                               | -0.01481 |
| 170A -> 239A                | -0.01107 | 204A -> 212A                               | 0.02949  |
| 173A -> 207A                | -0.01648 | 206A -> 207A                               | 0.81122  |
| 173A -> 236A                | 0.01825  | 206A -> 208A                               | -0.01206 |
| 173A -> 238A                | -0.01043 | 206A -> 211A                               | 0.02922  |
| 173A -> 239A                | 0.01562  | 206A -> 212A                               | -0.04801 |
| 173A -> 240A                | -0.01138 | 166B -> 278B                               | 0.01467  |
| 173A -> 242A                | 0.02028  | 170B -> 241B                               | 0.01124  |
| 173A -> 244A                | 0.01035  | 174B -> 206B                               | 0.01244  |
| 174A -> 239A                | 0.01221  | 175B -> 206B                               | -0.01264 |
| 174A -> 240A                | 0.01088  | 175B -> 241B                               | 0.01153  |

|              |          |              |          |
|--------------|----------|--------------|----------|
| 182A -> 207A | -0.01127 | 176B -> 236B | 0.01014  |
| 182A -> 212A | 0.01016  | 176B -> 242B | 0.01373  |
| 185A -> 207A | -0.01707 | 176B -> 244B | 0.01122  |
| 185A -> 208A | -0.01831 | 176B -> 246B | 0.01214  |
| 185A -> 209A | 0.01066  | 176B -> 251B | -0.01158 |
| 185A -> 211A | 0.01241  | 177B -> 206B | 0.01367  |
| 185A -> 212A | -0.01192 | 182B -> 206B | 0.02180  |
| 185A -> 218A | 0.01795  | 186B -> 206B | 0.02574  |
| 185A -> 223A | 0.01002  | 186B -> 208B | 0.01003  |
| 185A -> 239A | 0.01138  | 186B -> 211B | 0.01027  |
| 188A -> 207A | -0.01991 | 186B -> 213B | -0.01523 |
| 188A -> 218A | 0.01236  | 189B -> 206B | -0.03809 |
| 188A -> 239A | 0.01186  | 189B -> 207B | 0.01618  |
| 190A -> 207A | 0.02486  | 189B -> 208B | -0.02298 |
| 190A -> 208A | -0.03078 | 189B -> 211B | -0.01053 |
| 190A -> 209A | -0.04503 | 189B -> 213B | 0.02641  |
| 190A -> 211A | 0.02909  | 189B -> 218B | -0.01858 |
| 190A -> 212A | 0.05607  | 189B -> 223B | -0.01466 |
| 190A -> 213A | 0.02795  | 190B -> 206B | -0.05316 |
| 190A -> 214A | -0.02571 | 190B -> 209B | -0.02261 |
| 190A -> 216A | 0.01567  | 190B -> 211B | 0.03302  |
| 191A -> 207A | 0.01673  | 190B -> 213B | 0.01321  |
| 191A -> 208A | -0.01525 | 190B -> 215B | -0.01513 |
| 191A -> 209A | 0.02471  | 190B -> 216B | 0.01305  |
| 191A -> 211A | 0.05392  | 191B -> 209B | 0.01155  |
| 191A -> 212A | 0.05265  | 191B -> 215B | 0.01500  |
| 191A -> 213A | 0.02558  | 192B -> 206B | 0.04369  |
| 191A -> 214A | 0.01995  | 192B -> 207B | -0.01242 |
| 191A -> 215A | -0.03421 | 192B -> 208B | -0.01300 |
| 192A -> 208A | -0.02608 | 192B -> 211B | -0.03018 |
| 192A -> 209A | -0.03062 | 192B -> 213B | -0.01018 |
| 192A -> 211A | 0.02290  | 193B -> 206B | 0.10806  |
| 192A -> 212A | 0.03586  | 193B -> 207B | -0.01881 |
| 192A -> 213A | 0.01617  | 193B -> 208B | -0.02969 |
| 192A -> 214A | -0.02226 | 193B -> 209B | -0.01428 |
| 192A -> 215A | 0.01006  | 193B -> 211B | -0.06569 |
| 193A -> 208A | -0.05802 | 193B -> 212B | -0.02418 |
| 193A -> 209A | 0.01350  | 193B -> 213B | -0.02669 |
| 193A -> 211A | 0.02641  | 193B -> 214B | 0.01589  |
| 193A -> 212A | -0.08481 | 193B -> 216B | -0.01312 |
| 193A -> 215A | 0.01527  | 194B -> 206B | 0.10298  |
| 193A -> 218A | 0.02193  | 194B -> 208B | -0.01278 |
| 193A -> 223A | 0.01441  | 194B -> 209B | 0.02558  |
| 194A -> 208A | 0.03444  | 194B -> 211B | -0.04777 |
| 194A -> 211A | -0.03104 | 194B -> 212B | 0.01696  |
| 194A -> 212A | 0.01540  | 194B -> 213B | -0.04117 |
| 195A -> 208A | 0.03731  | 194B -> 215B | -0.03967 |
| 195A -> 209A | 0.03489  | 195B -> 206B | -0.14572 |
| 195A -> 211A | -0.01429 | 195B -> 207B | -0.06632 |
| 195A -> 213A | 0.04863  | 195B -> 208B | -0.02738 |
| 195A -> 214A | -0.03655 | 195B -> 209B | 0.01728  |
| 195A -> 215A | 0.01729  | 195B -> 211B | -0.04155 |
| 196A -> 207A | 0.02472  | 195B -> 212B | 0.01775  |
| 197A -> 207A | 0.01622  | 195B -> 213B | 0.04778  |

|              |          |              |          |
|--------------|----------|--------------|----------|
| 198A -> 207A | 0.03489  | 195B -> 223B | -0.01402 |
| 198A -> 212A | -0.01340 | 196B -> 206B | 0.03005  |
| 200A -> 207A | -0.16136 | 196B -> 219B | -0.01111 |
| 200A -> 208A | -0.02797 | 199B -> 206B | -0.05250 |
| 200A -> 209A | 0.02501  | 199B -> 207B | 0.01009  |
| 200A -> 211A | -0.01658 | 199B -> 214B | -0.02214 |
| 200A -> 218A | 0.01782  | 200B -> 206B | -0.09423 |
| 200A -> 220A | 0.01263  | 200B -> 207B | 0.02589  |
| 201A -> 207A | -0.03502 | 200B -> 208B | -0.02562 |
| 202A -> 207A | 0.01830  | 200B -> 211B | -0.01707 |
| 203A -> 207A | -0.23732 | 200B -> 213B | 0.02425  |
| 203A -> 208A | 0.05456  | 200B -> 218B | -0.01118 |
| 203A -> 209A | -0.02640 | 203B -> 206B | -0.01356 |
| 203A -> 211A | -0.03780 | 203B -> 207B | 0.01920  |
| 203A -> 212A | 0.06477  | 205B -> 206B | -0.07733 |
| 204A -> 207A | -0.07757 | 205B -> 207B | 0.30003  |
| 204A -> 208A | 0.03059  | 205B -> 211B | 0.04433  |
| 204A -> 209A | -0.01624 | 205B -> 214B | -0.01033 |

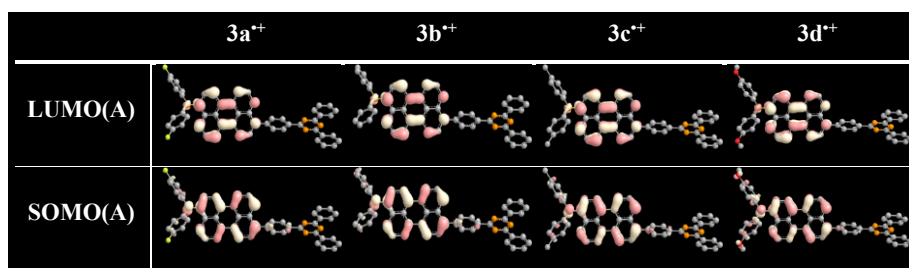

Figure S34. Frontier orbital distributions (SOMO(A), LUMO(A)) of  $3a^{++}$ – $3d^{++}$  calculated by DFT using  $\omega$ B97XD function and 6-31+G+(d) basis

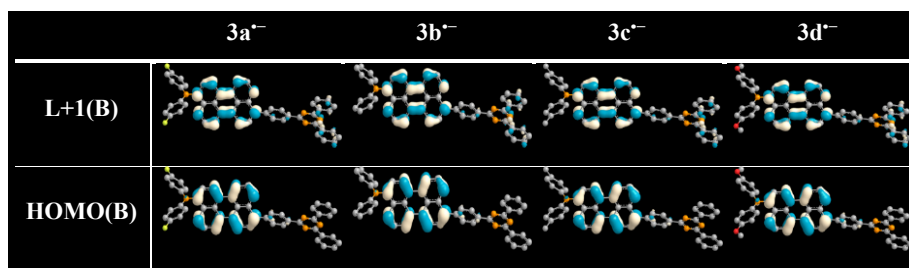

Figure S35. Frontier orbital distributions (HOMO(B), LUMO+1(B)) of  $3a^{--}$ – $3d^{--}$  calculated by DFT using  $\omega$ B97XD function and 6-31+G+(d) basis

■ Spin density plots: Radical cations

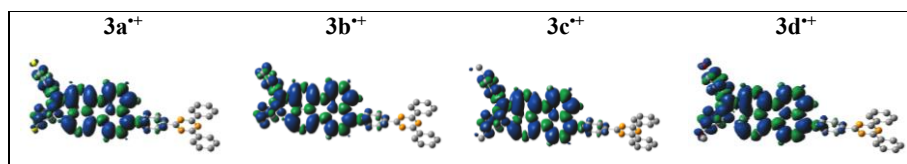

■ Spin density plots: Radical anions

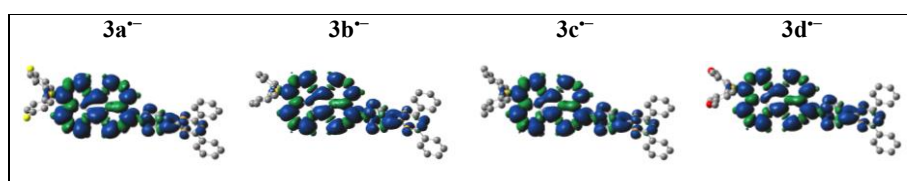

Figure S36. DFT calculated spin density distribution plots of radical cations  $3a^+$ – $3d^+$  and radical anions  $3a^-$ – $3d^-$  ( $\omega$ B97XD/6-31+G(d), isosurface value= 0.0004 a.u.)

Table S30. Calculated Vertical Ionization Potential (IP) and Vertical Electron Affinity (EA) according to the conceptual density functional theory at the  $\omega$ B97XD/6-31+G(d) level

| Compounds                                   | $E_{Neutral}^a$<br>(Hartrees) | $E_{Cation}^b$<br>(Hartrees) | $E_{Anion}^c$<br>(Hartrees) | IP <sup>d</sup><br>(eV) | EA <sup>e</sup><br>(eV) |
|---------------------------------------------|-------------------------------|------------------------------|-----------------------------|-------------------------|-------------------------|
| <b>3a / 3a<sup>+</sup> / 3a<sup>-</sup></b> | -2456.94775                   | -2456.71649                  | -2456.99756                 | 6.29                    | 1.36                    |
| <b>3b / 3b<sup>+</sup> / 3b<sup>-</sup></b> | -2258.51809                   | -2258.29153                  | -2258.56417                 | 6.16                    | 1.25                    |
| <b>3c / 3c<sup>+</sup> / 3c<sup>-</sup></b> | -2337.13168                   | -2336.9088                   | -2337.17648                 | 6.06                    | 1.22                    |
| <b>3d / 3d<sup>+</sup> / 3d<sup>-</sup></b> | -2487.4995                    | -2487.27979                  | -2487.5439                  | 5.98                    | 1.21                    |

<sup>a</sup>The total energy for neutral state  $3a$ – $3d$ . <sup>b</sup>The total energy for radical cationic state  $3a^+$ – $3d^+$ . <sup>c</sup>The total energy for radical anionic state  $3a^-$ – $3d^-$ . <sup>d</sup> $E_{Cation} - E_{Neutral}$ . <sup>e</sup> $E_{Neutral} - E_{Anion}$ .

Formatted: Font: Italic, Superscript

## References

1. H. Schlegel, G. Scuseria, M. Robb, J. Cheeseman, G. Scalmani, V. Barone, G. Petersson, H. Nakatsuji, X. Li and M. Caricato, *Gaussian 16, Revision B. 01*, Gaussian, Inc., Wallingford CT., 2016.
2. a) C. Lee, W. Yang and R. G. Parr, Development of the Colle-Salvetti correlation-energy formula into a functional of the electron density, *Phys. Rev B*, 1988, **37**, 785. b) S. H. Vosko, L. Wilk and M. Nusair, Accurate spin-dependent electron liquid correlation energies for local spin density calculations: a critical analysis, *Can. J. Phys.*, 1980, **58**, 1200-1211. c) A. Becke, Density-functional thermochemistry. III. The role of exact exchange, *Chem. Phys.*, **98**, 5648. d) P. J. Stephens, F. J. Devlin, C. F. Chabalowski and M. J. Frisch, Ab initio calculation of vibrational absorption and circular dichroism spectra using density functional force fields, *J. Phys. Chem.*, 1994, **98**, 11623-11627.
3. a) S. Huzinaga, J. Andzelm, E. Radzio-Andzelm, Y. Sakai, H. Tatewaki and M. Klobukowski, *Gaussian basis sets for molecular calculations*, Elsevier, 2012. b) E. R. Davidson and D. Feller, Basis set selection for molecular calculations, *Chem. Rev.*, 1986, **86**, 681-696.
4. a) J.-D. Chai and M. Head-Gordon, *Phys. Chem. Chem. Phys.*, 2008, **10**, 6615-6620. b) U. Salzner and A. Aydin, *J. Chem. Theory Comput.*, 2011, **7**, 2568-2583. c) C.-R. Zhang, J. S. Sears, B. Yang, S. G. Aziz, V. Coropceanu and J.-L. Bredas, *J. Chem. Theory Comput.*, 2014, **10**, 2379-2388. d) R. S. Bhatta, G. Pellicane and M. Tsige, *Comput. Theor. Chem.*, 2015, **1070**, 14-20.
